# Supplementary material for: Rh( iii )-catalyzed regioselective C–H activation/[3 + 2] cyclization of KHAs with iodonium ylides accessing pyrimido[1,2- a ]indole derivatives
Source: Royal Society of Chemistry journal article supplement (doi:10.1039/d4qo01383b), 2024-01-01
Supplement: d4qo01383b1.pdf [file d4qo01383b1.pdf]

## Rh(III)-catalyzed regioselective C–H activation/[3+2] cyclization of KHAs with iodonium ylides accessing pyrimido[1,2-*a*]indole derivatives†

Qin Luo<sup>a</sup>, Jin-Mei Qi<sup>a</sup>, Li Chen, Cen Jian<sup>a</sup>, Cong-Hai Zhang<sup>a,\*</sup> and Sheng-Jiao Yan<sup>a,\*</sup>

*Key Laboratory of Medicinal Chemistry for Natural Resources (Yunnan University), Ministry of Education, School of Chemical Science and Technology, Yunnan University, Kunming, 650091, P. R. China*

### Supporting Information

|                                                                                                                                  |     |
|----------------------------------------------------------------------------------------------------------------------------------|-----|
| 1. General Information.....                                                                                                      | S4  |
| 2. General Procedure for the Preparation of <b>3-5</b> .....                                                                     | S4  |
| 2.1 Synthesis of pyrimido[1,2- <i>a</i> ]indole derivatives (PIIDOs) <b>3</b> .....                                              | S4  |
| 2.2 Synthesis of pyrimido[1,2- <i>a</i> ]indole derivatives (PIIDOs) <b>4</b> .....                                              | S5  |
| 2.3 Synthesis of pyrimido[1,2- <i>a</i> ]indole derivatives (PIIDOs) <b>5</b> .....                                              | S5  |
| 2.4 Synthesis of pyrimido[1,2- <i>a</i> ]indole derivatives (PIIDOs) <b>3k</b> .....                                             | S6  |
| 3. Spectroscopic Data. ....                                                                                                      | S6  |
| <b>Figure S1.</b> X-Ray crystal structure of <b>3d</b> .....                                                                     | S19 |
| <b>Table S1.</b> Crystal data and structure refinement for <b>3d</b> .....                                                       | S19 |
| <b>Table S2.</b> Bond lengths (Å) for <b>3d</b> .....                                                                            | S20 |
| <b>Figure S2.</b> X-Ray crystal structure of <b>4h</b> .....                                                                     | S21 |
| <b>Table S3.</b> Crystal data and structure refinement for <b>4h</b> .....                                                       | S21 |
| <b>Table S4.</b> Bond lengths (Å) for <b>4h</b> .....                                                                            | S22 |
| <b>Figure S3.</b> <sup>1</sup> H NMR (600 MHz, DMSO- <i>d</i> <sub>6</sub> ) spectra of compound <b>3a</b> .....                 | S24 |
| <b>Figure S4.</b> <sup>13</sup> C NMR (150 MHz, DMSO- <i>d</i> <sub>6</sub> ) spectra of compound <b>3a</b> .....                | S25 |
| <b>Figure S5.</b> <sup>1</sup> H NMR (500 MHz, CDCl <sub>3</sub> - <i>d</i> <sub>6</sub> ) spectra of compound <b>3b</b> .....   | S26 |
| <b>Figure S6.</b> <sup>13</sup> C NMR (125 MHz, CDCl <sub>3</sub> - <i>d</i> <sub>6</sub> ) spectra of compound <b>3b</b> .....  | S27 |
| <b>Figure S7.</b> <sup>1</sup> H NMR (600 MHz, CDCl <sub>3</sub> - <i>d</i> <sub>6</sub> ) spectra of compound <b>3c</b> .....   | S28 |
| <b>Figure S8.</b> <sup>13</sup> C NMR (150 MHz, CDCl <sub>3</sub> - <i>d</i> <sub>6</sub> ) spectra of compound <b>3c</b> .....  | S29 |
| <b>Figure S9.</b> <sup>1</sup> H NMR (500 MHz, DMSO- <i>d</i> <sub>6</sub> ) spectra of compound <b>3d</b> .....                 | S30 |
| <b>Figure S10.</b> <sup>13</sup> C NMR (125 MHz, DMSO- <i>d</i> <sub>6</sub> ) spectra of compound <b>3d</b> .....               | S31 |
| <b>Figure S11.</b> <sup>19</sup> F NMR (475 MHz, DMSO- <i>d</i> <sub>6</sub> ) spectra of compound <b>3d</b> .....               | S32 |
| <b>Figure S12.</b> <sup>1</sup> H NMR (500 MHz, CDCl <sub>3</sub> - <i>d</i> <sub>6</sub> ) spectra of compound <b>3e</b> .....  | S33 |
| <b>Figure S13.</b> <sup>13</sup> C NMR (125 MHz, CDCl <sub>3</sub> - <i>d</i> <sub>6</sub> ) spectra of compound <b>3e</b> ..... | S34 |
| <b>Figure S14.</b> <sup>1</sup> H NMR (500 MHz, DMSO- <i>d</i> <sub>6</sub> ) spectra of compound <b>3f</b> .....                | S35 |
| <b>Figure S15.</b> <sup>13</sup> C NMR (125 MHz, DMSO- <i>d</i> <sub>6</sub> ) spectra of compound <b>3f</b> .....               | S36 |

|                                                                                                                |     |
|----------------------------------------------------------------------------------------------------------------|-----|
| <b>Figure S16.</b> $^{19}\text{F}$ NMR (475 MHz, $\text{DMSO-}d_6$ ) spectra of compound <b>3f</b> .....       | S37 |
| <b>Figure S17.</b> $^1\text{H}$ NMR (500 MHz, $\text{CDCl}_3$ - $d_6$ ) spectra of compound <b>3g</b> .....    | S38 |
| <b>Figure S18.</b> $^{13}\text{C}$ NMR (125 MHz, $\text{CDCl}_3$ - $d_6$ ) spectra of compound <b>3g</b> ..... | S39 |
| <b>Figure S19.</b> $^1\text{H}$ NMR (600 MHz, $\text{DMSO-}d_6$ ) spectra of compound <b>3h</b> .....          | S40 |
| <b>Figure S20.</b> $^{13}\text{C}$ NMR (150 MHz, $\text{DMSO-}d_6$ ) spectra of compound <b>3h</b> .....       | S41 |
| <b>Figure S21.</b> $^1\text{H}$ NMR (500 MHz, $\text{DMSO-}d_6$ ) spectra of compound <b>3i</b> .....          | S42 |
| <b>Figure S22.</b> $^{13}\text{C}$ NMR (125 MHz, $\text{DMSO-}d_6$ ) spectra of compound <b>3i</b> .....       | S43 |
| <b>Figure S23.</b> $^{19}\text{F}$ NMR (475 MHz, $\text{DMSO-}d_6$ ) spectra of compound <b>3i</b> .....       | S44 |
| <b>Figure S24.</b> $^1\text{H}$ NMR (600 MHz, $\text{CDCl}_3$ - $d_6$ ) spectra of compound <b>3j</b> .....    | S45 |
| <b>Figure S25.</b> $^{13}\text{C}$ NMR (150 MHz, $\text{CDCl}_3$ - $d_6$ ) spectra of compound <b>3j</b> ..... | S46 |
| <b>Figure S26.</b> $^1\text{H}$ NMR (500 MHz, $\text{DMSO-}d_6$ ) spectra of compound <b>3k</b> .....          | S47 |
| <b>Figure S27.</b> $^{13}\text{C}$ NMR (125 MHz, $\text{DMSO-}d_6$ ) spectra of compound <b>3k</b> .....       | S48 |
| <b>Figure S28.</b> $^1\text{H}$ NMR (500 MHz, $\text{DMSO-}d_6$ ) spectra of compound <b>3l</b> .....          | S49 |
| <b>Figure S29.</b> $^{13}\text{C}$ NMR (125 MHz, $\text{DMSO-}d_6$ ) spectra of compound <b>3l</b> .....       | S50 |
| <b>Figure S30.</b> $^{19}\text{F}$ NMR (475 MHz, $\text{DMSO-}d_6$ ) spectra of compound <b>3l</b> .....       | S51 |
| <b>Figure S31.</b> $^1\text{H}$ NMR (500 MHz, $\text{CDCl}_3$ - $d_6$ ) spectra of compound <b>3m</b> .....    | S52 |
| <b>Figure S32.</b> $^{13}\text{C}$ NMR (125 MHz, $\text{CDCl}_3$ - $d_6$ ) spectra of compound <b>3m</b> ..... | S53 |
| <b>Figure S33.</b> $^1\text{H}$ NMR (600 MHz, $\text{CDCl}_3$ - $d_6$ ) spectra of compound <b>3n</b> .....    | S54 |
| <b>Figure S34.</b> $^{13}\text{C}$ NMR (150 MHz, $\text{CDCl}_3$ - $d_6$ ) spectra of compound <b>3n</b> ..... | S55 |
| <b>Figure S35.</b> $^1\text{H}$ NMR (500 MHz, $\text{DMSO-}d_6$ ) spectra of compound <b>3o</b> .....          | S56 |
| <b>Figure S36.</b> $^{13}\text{C}$ NMR (125 MHz, $\text{DMSO-}d_6$ ) spectra of compound <b>3o</b> .....       | S57 |
| <b>Figure S37.</b> $^1\text{H}$ NMR (500 MHz, $\text{CDCl}_3$ - $d_6$ ) spectra of compound <b>3p</b> .....    | S58 |
| <b>Figure S38.</b> $^{13}\text{C}$ NMR (125 MHz, $\text{CDCl}_3$ - $d_6$ ) spectra of compound <b>3p</b> ..... | S59 |
| <b>Figure S39.</b> $^1\text{H}$ NMR (600 MHz, $\text{DMSO-}d_6$ ) spectra of compound <b>3q</b> .....          | S60 |
| <b>Figure S40.</b> $^{13}\text{C}$ NMR (150 MHz, $\text{DMSO-}d_6$ ) spectra of compound <b>3q</b> .....       | S61 |
| <b>Figure S41.</b> $^1\text{H}$ NMR (500 MHz, $\text{CDCl}_3$ - $d_6$ ) spectra of compound <b>3r</b> .....    | S62 |
| <b>Figure S42.</b> $^{13}\text{C}$ NMR (125 MHz, $\text{CDCl}_3$ - $d_6$ ) spectra of compound <b>3r</b> ..... | S63 |
| <b>Figure S43.</b> $^1\text{H}$ NMR (500 MHz, $\text{DMSO-}d_6$ ) spectra of compound <b>4a</b> .....          | S64 |
| <b>Figure S44.</b> $^{13}\text{C}$ NMR (150 MHz, $\text{CDCl}_3$ - $d_6$ ) spectra of compound <b>4a</b> ..... | S65 |
| <b>Figure S45.</b> $^1\text{H}$ NMR (600 MHz, $\text{DMSO-}d_6$ ) spectra of compound <b>4b</b> .....          | S66 |
| <b>Figure S46.</b> $^{13}\text{C}$ NMR (150 MHz, $\text{DMSO-}d_6$ ) spectra of compound <b>4b</b> .....       | S67 |
| <b>Figure S47.</b> $^1\text{H}$ NMR (600 MHz, $\text{CDCl}_3$ - $d_6$ ) spectra of compound <b>4c</b> .....    | S68 |
| <b>Figure S48.</b> $^{13}\text{C}$ NMR (150 MHz, $\text{CDCl}_3$ - $d_6$ ) spectra of compound <b>4c</b> ..... | S69 |
| <b>Figure S49.</b> $^1\text{H}$ NMR (500 MHz, $\text{CDCl}_3$ - $d_6$ ) spectra of compound <b>4d</b> .....    | S70 |
| <b>Figure S50.</b> $^{13}\text{C}$ NMR (125 MHz, $\text{CDCl}_3$ - $d_6$ ) spectra of compound <b>4d</b> ..... | S71 |
| <b>Figure S51.</b> $^1\text{H}$ NMR (500 MHz, $\text{CDCl}_3$ - $d_6$ ) spectra of compound <b>4e</b> .....    | S72 |
| <b>Figure S52.</b> $^{13}\text{C}$ NMR (125 MHz, $\text{CDCl}_3$ - $d_6$ ) spectra of compound <b>4e</b> ..... | S73 |
| <b>Figure S53.</b> $^{19}\text{F}$ NMR (475 MHz, $\text{CDCl}_3$ - $d_6$ ) spectra of compound <b>4e</b> ..... | S74 |
| <b>Figure S54.</b> $^1\text{H}$ NMR (500 MHz, $\text{CDCl}_3$ - $d_6$ ) spectra of compound <b>4f</b> .....    | S75 |
| <b>Figure S55.</b> $^{13}\text{C}$ NMR (125 MHz, $\text{CDCl}_3$ - $d_6$ ) spectra of compound <b>4f</b> ..... | S76 |

|                                                                                                            |     |
|------------------------------------------------------------------------------------------------------------|-----|
| <b>Figure S56.</b> $^{19}\text{F}$ NMR (475 MHz, $\text{CDCl}_3-d_6$ ) spectra of compound <b>4f</b> ..... | S77 |
| <b>Figure S57.</b> $^1\text{H}$ NMR (600 MHz, $\text{DMSO}-d_6$ ) spectra of compound <b>4g</b> .....      | S78 |
| <b>Figure S58.</b> $^{13}\text{C}$ NMR (150 MHz, $\text{DMSO}-d_6$ ) spectra of compound <b>4g</b> .....   | S79 |
| <b>Figure S59.</b> $^1\text{H}$ NMR (500 MHz, $\text{CDCl}_3-d_6$ ) spectra of compound <b>4h</b> .....    | S80 |
| <b>Figure S60.</b> $^{13}\text{C}$ NMR (125 MHz, $\text{CDCl}_3-d_6$ ) spectra of compound <b>4h</b> ..... | S81 |
| <b>Figure S61.</b> $^{19}\text{F}$ NMR (475 MHz, $\text{CDCl}_3-d_6$ ) spectra of compound <b>4h</b> ..... | S82 |
| <b>Figure S62.</b> $^1\text{H}$ NMR (500 MHz, $\text{DMSO}-d_6$ ) spectra of compound <b>4i</b> .....      | S83 |
| <b>Figure S63.</b> $^{13}\text{C}$ NMR (125 MHz, $\text{DMSO}-d_6$ ) spectra of compound <b>4i</b> .....   | S84 |
| <b>Figure S64.</b> $^{19}\text{F}$ NMR (475 MHz, $\text{DMSO}-d_6$ ) spectra of compound <b>4i</b> .....   | S85 |
| <b>Figure S65.</b> $^1\text{H}$ NMR (600 MHz, $\text{DMSO}-d_6$ ) spectra of compound <b>5a</b> .....      | S86 |
| <b>Figure S66.</b> $^{13}\text{C}$ NMR (150 MHz, $\text{DMSO}-d_6$ ) spectra of compound <b>5a</b> .....   | S87 |
| <b>Figure S67.</b> $^1\text{H}$ NMR (600 MHz, $\text{DMSO}-d_6$ ) spectra of compound <b>5b</b> .....      | S88 |
| <b>Figure S68.</b> $^{13}\text{C}$ NMR (150 MHz, $\text{DMSO}-d_6$ ) spectra of compound <b>5b</b> .....   | S89 |
| <b>Figure S69.</b> $^1\text{H}$ NMR (600 MHz, $\text{DMSO}-d_6$ ) spectra of compound <b>5c</b> .....      | S90 |
| <b>Figure S70.</b> $^{13}\text{C}$ NMR (150 MHz, $\text{DMSO}-d_6$ ) spectra of compound <b>5c</b> .....   | S91 |
| <b>Figure S71.</b> $^1\text{H}$ NMR (500 MHz, $\text{DMSO}-d_6$ ) spectra of compound <b>5d</b> .....      | S92 |
| <b>Figure S72.</b> $^{13}\text{C}$ NMR (125 MHz, $\text{DMSO}-d_6$ ) spectra of compound <b>5d</b> .....   | S93 |
| <b>References</b> .....                                                                                    | S94 |

## 1. General Information.

All compounds were fully characterized by spectroscopic data. The NMR spectra were recorded on a Bruker DRX500 or DRX600, chemical shifts ( $\delta$ ) are expressed in ppm, and  $J$  values are given in Hz, and deuterated  $\text{CDCl}_3$  was used as solvent. The reactions were monitored by thin layer chromatography (TLC) using silica gel GF<sub>254</sub>. The melting points were determined on XT-4A melting point apparatus and are uncorrected. HRMs were performed on a Agilent LC/Msd TOF instrument. X-ray diffraction was obtained by APEX DUO.

All chemicals and solvents were used as received without further purification unless otherwise stated. All chemicals were purchased from Adamas-beta. Column chromatography was performed on silica gel (Qingdao, 200–300 mesh). HKAs **1** were prepared according to the literature<sup>[1]</sup>. Iodonium ylides were prepared according to the literature<sup>[2]</sup>.

## 2. General Procedure for the Preparation of 3-5

### 2.1 Synthesis of pyrimido[1,2-a]indole derivatives (PIDOs) **3**.

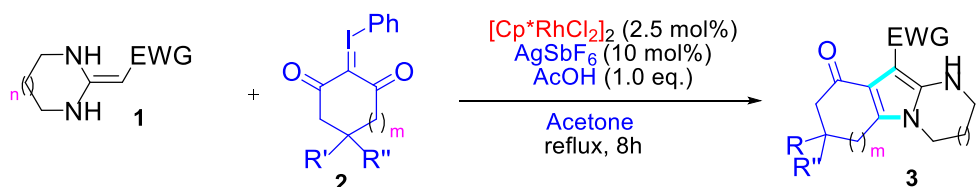

Enaminones (**1**, 1.1 mmol), iodonium ylides (**2**, 1.0 mmol),  $[\text{Cp}^*\text{RhCl}_2]_2$  (2.5 mol%),  $\text{AgSbF}_6$  (10.0 mol%), and acetic acid (HOAc, 1.0 mmol) were combined in a 25 mL round-bottom flask. The mixture was stirred and heated under reflux in acetone (5 mL) for 8 hours, or until the iodonium ylides were completely consumed. Subsequently, the mixture was allowed to cool to room temperature, followed by the addition of dichloromethane (DCM, 15 mL $\times$ 2). The organic phase was washed with a sodium chloride (NaCl) solution (10 mL), dried over sodium sulfate ( $\text{Na}_2\text{SO}_4$ ), concentrated, and purified by flash column chromatography to yield compound **3**.

## 2.2 Synthesis of pyrimido[1,2-a]indole derivatives (PIIDOs) 4.

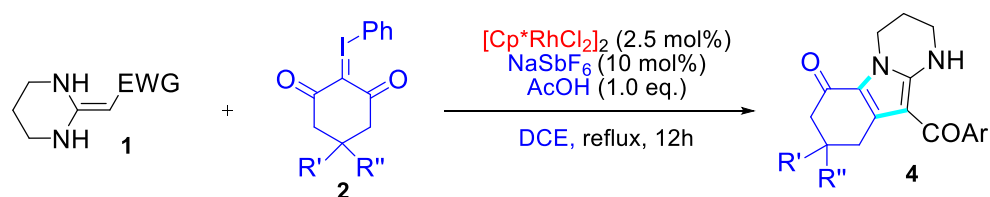

Enaminones (**1**, 1.1 mmol), iodonium ylides (**2**, 1.0 mmol),  $[\text{Cp}^*\text{RhCl}_2]_2$  (2.5 mol%),  $\text{NaSbF}_6$  (10.0 mol%), and acetic acid (1.0 mmol) were added to a 25 mL round-bottom flask. The mixture was stirred and heated under reflux in dichloroethane (5 mL) for 12 hours, or until the iodonium ylides were completely consumed. Following this, the mixture was cooled to room temperature, and dichloromethane (DCM, 15 mL  $\times$  2) was added. The organic layer was washed with a sodium chloride (NaCl) solution (10 mL), dried over sodium sulfate ( $\text{Na}_2\text{SO}_4$ ), concentrated, and purified by flash column chromatography to yield compounds **4**.

## 2.3 Synthesis of pyrimido[1,2-a]indole derivatives (PIIDOs) 5.

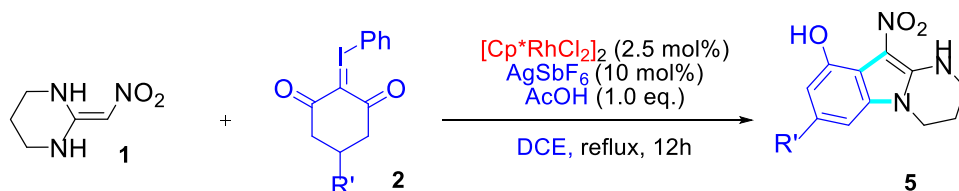

Enaminones (**1**, 1.1 mmol), iodonium ylides (**2**, 1.0 mmol),  $[\text{Cp}^*\text{RhCl}_2]_2$  (2.5 mol%),  $\text{AgSbF}_6$  (10.0 mol%), and acetic acid (1.0 mmol) were added to a 25 mL round-bottom flask. The mixture was stirred and heated under reflux in dichloroethane (5 mL) for 12 hours, or until the iodonium ylides were completely consumed. Following this, the mixture was cooled to room temperature, and dichloromethane (DCM, 15 mL  $\times$  2) was added. The organic layer was washed with a sodium chloride (NaCl) solution (10 mL), dried over sodium sulfate ( $\text{Na}_2\text{SO}_4$ ), concentrated, and purified by flash column chromatography to yield compounds **5**.

## 2.4 Synthesis of pyrimido[1,2-a]indole derivatives (PIIDOs) 3k.

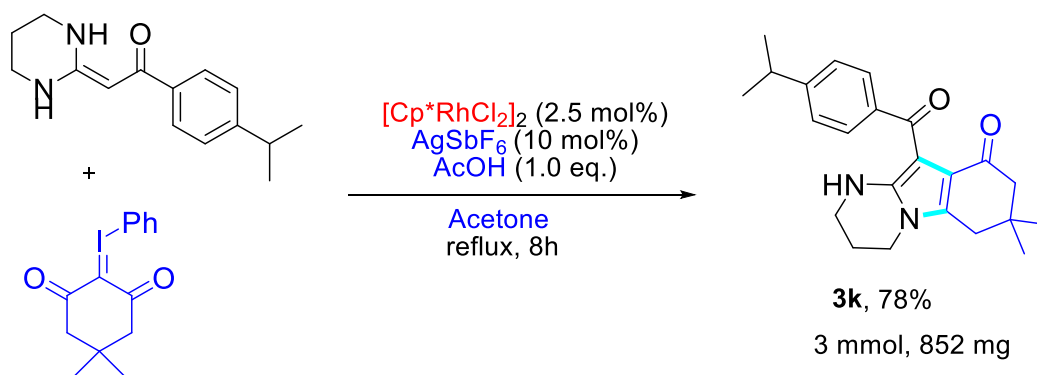

Enaminones (**1**, 3.3 mmol), iodonium ylides (**2**, 3.0 mmol),  $[\text{Cp}^*\text{RhCl}_2]_2$  (2.5 mol%),  $\text{AgSbF}_6$  (10.0 mol%), and acetic acid (HOAc, 3.0 mmol) were combined in a 25 mL round-bottom flask. The mixture was stirred and heated under reflux in acetone (10 mL) for 8 hours, or until the iodonium ylides were completely consumed. Subsequently, the mixture was allowed to cool to room temperature, followed by the addition of dichloromethane (DCM, 60 mL $\times$ 2). The organic phase was washed with a sodium chloride (NaCl) solution (30 mL), dried over sodium sulfate ( $\text{Na}_2\text{SO}_4$ ), concentrated, and purified by flash column chromatography to yield compound **3k** 852 mg, yield is 78%.

## 3. Spectroscopic Data.

### 10-(4-methylbenzoyl)-1,3,4,6,7,8-hexahydropyrimido[1,2-a]indol-9(2H)-one (3a)

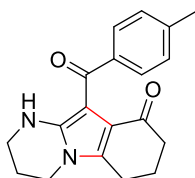

Yellow solid (70%, 215mg); Mp: 231.7-232.7 °C;  $^1\text{H}$  NMR (600 MHz,  $\text{DMSO-}d_6$ ):  $\delta$  = 2.00-2.05 (m, 2H,  $\text{CH}_2$ ), 2.19 (t,  $J$  = 6.12 Hz, 2H,  $\text{CH}_2$ ), 2.32 (s, 3H,  $\text{CH}_3$ ), 2.70 (t,  $J$  = 6.12 Hz, 2H,  $\text{CH}_2$ ), 3.34-3.36 (m, 2H,  $\text{CH}_2$ ), 3.88 (t,  $J$  = 5.94 Hz, 2H,  $\text{CH}_2$ ), 7.08 (d,  $J$  = 7.92 Hz, 2H, ArH), 7.38 (d,  $J$  = 7.98 Hz, 2H, ArH), 7.78 (s, 1H, NH);  $^{13}\text{C}$  NMR (150 MHz,  $\text{DMSO-}d_6$ ):  $\delta$  = 21.1, 21.1, 21.5, 22.6, 38.3, 38.4, 40.7, 96.6, 116.1, 128.1, 128.9, 139.6, 140.0, 142.1, 148.8, 187.9, 189.9. HRMS (TOF  $\text{ES}^+$ ):  $m/z$  calcd for  $\text{C}_{19}\text{H}_{20}\text{O}_2\text{N}_2\text{Na}$   $[(\text{M}+\text{Na})^+]$ , 331.1417; found, 331.1416.

### 10-(4-bromobenzoyl)-1,3,4,6,7,8-hexahydropyrimido[1,2-*a*]indol-9(2*H*)-one (3b)

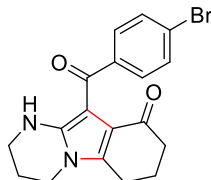

Yellow solid (85%, 316mg); Mp: 288.2-289.2 °C; <sup>1</sup>H NMR (500 MHz, CDCl<sub>3</sub>-*d*<sub>6</sub>): δ = 2.10-2.15 (m, 2H, CH<sub>2</sub>), 2.17-2.22 (m, 2H, CH<sub>2</sub>), 2.34 (t, *J* = 6.00 Hz, 2H, CH<sub>2</sub>), 2.66 (t, *J* = 6.15 Hz, 2H, CH<sub>2</sub>), 3.48-3.50 (m, 2H, CH<sub>2</sub>), 3.86 (t, *J* = 6.00 Hz, 2H, CH<sub>2</sub>), 7.43-7.47 (m, 4H, ArH), 7.94 (s, 1H, NH); <sup>13</sup>C NMR (125 MHz, CDCl<sub>3</sub>-*d*<sub>6</sub>): δ = 21.0, 21.4, 22.5, 38.0, 38.2, 40.5, 97.4, 116.3, 124.5, 129.9, 130.5, 141.3, 141.4, 149.3, 188.9, 190.8. HRMS (TOF ES<sup>+</sup>): *m/z* calcd for C<sub>18</sub>H<sub>17</sub>O<sub>2</sub>N<sub>2</sub> [(M+Na)<sup>+</sup>], 395.0366; found, 395.0365.

### 10-benzoyl-1,3,4,6,7,8-hexahydropyrimido[1,2-*a*]indol-9(2*H*)-one (3c)

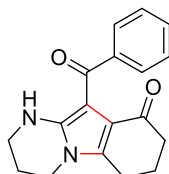

Yellow solid (82%, 241mg); Mp: 233.1-234.1 °C; <sup>1</sup>H NMR (600 MHz, CDCl<sub>3</sub>-*d*<sub>6</sub>): δ = 2.09-2.13 (m, 2H, CH<sub>2</sub>), 2.17-2.21 (m, 2H, CH<sub>2</sub>), 2.32 (t, *J* = 6.12 Hz, 2H, CH<sub>2</sub>), 2.65 (t, *J* = 6.12 Hz, 2H, CH<sub>2</sub>), 3.47-3.50 (m, 2H, CH<sub>2</sub>), 3.85 (t, *J* = 6.00 Hz, 2H, CH<sub>2</sub>), 7.33 (t, *J* = 7.68 Hz, 2H, ArH), 7.40 (t, *J* = 7.26 Hz, 1H, ArH), 7.56 (t, *J* = 7.08 Hz, 2H, ArH), 7.92 (s, 1H, NH); <sup>13</sup>C NMR (150 MHz, CDCl<sub>3</sub>-*d*<sub>6</sub>): δ = 21.1, 21.4, 22.6, 38.2, 40.5, 97.6, 116.6, 127.3, 128.1, 130.0, 140.8, 142.6, 149.0, 190.5, 190.6. HRMS (TOF ES<sup>+</sup>): *m/z* calcd for C<sub>18</sub>H<sub>19</sub>O<sub>2</sub>N<sub>2</sub> [(M+H)<sup>+</sup>], 295.1441; found, 295.1440.

### 10-(4-fluorobenzoyl)-1,3,4,6,7,8-hexahydropyrimido[1,2-*a*]indol-9(2*H*)-one (3d)

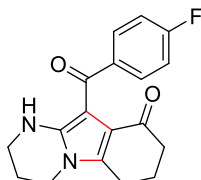

Yellow solid (85%, 265mg); Mp: 196.8-197.8 °C; <sup>1</sup>H NMR (500 MHz, DMSO-*d*<sub>6</sub>): δ = 1.99-2.04 (m, 2H, CH<sub>2</sub>), 2.18 (t, *J* = 6.05 Hz, 2H, CH<sub>2</sub>), 2.69 (t, *J* = 6.10 Hz, 2H, CH<sub>2</sub>), 3.36-3.38 (m, 2H, CH<sub>2</sub>), 3.88 (t, *J* = 5.95 Hz, 2H, CH<sub>2</sub>), 7.06-7.10 (m, 2H, ArH), 7.48-7.51 (m, 2H, ArH), 7.88 (s, 1H, NH); <sup>13</sup>C NMR (125 MHz, DMSO-*d*<sub>6</sub>): δ = 21.0, 21.1, 22.5, 38.3, 38.3, 40.2, 114.3 (d, *J* = 21.3 Hz), 131.0 (d, *J* = 8.8 Hz), 131.0 (d, *J* = 8.8 Hz), 139.4 (d, *J* = 3.8 Hz), 142.6, 149.1, 163.4 (d, *J* = 245.0 Hz), 186.5, 190.0; <sup>19</sup>F NMR (470 MHz, DMSO-*d*<sub>6</sub>): δ = -111.9. HRMS (TOF

ES<sup>+</sup>):  $m/z$  calcd for C<sub>18</sub>H<sub>17</sub>O<sub>2</sub>N<sub>2</sub>Na [(M+Na)<sup>+</sup>], 335.1166; found, 335.1165.

**10-(4-isopropylbenzoyl)-7-methyl-1,3,4,6,7,8-hexahydropyrimido[1,2-*a*]indol-9(2*H*)-one (3e)**

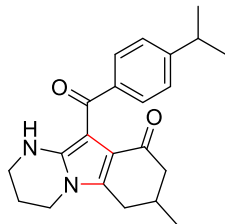

Yellow solid (84%, 294mg); Mp: 227.9-228.9 °C; <sup>1</sup>H NMR (500 MHz, CDCl<sub>3</sub>-*d*<sub>6</sub>):  $\delta$  = 1.26 (t,  $J$  = 5.95 Hz, 6H, 2CH<sub>3</sub>), 2.09-2.18 (m, 4H, 1CH<sub>3</sub>, 1CH<sub>2</sub>), 2.33-2.37 (m, 2H, CH<sub>2</sub>), 2.63-2.68 (m, 2H, CH<sub>2</sub>), 2.89-2.95 (m, 1H, CH<sub>2</sub>), 3.45-3.47 (m, 2H, CH<sub>2</sub>), 3.83-3.87 (m, 2H, CH<sub>2</sub>), 7.18 (d,  $J$  = 8.10 Hz, 2H, ArH), 7.54 (d,  $J$  = 8.20 Hz, 2H, ArH), 7.87 (s, 1H, NH); <sup>13</sup>C NMR (125 MHz, CDCl<sub>3</sub>-*d*<sub>6</sub>):  $\delta$  = 21.2, 21.4, 22.6, 23.8, 34.0, 38.2, 38.2, 40.5, 97.5, 116.7, 125.3, 128.6, 139.9, 140.6, 140.7, 148.9, 150.9, 190.1, 190.5. HRMS (TOF ES<sup>+</sup>):  $m/z$  calcd for C<sub>22</sub>H<sub>27</sub>O<sub>2</sub>N<sub>2</sub> [(M+H)<sup>+</sup>], 351.2067; found, 351.2063.

**10-(4-fluorobenzoyl)-7-methyl-1,3,4,6,7,8-hexahydropyrimido[1,2-*a*]indol-9(2*H*)-one (3f)**

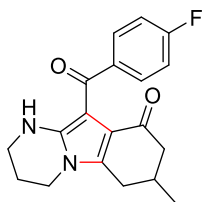

Yellow solid (85%, 277mg); Mp: 267.7-268.7 °C; <sup>1</sup>H NMR (500 MHz, DMSO-*d*<sub>6</sub>):  $\delta$  = 1.07 (d,  $J$  = 6.30 Hz, 3H, CH<sub>3</sub>), 1.98-2.09 (m, 3H, 2CH<sub>2</sub>), 2.16-2.20 (m, 1H, CH<sub>2</sub>), 2.25-2.36 (m, 2H, CH<sub>2</sub>), 2.82-2.85 (m, 1H, CH), 3.35-3.39 (m, 2H, CH<sub>2</sub>), 3.82-3.93 (m, 2H, CH<sub>2</sub>), 7.06-7.10 (m, 2H, ArH), 7.47-7.50 (m, 2H, ArH), 7.86 (s, 1H, NH); <sup>13</sup>C NMR (125 MHz, DMSO-*d*<sub>6</sub>):  $\delta$  = 21.0, 21.3, 29.1, 30.5, 38.3, 40.2, 46.8, 96.5, 114.3 (d,  $J$  = 21.3 Hz), 115.4, 131.0 (d,  $J$  = 8.8 Hz), 139.4 (d,  $J$  = 2.5 Hz), 142.1, 149.3, 163.4 (d,  $J$  = 245.0 Hz), 186.5, 189.9; <sup>19</sup>F NMR (470 MHz, DMSO-*d*<sub>6</sub>):  $\delta$  = -111.9. HRMS (TOF ES<sup>+</sup>):  $m/z$  calcd for C<sub>19</sub>H<sub>20</sub>O<sub>2</sub>N<sub>2</sub>F[(M+H)<sup>+</sup>], 327.1503; found, 327.1501.

**10-(4-isopropylbenzoyl)-7-phenyl-1,3,4,6,7,8-hexahydropyrimido[1,2-*a*]indol-9(2*H*)-one (3g)**



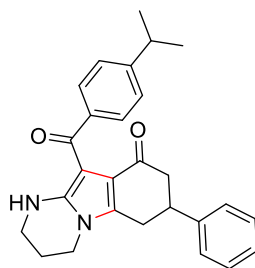

Yellow solid (79%, 325mg); Mp:197.9-198.9 °C; <sup>1</sup>H NMR (500 MHz, CDCl<sub>3</sub>-d<sub>6</sub>): δ = 1.24-1.27 (m, 6H, 2CH<sub>3</sub>), 2.16 (t, *J* = 5.75 Hz, 2H, 1CH<sub>2</sub>), 2.63 (t, *J* = 2.90 Hz, 2H, CH<sub>2</sub>), 2.79-2.84 (m, 1H, CH), 2.91-2.99 (m, 2H, CH<sub>2</sub>), 3.44-3.54 (m, 3H, 1CH<sub>2</sub>, 1CH<sub>2</sub>), 3.78-3.86 (m, 2H, CH<sub>2</sub>), 7.20 (d, *J* = 8.15 Hz, 2H, ArH), 7.26 (d, *J* = 5.90 Hz, 1H, ArH), 7.30 (d, *J* = 7.55 Hz, 2H, ArH), 7.35 (t, *J* = 7.45 Hz, 2H, ArH), 7.56 (d, *J* = 8.20 Hz, 2H, ArH), 7.88 (s, 1H, NH); <sup>13</sup>C NMR (125 MHz, CDCl<sub>3</sub>-d<sub>6</sub>): δ = 21.2, 23.8, 23.9, 29.4, 34.0, 38.2, 40.6, 41.1, 45.2, 97.4, 116.4, 125.4, 126.8, 127.1, 128.7, 128.8, 139.8, 143.2, 149.2, 151.0, 189.3, 190.2. HRMS (TOF ES<sup>+</sup>): *m/z* calcd for C<sub>27</sub>H<sub>29</sub>O<sub>2</sub>N<sub>2</sub> [(M+H)<sup>+</sup>], 413.2224; found, 413.2222.

**10-(4-chlorobenzoyl)-7-phenyl-1,3,4,6,7,8-hexahydropyrimido[1,2-a]indol-9(2H)-one (3h)**

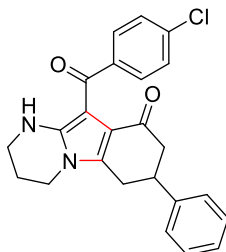

Yellow solid (85%, 343mg); Mp: 198.7-199.7 °C; <sup>1</sup>H NMR (600 MHz, CDCl<sub>3</sub>-d<sub>6</sub>): δ = 2.03 (t, *J* = 5.70 Hz, 2H, CH<sub>2</sub>), 2.31-2.34 (m, 1H, CH<sub>2</sub>), 2.59-2.63 (m, 1H, CH<sub>2</sub>), 2.85-2.89 (m, 1H, CH<sub>2</sub>), 3.03-3.06 (m, 1H, CH<sub>2</sub>), 3.36-3.40 (m, 2H, CH<sub>2</sub>), 3.45-3.49 (m, 1H, CH), 3.83-3.86 (m, 1H, CH<sub>2</sub>), 3.93-3.96 (m, 1H, CH<sub>2</sub>), 7.25 (t, *J* = 7.32 Hz, 1H, ArH), 7.33-7.36 (m, 6H, ArH), 7.46-7.48 (m, 2H, ArH), 7.95 (s, 1H, NH); <sup>13</sup>C NMR (150 MHz, CDCl<sub>3</sub>-d<sub>6</sub>): δ = 20.9, 28.9, 38.3, 40.2, 40.5, 45.3, 96.5, 115.4, 127.1, 127.5, 127.6, 128.9, 130.4, 134.6, 141.7, 142.0, 144.1, 149.5, 186.5, 189.0. HRMS (TOF ES<sup>+</sup>): *m/z* calcd for C<sub>24</sub>H<sub>22</sub>ClO<sub>2</sub>N<sub>2</sub> [(M+H)<sup>+</sup>], 405.1364; found, 405.1364.

**10-(4-fluorobenzoyl)-7-phenyl-1,3,4,6,7,8-hexahydropyrimido[1,2-a]indol-9(2H)-one (3i)**

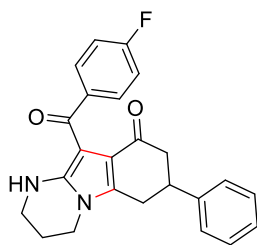

Yellow solid (86%, 333mg); Mp: 256.4-257.4 °C; <sup>1</sup>H NMR (500 MHz, DMSO-*d*<sub>6</sub>): δ = 2.03 (s, 2H, CH<sub>2</sub>), 2.33 (d, *J* = 13.75 Hz, 1H, CH<sub>2</sub>), 2.62 (t, *J* = 15.60 Hz, 1H, CH<sub>2</sub>), 2.87-2.90 (m, 1H, CH<sub>2</sub>), 3.03-3.07 (m, 1H, CH<sub>2</sub>), 3.36 (s, 2H, CH<sub>2</sub>), 3.48 (d, *J* = 10.75 Hz, 1H, CH<sub>2</sub>), 3.84 (t, *J* = 5.80 Hz, 1H, CH<sub>2</sub>), 3.95 (t, *J* = 6.15 Hz, 1H, CH<sub>2</sub>), 7.11 (t, *J* = 8.55 Hz, 2H, ArH), 7.26 (t, *J* = 6.90 Hz, 1H, ArH), 7.34-7.41 (m, 4H, ArH), 7.53 (d, *J* = 5.70 Hz, 2H, ArH), 7.92 (s, 1H, NH); <sup>13</sup>C NMR (125 MHz, DMSO-*d*<sub>6</sub>): δ = 21.0, 28.9, 38.3, 39.8, 40.2, 45.5, 96.5, 114.3 (d, *J* = 21.3 Hz), 115.5, 127.1, 127.5, 128.9, 131.0 (d, *J* = 8.8 Hz), 139.3, 141.8, 144.1, 149.4, 163.5 (d, *J* = 245.0 Hz), 186.6, 189.0; <sup>19</sup>F NMR (470 MHz, DMSO-*d*<sub>6</sub>): δ = -111.7. HRMS (TOF ES<sup>+</sup>): *m/z* calcd for C<sub>24</sub>H<sub>22</sub>O<sub>2</sub>N<sub>2</sub>F [(M+H)<sup>+</sup>], 389.1660; found, 389.1664.

**10-(4-methoxybenzoyl)-7,7-dimethyl-1,3,4,6,7,8-hexahydropyrimido[1,2-*a*]indol-9(2*H*)-one (3j)**

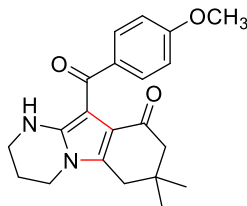

Yellow solid (88%, 309mg); Mp: 221.7-222.7 °C; <sup>1</sup>H NMR (600 MHz, CDCl<sub>3</sub>-*d*<sub>6</sub>): δ = 1.13 (s, 6H, 2CH<sub>3</sub>), 2.19 (t, *J* = 5.76 Hz, 2H, CH<sub>2</sub>), 2.26 (s, 2H, CH<sub>2</sub>), 2.54 (s, 2H, CH<sub>2</sub>), 3.46-3.48 (m, 2H, CH<sub>2</sub>), 3.83 (t, *J* = 6.06 Hz, 5H, 1CH<sub>2</sub>, 1CH<sub>3</sub>), 6.82-6.84 (m, 2H, ArH), 7.56-7.58 (m, 2H, ArH), 5.60 (s, 1H, NH); <sup>13</sup>C NMR (150 MHz, CDCl<sub>3</sub>-*d*<sub>6</sub>): δ = 21.2, 28.7, 35.0, 35.4, 38.2, 40.5, 52.7, 55.2, 97.2, 112.5, 115.5, 130.5, 134.9, 139.1, 148.9, 161.3, 189.4, 190.6. HRMS (TOF ES<sup>+</sup>): *m/z* calcd for C<sub>21</sub>H<sub>25</sub>O<sub>3</sub>N<sub>2</sub> [(M+H)<sup>+</sup>], 353.1860; found, 353.1861.

**10-(4-isopropylbenzoyl)-7,7-dimethyl-1,3,4,6,7,8-hexahydropyrimido[1,2-*a*]indol-9(2*H*)-one (3k)**

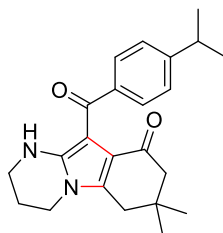

Yellow solid (82%, 298mg); Mp: 225.2-226.2 °C; <sup>1</sup>H NMR (500 MHz, DMSO-*d*<sub>6</sub>): δ = 1.07 (d, *J* = 11.9 Hz, 6H, 2CH<sub>3</sub>), 1.15-1.21 (m, 6H, 2CH<sub>3</sub>), 1.99-2.04 (m, 2H, CH<sub>2</sub>), 2.12 (s, 2H, CH<sub>2</sub>), 3.03-3.07 (m, 1H, CH<sub>2</sub>), 2.61 (s, 2H, CH<sub>2</sub>), 2.87-2.92 (m, 1H, CH), 3.33-3.37 (m, 2H, CH<sub>2</sub>), 3.86 (t, *J* = 5.95 Hz, 2H, CH<sub>2</sub>), 7.13 (d, *J* = 8.15 Hz, 2H, ArH), 7.26 (t, *J* = 6.90 Hz, 1H, ArH), 7.38 (d, *J* = 8.20 Hz, 2H, ArH), 7.78 (s, 1H, NH); <sup>13</sup>C NMR (125 MHz, DMSO-*d*<sub>6</sub>): δ = 21.1, 24.2, 28.7, 33.8, 34.8, 35.0, 38.3, 40.2, 52.7, 60.2, 96.4, 114.7, 125.4, 129.0, 140.3, 140.4, 149.0, 150.4, 187.8, 189.9. HRMS (TOF ES<sup>+</sup>): *m/z* calcd for C<sub>23</sub>H<sub>29</sub>O<sub>2</sub>N<sub>2</sub> [(M+H)<sup>+</sup>], 365.2224; found, 365.2221.

**10-(4-fluorobenzoyl)-7,7-dimethyl-1,3,4,6,7,8-hexahydropyrimido[1,2-*a*]indol-9(2*H*)-one (3l)**

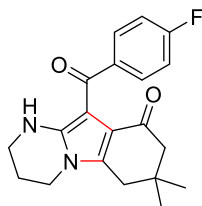

Yellow solid (89%, 302mg); Mp: 244.4-245.4 °C; <sup>1</sup>H NMR (500 MHz, DMSO-*d*<sub>6</sub>): δ = 1.06 (s, 6H, 2CH<sub>3</sub>), 2.03 (t, *J* = 5.60 Hz, 2H, CH<sub>2</sub>), 2.12 (s, 2H, CH<sub>2</sub>), 2.50-2.52 (m, 2H, CH<sub>2</sub>), 3.87 (d, *J* = 5.90 Hz, 2H, CH<sub>2</sub>), 7.07-7.10 (m, 2H, ArH), 7.45-7.48 (m, 2H, ArH), 7.86 (s, 1H, NH); <sup>13</sup>C NMR (125 MHz, DMSO-*d*<sub>6</sub>): δ = 21.0, 28.7, 34.7, 35.0, 38.2, 39.9, 52.7, 96.4, 114.2, 114.4, 130.9 (d, *J* = 8.8 Hz), 139.4 130.9 (d, *J* = 2.5 Hz), 140.9, 149.3, 163.4 (d, *J* = 245.0 Hz), 186.6, 190.0. HRMS (TOF ES<sup>+</sup>): *m/z* calcd for C<sub>20</sub>H<sub>22</sub>O<sub>2</sub>N<sub>2</sub>F [(M+H)<sup>+</sup>], 341.1660; found, 341.1655.

**10-(4-fluorobenzoyl)-7,7-dimethyl-1,3,4,6,7,8-hexahydropyrimido[1,2-*a*]indol-9(2*H*)-one (3m)**

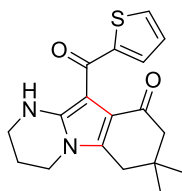

Yellow solid (72%, 236mg); Mp: 246.4-247.4 °C; <sup>1</sup>H NMR (500 MHz, DMSO-*d*<sub>6</sub>): δ = 1.09 (s, 6H, 2CH<sub>3</sub>), 2.00-2.03 (m, 2H, CH<sub>2</sub>), 2.21 (s, 2H, CH<sub>2</sub>), 2.62 (s, 2H, CH<sub>2</sub>), 3.86 (d, *J* = 5.90 Hz, 2H, CH<sub>2</sub>), 7.00-7.01 (m, 1H, ArH), 7.14-7.15 (m, 1H, ArH), 7.59 (s, 1H, NH), 7.64-7.65 (m, 1H, ArH); <sup>13</sup>C NMR (125 MHz, DMSO-*d*<sub>6</sub>): δ = 21.1, 28.8, 34.8, 35.0, 38.3, 39.9, 52.7, 96.3, 114.7, 127.4, 130.3, 131.3, 141.3, 146.9, 148.9, 179.4, 190.2. HRMS (TOF ES<sup>+</sup>): *m/z* calcd for C<sub>18</sub>H<sub>21</sub>O<sub>2</sub>N<sub>2</sub>S [(M+H)<sup>+</sup>], 329.1318; found, 329.1316.

**11-(4-methylbenzoyl)-1,2,3,4,6,7,8,9-octahydro-10H-cyclohepta[4,5]pyrrolo[1,2-a]pyrimidin-10-one (3n)**

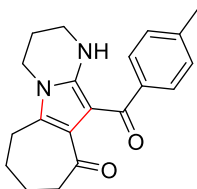

Yellow solid (20%, 64mg); Mp: 198.7-199.7 °C; <sup>1</sup>H NMR (600 MHz, CDCl<sub>3</sub>-d<sub>6</sub>): δ = 1.86-1.92 (m, 4H, 2CH<sub>2</sub>), 2.17 (t, *J* = 5.76 Hz, 2H, CH<sub>2</sub>), 2.33 (s, 3H, CH<sub>3</sub>), 2.53 (t, *J* = 6.54 Hz, 2H, CH<sub>2</sub>), 2.74 (t, *J* = 5.76 Hz, 2H, CH<sub>2</sub>), 3.41-3.44 (m, 2H, CH<sub>2</sub>), 3.80 (t, *J* = 6.06 Hz, 2H, CH<sub>2</sub>), 7.10 (d, *J* = 7.92 Hz, 2H, ArH), 7.43 (d, *J* = 7.98 Hz, 2H, ArH), 7.58 (s, 1H, NH); <sup>13</sup>C NMR (150 MHz, CDCl<sub>3</sub>-d<sub>6</sub>): δ = 21.5, 21.5, 22.4, 25.0, 25.7, 37.9, 40.5, 44.2, 99.4, 121.3, 127.7, 128.3, 132.8, 139.8, 139.9, 147.8, 190.0, 197.6. HRMS (TOF ES<sup>+</sup>): *m/z* calcd for C<sub>20</sub>H<sub>23</sub>O<sub>2</sub>N<sub>2</sub> [(M+H)<sup>+</sup>], 323.1754; found, 323.1760.

**9-(4-methoxybenzoyl)-1,2,3,5,6,7-hexahydro-8H-imidazo[1,2-a]indol-8-one (3o)**

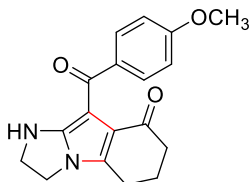

Yellow solid (80%, 248mg); Mp: 273.9-274.9 °C; <sup>1</sup>H NMR (500 MHz, DMSO-*d*<sub>6</sub>): δ = 1.98-2.03 (m, 2H, CH<sub>2</sub>), 2.21 (t, *J* = 6.00 Hz, 2H, CH<sub>2</sub>), 2.71 (t, *J* = 6.05 Hz, 2H, CH<sub>2</sub>), 3.79 (s, 3H, OCH<sub>3</sub>), 3.90 (t, *J* = 7.90 Hz, 2H, CH<sub>2</sub>), 4.04-4.07 (m, 2H, CH<sub>2</sub>), 6.71 (s, 1H, NH), 6.85-6.87 (m, 2H, ArH), 7.55-7.58 (m, 2H, ArH); <sup>13</sup>C NMR (125 MHz, DMSO-*d*<sub>6</sub>): δ = 21.7, 23.0, 38.3, 42.4, 49.1, 55.6, 95.5, 113.0, 119.8, 131.2, 133.9, 139.1, 154.4, 161.6, 187.2, 190.1. HRMS (TOF ES<sup>+</sup>): *m/z* calcd for C<sub>18</sub>H<sub>19</sub>O<sub>3</sub>N<sub>2</sub> [(M+H)<sup>+</sup>], 311.1390; found, 311.1388.

**6-methyl-9-(4-methylbenzoyl)-1,2,3,5,6,7-hexahydro-8H-imidazo[1,2-a]indol-8-one (3p)**

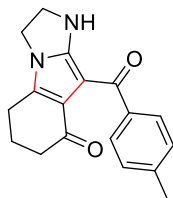

Yellow solid (70%, 205mg); Mp: 232.7-233.7 °C; <sup>1</sup>H NMR (500 MHz, CDCl<sub>3</sub>-d<sub>6</sub>): δ = 2.11 (t, *J* = 6.30 Hz, 2H, CH<sub>2</sub>), 2.36 (t, *J* = 4.80 Hz, 5H, CH<sub>3</sub>, CH<sub>2</sub>), 2.68 (t, *J* = 6.20 Hz, 2H, CH<sub>2</sub>), 4.00-4.07 (m, 4H, 2CH<sub>2</sub>), 5.60 (s, 1H, NH), 7.15 (d, *J* = 7.85 Hz, 2H, ArH), 7.57 (d, *J* = 8.10 Hz, 2H, ArH); <sup>13</sup>C NMR (125 MHz, CDCl<sub>3</sub>-d<sub>6</sub>): δ = 21.7, 22.0, 22.9, 38.2, 42.4, 48.9, 97.0, 120.2,

128.1, 128.9, 138.1, 138.3, 140.0, 154.7, 190.3, 191.0. HRMS (TOF ES<sup>+</sup>):  $m/z$  calcd for C<sub>18</sub>H<sub>19</sub>O<sub>2</sub>N<sub>2</sub> [(M+H)<sup>+</sup>], 295.1441; found, 295.1440.

**9-(4-chloro-3-methylbenzoyl)-6-methyl-1,2,3,5,6,7-hexahydro-8H-imidazo[1,2-a]indol-8-one (3q)**

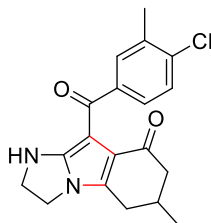

Yellow solid (86%, 294mg); Mp: 244.6-245.6 °C; <sup>1</sup>H NMR (600 MHz, DMSO-*d*<sub>6</sub>):  $\delta$  = 1.07 (d,  $J$  = 6.54 Hz, 3H, CH<sub>3</sub>), 2.00-2.05 (m, 1H, CH<sub>2</sub>), 2.17-2.20 (m, 1H, CH<sub>2</sub>), 2.27-2.33 (m, 4H, 1CH<sub>3</sub>, 1CH), 2.36-2.41 (m, 1H, CH<sub>2</sub>), 2.79-2.83 (m, 1H, CH<sub>2</sub>), 3.92-3.96 (m, 2H, CH<sub>2</sub>), 4.02-4.09 (m, 2H, CH<sub>2</sub>), 6.95 (s, 1H, NH), 7.32 (s, 2H, ArH), 7.48 (s, 1H, ArH); <sup>13</sup>C NMR (150 MHz, DMSO-*d*<sub>6</sub>):  $\delta$  = 20.0, 21.2, 29.6, 30.9, 42.3, 46.7, 49.1, 95.3, 119.0, 128.2, 131.5, 134.6, 135.5, 139.2, 140.6, 155.2, 187.0, 190.0. HRMS (TOF ES<sup>+</sup>):  $m/z$  calcd for C<sub>19</sub>H<sub>19</sub>O<sub>2</sub>N<sub>2</sub>ClNa [(M+Na)<sup>+</sup>], 365.1027; found, 365.1031.

**6,6-dimethyl-9-(4-methylbenzoyl)-1,2,3,5,6,7-hexahydro-8H-imidazo[1,2-a]indol-8-one (3r)**

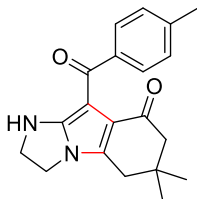

Yellow solid (80%, 257mg); <sup>1</sup>H NMR (500 MHz, CDCl<sub>3</sub>-*d*<sub>6</sub>):  $\delta$  = 0.81 (s, 6H, 2CH<sub>3</sub>), 1.92 (s, 2H, CH<sub>2</sub>), 2.06 (s, 3H, CH<sub>3</sub>), 2.29 (s, 2H, CH<sub>2</sub>), 2.66 (s, 2H, CH<sub>2</sub>), 3.74-3.78 (m, 4H, 2CH<sub>2</sub>), 5.68 (s, 1H, NH), 6.81 (d,  $J$  = 7.90 Hz, 2H, ArH), 7.22 (d,  $J$  = 8.05 Hz, 2H, ArH); <sup>13</sup>C NMR (125 MHz, CDCl<sub>3</sub>-*d*<sub>6</sub>):  $\delta$  = 21.4, 28.3, 35.2, 35.5, 42.1, 48.7, 52.4, 96.1, 118.5, 127.8, 128.6, 136.7, 138.2, 140.4, 154.6, 189.2, 190.3. HRMS (TOF ES<sup>+</sup>):  $m/z$  calcd for C<sub>20</sub>H<sub>23</sub>O<sub>2</sub>N<sub>2</sub> [(M+H)<sup>+</sup>], 323.1754; found, 323.1753.

**10-(4-isopropylbenzoyl)-1,2,3,4,8,9-hexahydropyrimido[1,2-a]indol-6(7H)-one (4a)**

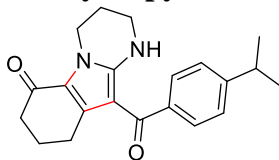

Yellow solid (48%, 161mg); Mp: 242.9-243.9 °C; <sup>1</sup>H NMR (500 MHz, CDCl<sub>3</sub>-*d*<sub>6</sub>):  $\delta$  = 1.28 (d,  $J$  = 6.90 Hz, 6H, 2CH<sub>3</sub>), 1.82 (t,  $J$  = 6.15 Hz, 2H, CH<sub>2</sub>), 2.11 (t,  $J$  = 5.75 Hz, 2H, CH<sub>2</sub>), 2.20 (t,  $J$

= 5.95 Hz, 2H, CH<sub>2</sub>), 2.37 (t, *J* = 6.00 Hz, 2H, CH<sub>2</sub>), 2.96 (t, *J* = 6.90 Hz, 1H, CH), 3.47-3.49 (m, 2H, CH<sub>2</sub>), 4.39 (t, *J* = 5.95 Hz, 2H, CH<sub>2</sub>), 7.27 (d, *J* = 7.15 Hz, 2H, ArH), 7.42-7.44 (m, 2H, ArH), 7.76 (s, 1H, NH); <sup>13</sup>C NMR (125 MHz, CDCl<sub>3</sub>-*d*<sub>6</sub>): δ = 20.9, 23.9, 24.7, 25.2, 34.1, 38.1, 38.2, 42.5, 103.8, 121.9, 126.2, 127.6, 138.5, 139.3, 149.8, 151.6, 187.0, 192.2. HRMS (TOF ES<sup>+</sup>): *m/z* calcd for C<sub>21</sub>H<sub>24</sub>O<sub>2</sub>N<sub>2</sub>Na [(M+Na)<sup>+</sup>], 359.1730; found, 359.1735.

**10-(4-methylbenzoyl)-1,2,3,4,8,9-hexahydropyrimido[1,2-*a*]indol-6(7*H*)-one (4b)**

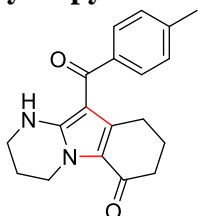

Yellow solid (52%, 160mg); Mp: 225.8–226.8 °C; <sup>1</sup>H NMR (600 MHz, DMSO-*d*<sub>6</sub>): δ = 1.70-1.74 (m, 2H, CH<sub>2</sub>), 1.95-1.99 (m, 2H, CH<sub>2</sub>), 2.08 (t, *J* = 6.00 Hz, 2H, CH<sub>2</sub>), 2.24 (t, *J* = 5.94 Hz, 2H, CH<sub>2</sub>), 2.37 (s, 3H, CH<sub>3</sub>), 3.36-3.39 (m, 2H, CH<sub>2</sub>), 4.22 (t, *J* = 5.88 Hz, 2H, CH<sub>2</sub>), 7.26 (d, *J* = 7.80 Hz, 2H, ArH), 7.35 (d, *J* = 7.98 Hz, 2H, ArH), 7.89 (s, 1H, NH); <sup>13</sup>C NMR (150 MHz, DMSO-*d*<sub>6</sub>): δ = 20.8, 21.5, 24.6, 25.1, 38.1, 42.8, 103.4, 121.5, 127.7, 129.1, 137.6, 139.6, 140.4, 149.5, 185.7, 190.6. HRMS (TOF ES<sup>+</sup>): *m/z* calcd for C<sub>19</sub>H<sub>20</sub>O<sub>2</sub>N<sub>2</sub>Na [(M+Na)<sup>+</sup>], 331.1417; found, 331.1413.

**10-benzoyl-1,2,3,4,8,9-hexahydropyrimido[1,2-*a*]indol-6(7*H*)-one (4c)**

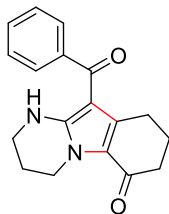

Yellow solid (65%, 191mg); Mp: 200.6–201.6 °C; <sup>1</sup>H NMR (600 MHz, CDCl<sub>3</sub>-*d*<sub>6</sub>): δ = 1.17-1.83 (m, 2H, CH<sub>2</sub>), 2.05-2.14 (m, 4H, 2CH<sub>2</sub>), 2.36 (t, *J* = 6.18 Hz, 2H, CH<sub>2</sub>), 3.48-3.50 (m, 2H, CH<sub>2</sub>), 4.39 (t, *J* = 5.94 Hz, 2H, CH<sub>2</sub>), 7.41-7.48 (m, 5H, ArH), 7.79 (s, 1H, NH); <sup>13</sup>C NMR (150 MHz, CDCl<sub>3</sub>-*d*<sub>6</sub>): δ = 20.9, 24.6, 25.0, 38.1, 38.2, 42.5, 103.8, 122.1, 127.3, 128.2, 130.3, 138.3, 141.8, 149.8, 187.0, 190.1. HRMS (TOF ES<sup>+</sup>): *m/z* calcd for C<sub>18</sub>H<sub>19</sub>O<sub>2</sub>N<sub>2</sub> [(M+H)<sup>+</sup>], 295.1441; found, 295.1443.

**10-(4-bromobenzoyl)-1,2,3,4,8,9-hexahydropyrimido[1,2-*a*]indol-6(7*H*)-one (4d)**

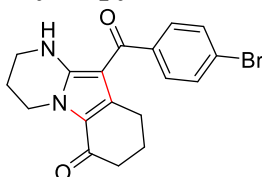

Yellow solid (66%, 245mg); Mp: 231.7–232.7 °C; <sup>1</sup>H NMR (500 MHz, CDCl<sub>3</sub>-d<sub>6</sub>): δ = 1.81-1.86 (m, 2H, CH<sub>2</sub>), 2.05-2.15 (m, 4H, 2CH<sub>2</sub>), 2.38 (t, *J* = 6.05 Hz, 2H, CH<sub>2</sub>), 3.48-3.50 (m, 2H, CH<sub>2</sub>), 4.38 (t, *J* = 5.95 Hz, 2H, CH<sub>2</sub>), 7.35-7.39 (m, 2H, ArH), 7.53-7.58 (m, 2H, ArH), 7.77 (s, 1H, NH); <sup>13</sup>C NMR (125 MHz, CDCl<sub>3</sub>-d<sub>6</sub>): δ = 20.9, 24.5, 25.2, 38.1, 38.1, 42.5, 103.6, 122.2, 124.8, 129.1, 131.4, 137.8, 140.5, 149.9, 187.2, 190.6. HRMS (TOF ES<sup>+</sup>): *m/z* calcd for C<sub>18</sub>H<sub>17</sub>O<sub>2</sub>N<sub>2</sub>BrNa [(M+Na)<sup>+</sup>], 395.0366; found, 395.0364.

**10-(4-fluorobenzoyl)-1,2,3,4,8,9-hexahydropyrimido[1,2-*a*]indol-6(7*H*)-one (4e)**

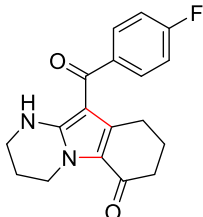

Yellow solid (68%, 212mg); Mp: 206.8–207.8 °C; <sup>1</sup>H NMR (500 MHz, CDCl<sub>3</sub>-d<sub>6</sub>): δ = 1.82-1.86 (m, 2H, CH<sub>2</sub>), 2.10-2.17 (m, 4H, 2CH<sub>2</sub>), 2.38 (t, *J* = 6.10 Hz, 2H, CH<sub>2</sub>), 3.48-3.50 (m, 2H, CH<sub>2</sub>), 4.39 (t, *J* = 5.95 Hz, 2H, CH<sub>2</sub>), 7.09-7.14 (m, 2H, ArH), 7.48-7.52 (m, 2H, ArH), 7.74 (s, 1H, NH); <sup>13</sup>C NMR (125 MHz, CDCl<sub>3</sub>-d<sub>6</sub>): δ = 20.9, 24.6, 25.2, 38.1, 38.2, 42.5, 103.7, 115.2 (d, *J* = 22.5 Hz), 122.1, 129.7 (d, *J* = 7.5 Hz), 137.9 (d, *J* = 3.8 Hz), 137.9, 149.8, 164.0 (d, *J* = 248.8 Hz), 187.1, 190.7; <sup>19</sup>F NMR (470 MHz, CDCl<sub>3</sub>-d<sub>6</sub>): δ = -109.6. HRMS (TOF ES<sup>+</sup>): *m/z* calcd for C<sub>18</sub>H<sub>17</sub>O<sub>2</sub>N<sub>2</sub>FNa [(M+Na)<sup>+</sup>], 335.1173; found, 335.1175.

**10-(4-fluorobenzoyl)-8-methyl-1,2,3,4,8,9-hexahydropyrimido[1,2-*a*]indol-6(7*H*)-one (4f)**

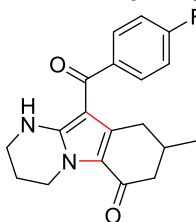

Yellow solid (62%, 202mg); Mp: 222.6–223.6 °C; <sup>1</sup>H NMR (500 MHz, CDCl<sub>3</sub>-d<sub>6</sub>): δ = 0.92 (d, *J* = 6.25 Hz, 3H, CH<sub>3</sub>), 1.94 (t, *J* = 9.20 Hz, 1H, CH<sub>2</sub>), 2.06-2.18 (m, 5H, CH<sub>2</sub>), 2.36-2.40 (m, 1H, CH), 3.46-3.51 (m, 2H, CH<sub>2</sub>), 4.36-4.40 (m, 2H, CH<sub>2</sub>), 7.10-7.13 (m, 2H, ArH), 7.50-7.52 (m, 2H, ArH), 7.72 (s, 1H, NH); <sup>13</sup>C NMR (125 MHz, CDCl<sub>3</sub>-d<sub>6</sub>): δ = 20.9, 21.0, 32.3, 33.3, 38.1, 42.4, 46.4, 103.6, 115.2 (d, *J* = 10.2 Hz), 121.9, 129.8 (d, *J* = 8.8 Hz), 137.3, 137.8 (d, *J* = 3.8 Hz), 150.0, 164.1 (d, *J* = 248.8 Hz), 186.8, 190.6; <sup>19</sup>F NMR (470 MHz, CDCl<sub>3</sub>-d<sub>6</sub>): δ = -109.5. HRMS (TOF ES<sup>+</sup>): *m/z* calcd for C<sub>19</sub>H<sub>19</sub>O<sub>2</sub>N<sub>2</sub>FNa [(M+Na)<sup>+</sup>], 349.1323; found, 349.1324.

**10-(4-chlorobenzoyl)-8-phenyl-1,2,3,4,8,9-hexahydropyrimido[1,2-*a*]indol-6(7*H*)-one (4g)**

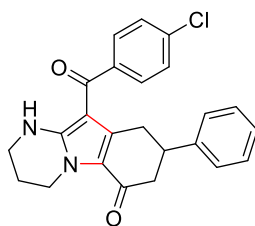

Yellow solid (66%, 266mg); Mp: 242.9–243.8 °C; <sup>1</sup>H NMR (600 MHz, DMSO-*d*<sub>6</sub>): δ = 1.96-2.01 (m, 2H, CH<sub>2</sub>), 2.13-2.16 (m, 1H, CH<sub>2</sub>), 2.35-2.38 (m, 1H, CH<sub>2</sub>), 2.50-2.56 (m, 1H, CH<sub>2</sub>), 2.66-2.70 (m, 1H, CH<sub>2</sub>), 3.16-3.20 (m, 1H, CH<sub>2</sub>), 3.37-3.43 (m, 2H, CH<sub>2</sub>), 4.25 (t, *J* = 6.36 Hz, 2H, CH<sub>2</sub>), 7.15-7.18 (m, 3H, ArH), 7.25 (t, *J* = 7.44 Hz, 2H, ArH), 7.46-7.50 (m, 4H, ArH), 7.97 (s, 1H, NH); <sup>13</sup>C NMR (150 MHz, DMSO-*d*<sub>6</sub>): δ = 20.7, 32.3, 38.2, 42.3, 42.7, 45.1, 103.3, 121.6, 127.0, 127.2, 128.7, 128.9, 129.7, 135.4, 136.3, 140.8, 144.3, 149.9, 184.7, 189.0. HRMS (TOF ES<sup>+</sup>): *m/z* calcd for C<sub>24</sub>H<sub>22</sub>ClO<sub>2</sub>N<sub>2</sub> [(M+H)<sup>+</sup>], 405.1364; found, 405.1364.

**10-(4-fluorobenzoyl)-8-phenyl-1,2,3,4,8,9-hexahydropyrimido[1,2-*a*]indol-6(7H)-one (4h)**

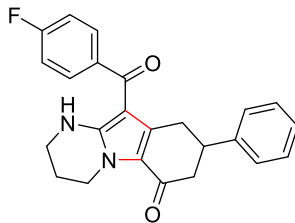

Yellow solid (69%, 267mg); Mp: 226.8–227.8 °C; <sup>1</sup>H NMR (500 MHz, CDCl<sub>3</sub>-*d*<sub>6</sub>): δ = 2.05-2.17 (m, 2H, CH<sub>2</sub>), 2.35-2.39 (m, 1H, CH<sub>2</sub>), 2.52-2.71 (m, 3H, CH<sub>2</sub>), 3.19-3.25 (m, 1H, CH), 3.46-3.55 (m, 2H, CH<sub>2</sub>), 4.38-4.45 (m, 2H, CH<sub>2</sub>), 7.05-7.11 (m, 4H, ArH), 7.19-7.22 (m, 1H, ArH), 7.28 (t, *J* = 7.25 Hz, 2H, ArH), 7.50-7.54 (m, 2H, ArH), 7.74 (s, 1H, NH); <sup>13</sup>C NMR (125 MHz, CDCl<sub>3</sub>-*d*<sub>6</sub>): δ = 20.9, 32.3, 38.2, 42.5, 42.8, 45.3, 103.7, 115.3 (d, *J* = 21.3 Hz), 121.9, 126.7, 126.8, 128.6, 129.8 (d, *J* = 7.5 Hz), 136.8, 137.6 (d, *J* = 2.5 Hz), 143.4, 150.2, 163.2 (d, *J* = 248.8 Hz), 185.7, 190.5; <sup>19</sup>F NMR (470 MHz, CDCl<sub>3</sub>-*d*<sub>6</sub>): δ = -109.0. HRMS (TOF ES<sup>+</sup>): *m/z* calcd for C<sub>24</sub>H<sub>21</sub>O<sub>2</sub>N<sub>2</sub>FN<sub>a</sub> [(M+Na)<sup>+</sup>], 411.1479; found, 411.1476.

**10-(4-fluorobenzoyl)-8,8-dimethyl-1,2,3,4,8,9-hexahydropyrimido[1,2-*a*]indol-6(7H)-one (4i)**

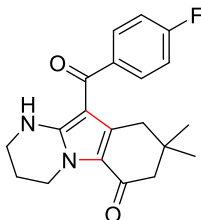

Yellow solid (70%, 238mg); Mp: 216.2–217.2 °C; <sup>1</sup>H NMR (500 MHz, DMSO-*d*<sub>6</sub>): δ = 0.83 (s, 6H, 2CH<sub>3</sub>), 1.98 (d, *J* = 9.25 Hz, 4H, 2CH<sub>2</sub>), 2.14 (s, 2H, CH<sub>2</sub>), 4.21 (t, *J* = 5.80 Hz, 2H, CH<sub>2</sub>),



7.28-7.31 (m, 2H, ArH), 7.51-7.53 (m, 2H, ArH), 7.89 (s, 1H, NH);  $^{13}\text{C}$  NMR (125 MHz, DMSO- $d_6$ ):  $\delta$  = 20.7, 28.4, 35.6, 38.1, 38.7, 42.6, 51.8, 103.7, 115.6, 115.7 (d,  $J$  = 21.3 Hz), 120.7, 130.4 (d,  $J$  = 8.8 Hz), 135.4, 138.6 (d,  $J$  = 2.5 Hz), 149.8, 163.7 (d,  $J$  = 246.3 Hz), 185.1, 189.2;  $^{19}\text{F}$  NMR (470 MHz, DMSO- $d_6$ ):  $\delta$  = -110.1. HRMS (TOF ES $^+$ ):  $m/z$  calcd for  $\text{C}_{20}\text{H}_{22}\text{O}_2\text{N}_2\text{F}$  [(M+H) $^+$ ], 341.1660; found, 341.1670.

### 10-nitro-1,2,3,4-tetrahydropyrimido[1,2-*a*]indol-9-ol (5a)

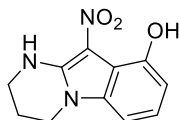

Yellow solid (42%, 97mg); Mp: 303.9–304.9 °C;  $^1\text{H}$  NMR (600 MHz, DMSO- $d_6$ ):  $\delta$  = 2.19-2.23 (m, 2H, CH $_2$ ), 3.62-3.64 (m, 2H, CH $_2$ ), 2.95 (t,  $J$  = 5.88 Hz, 2H, CH $_2$ ), 6.53 (d,  $J$  = 8.16 Hz, 1H, ArH), 6.60 (d,  $J$  = 7.86 Hz, 1H, ArH), 7.06 (t,  $J$  = 7.98 Hz, 1H, ArH), 9.15 (s, 1H, OH);  $^{13}\text{C}$  NMR (150 MHz, DMSO- $d_6$ ):  $\delta$  = 19.5, 38.6, 40.0, 100.2, 106.2, 110.7, 112.2, 126.7, 135.8, 148.8, 150.4. HRMS (TOF ES $^+$ ):  $m/z$  calcd for  $\text{C}_{11}\text{H}_{11}\text{O}_3\text{N}_3\text{Na}$  [(M+Na) $^+$ ], 256.0693; found, 256.0696.

### 7-methyl-10-nitro-1,2,3,4-tetrahydropyrimido[1,2-*a*]indol-9-ol (5b)

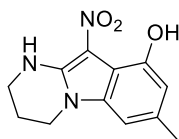

Yellow solid (30%, 74mg); Mp: 269.3–270.3 °C;  $^1\text{H}$  NMR (600 MHz, DMSO- $d_6$ ):  $\delta$  = 2.09 (t,  $J$  = 5.52 Hz, 2H, CH $_2$ ), 2.28 (s, 3H, CH $_3$ ), 3.51 (s, 2H, CH $_2$ ), 3.92 (t,  $J$  = 5.82 Hz, 2H, CH $_2$ ), 6.35 (s, 1H, ArH), 6.55 (s, 1H, ArH), 9.24 (s, 1H, NH), 11.22 (s, 1H, OH);  $^{13}\text{C}$  NMR (150 MHz, DMSO- $d_6$ ):  $\delta$  = 19.3, 21.8, 38.8, 40.0, 101.6, 103.7, 111.3, 136.4, 137.3, 149.0, 149.9. HRMS (TOF ES $^+$ ):  $m/z$  calcd for  $\text{C}_{12}\text{H}_{14}\text{O}_3\text{N}_3$  [(M+H) $^+$ ], 248.1030; found, 248.1028.

### 10-nitro-7-phenyl-1,2,3,4-tetrahydropyrimido[1,2-*a*]indol-9-ol (5c)

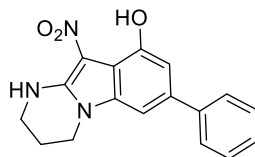

Yellow solid (35%, 108mg); Mp: 268.4–269.4 °C;  $^1\text{H}$  NMR (500 MHz, DMSO- $d_6$ ):  $\delta$  = 2.13 (d,  $J$  = 5.55 Hz, 2H, CH $_2$ ), 3.54 (s, 2H, CH $_2$ ), 4.02 (t,  $J$  = 5.80 Hz, 2H, CH $_2$ ), 6.83 (d,  $J$  = 1.30 Hz, 1H, ArH), 7.07 (d,  $J$  = 1.25 Hz, 1H, ArH), 7.37 (d,  $J$  = 7.35 Hz, 1H, ArH), 7.45 (t,  $J$  = 7.45 Hz, 2H, ArH), 7.71 (t,  $J$  = 7.25 Hz, 2H, ArH), 9.32 (s, 1H, NH), 11.3 (s, 1H, OH);  $^{13}\text{C}$  NMR (125 MHz, DMSO- $d_6$ ):  $\delta$  = 19.3, 38.9, 40.0, 99.7, 105.4, 108.8, 112.0, 127.1, 128.0, 129.3, 136.9,

139.5, 140.3, 149.2, 150.3. HRMS (TOF ES<sup>+</sup>):  $m/z$  calcd for C<sub>17</sub>H<sub>15</sub>O<sub>3</sub>N<sub>3</sub>Na [(M+Na)<sup>+</sup>], 332.1006; found, 332.1003.

**7-isopropyl-10-nitro-1,2,3,4-tetrahydropyrimido[1,2-*a*]indol-9-ol (5d)**

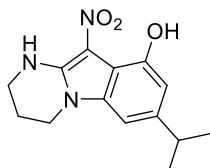

Yellow solid (20%, 55mg); Mp: 239.3–240.3 °C; <sup>1</sup>H NMR (500 MHz, DMSO-*d*<sub>6</sub>):  $\delta$  = 1.21 (d,  $J$  = 6.90 Hz, 6H, 2CH<sub>3</sub>), 2.13 (s, 2H, CH<sub>2</sub>), 2.83-2.88 (m, 1H, CH), 3.56 (s, 2H, CH<sub>2</sub>), 3.93 (t,  $J$  = 5.70 Hz, 2H, CH<sub>2</sub>), 6.39 (s, 1H, ArH), 6.55 (s, 1H, ArH), 9.21 (s, 1H, NH), 11.16 (s, 1H, OH); <sup>13</sup>C NMR (125 MHz, DMSO-*d*<sub>6</sub>):  $\delta$  = 19.4, 24.3, 34.2, 38.7, 40.0, 98.7, 104.1, 108.8, 112.0, 148.6, 149.0, 150.0. HRMS (TOF ES<sup>+</sup>):  $m/z$  calcd for C<sub>14</sub>H<sub>18</sub>O<sub>3</sub>N<sub>3</sub> [(M+H)<sup>+</sup>], 276.1343; found, 276.1342.

## 4 X-ray Structure and Data<sup>3</sup>

### 4.1 X-ray Structure and Data of 3d

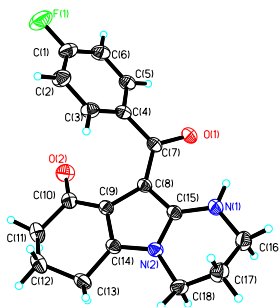

Figure S1. X-Ray crystal structure of 3d

Table S1. Crystal data and structure refinement for 3d

|                                   |                                                                                                                                   |
|-----------------------------------|-----------------------------------------------------------------------------------------------------------------------------------|
| Identification code               | mo-240227B                                                                                                                        |
| Empirical formula                 | C <sub>18</sub> H <sub>17</sub> FN <sub>2</sub> O <sub>2</sub>                                                                    |
| Formula weight                    | 312.33 g/mol                                                                                                                      |
| Wavelength                        | 0.71073 Å                                                                                                                         |
| Crystal system, space group       | Triclinic, P -1                                                                                                                   |
| Unit cell dimensions              | a = 8.5103(2) Å    α = 86.6800(10)°.<br>b = 10.3560(3) Å    β = 88.9640(10)°.<br>c = 17.9206(4) Å    γ = 75.0740(10)°.            |
| Volume                            | 1523.53(7) Å <sup>3</sup>                                                                                                         |
| Z, Calculated density             | 4, 1.362 g/cm <sup>3</sup>                                                                                                        |
| Absorption coefficient            | 0.098 mm <sup>-1</sup>                                                                                                            |
| F(000)                            | 656                                                                                                                               |
| Crystal size                      | 0.220 x 0.240 x 0.260 mm                                                                                                          |
| Theta range for data collection   | 2.04 to 28.38°                                                                                                                    |
| Limiting indices                  | -11 ≤ h ≤ 11, -13 ≤ k ≤ 13, -23 ≤ l ≤ 23                                                                                          |
| Reflections collected             | 55404                                                                                                                             |
| Independent reflections           | 7604 [R(int) = 0.0609]                                                                                                            |
| Max. and min. transmission        | 0.7457 and 0.7263                                                                                                                 |
| Structure solution technique      | direct methods                                                                                                                    |
| Structure solution program        | SHELXT 2018/2 (Sheldrick, 2018)                                                                                                   |
| Refinement method                 | Full-matrix least-squares on F <sup>2</sup>                                                                                       |
| Refinement program                | SHELXL 2018/3 (Sheldrick, 2015)                                                                                                   |
| Function minimized                | Σw(Fo <sup>2</sup> - Fc <sup>2</sup> ) <sup>2</sup>                                                                               |
| Data / restraints / parameters    | 7604 / 0 / 415                                                                                                                    |
| Goodness-of-fit on F <sup>2</sup> | 1.085                                                                                                                             |
| Final R indices [I > 2σ(I)]       | R1 = 0.0622, wR2 = 0.1143                                                                                                         |
| R indices (all data)              | R1 = 0.0994, wR2 = 0.1314                                                                                                         |
| Weighting scheme                  | w = 1/[σ <sup>2</sup> (Fo <sup>2</sup> ) + (0.0324P) <sup>2</sup> + 0.8106P]<br>where P = (Fo <sup>2</sup> + 2Fc <sup>2</sup> )/3 |
| Largest diff. peak and hole       | 0.194 and -0.191 eÅ <sup>-3</sup>                                                                                                 |
| R.M.S. deviation from mean        | 0.039 eÅ <sup>-3</sup>                                                                                                            |

**Table S2.** Bond lengths (Å) for **3d**

---

|          |          |          |          |
|----------|----------|----------|----------|
| O4-C25   | 1.250(2) | O1-C7    | 1.247(2) |
| O2-C10   | 1.224(2) | N2-C14   | 1.377(3) |
| N2-C15   | 1.373(2) | N2-C18   | 1.466(2) |
| F2-C19   | 1.367(2) | O3-C33   | 1.226(3) |
| F1-C1    | 1.363(3) | N4-C27   | 1.375(2) |
| N4-C31   | 1.373(2) | N4-C30   | 1.464(2) |
| N3-H3    | 0.860000 | N3-C27   | 1.340(2) |
| N3-C28   | 1.452(2) | N1-H1    | 0.860000 |
| N1-C15   | 1.340(2) | N1-C16   | 1.453(3) |
| C26-C27  | 1.401(3) | C26-C25  | 1.434(3) |
| C26-C32  | 1.455(3) | C9-C14   | 1.369(3) |
| C9-C8    | 1.456(3) | C9-C10   | 1.452(3) |
| C14-C13  | 1.488(3) | C4-C7    | 1.495(3) |
| C4-C5    | 1.387(3) | C4-C3    | 1.388(3) |
| C22-C25  | 1.497(3) | C22-C21  | 1.387(3) |
| C22-C23  | 1.388(3) | C8-C15   | 1.403(3) |
| C8-C7    | 1.430(3) | C10-C11  | 1.511(3) |
| C32-C33  | 1.451(3) | C32-C31  | 1.370(3) |
| C5-H5    | 0.930000 | C5-C6    | 1.377(3) |
| C21-H21  | 0.930000 | C21-C20  | 1.385(3) |
| C33-C34  | 1.516(3) | C31-C36  | 1.489(3) |
| C3-H3A   | 0.930000 | C3-C2    | 1.384(3) |
| C23-H23  | 0.930000 | C23-C24  | 1.384(3) |
| C13-H13A | 0.970000 | C13-H13B | 0.970000 |
| C13-C12  | 1.519(3) | C30-H30A | 0.970000 |
| C30-H30B | 0.970000 | C30-C29  | 1.510(3) |
| C29-H29A | 0.970000 | C29-H29B | 0.970000 |
| C29-C28  | 1.511(3) | C18-H18A | 0.970000 |
| C18-H18B | 0.970000 | C18-C17  | 1.509(3) |
| C20-H20  | 0.930000 | C20-C19  | 1.363(3) |
| C28-H28A | 0.970000 | C28-H28B | 0.970000 |
| C2-H2    | 0.930000 | C2-C1    | 1.368(3) |
| C6-H6    | 0.930000 | C6-C1    | 1.371(3) |
| C16-H16A | 0.970000 | C16-H16B | 0.970000 |
| C16-C17  | 1.514(3) | C36-H36A | 0.970000 |
| C36-H36B | 0.970000 | C36-C35  | 1.524(3) |
| C17-H17A | 0.970000 | C17-H17B | 0.970000 |
| C19-C24  | 1.363(3) | C12-H12A | 0.970000 |
| C12-H12B | 0.970000 | C12-C11  | 1.511(3) |
| C24-H24  | 0.930000 | C34-H34A | 0.970000 |
| C34-H34B | 0.970000 | C34-C35  | 1.512(4) |
| C11-H11A | 0.970000 | C11-H11B | 0.970000 |
| C35-H35A | 0.970000 | C35-H35B | 0.970000 |

---

## 4.2 X-ray Structure and Data of 4h

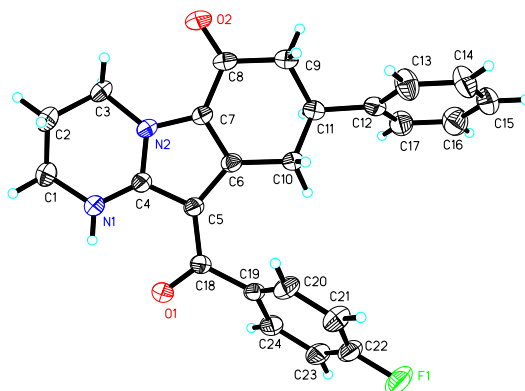

**Figure S2.** X-Ray crystal structure of **4h**

**Table S3.** Crystal data and structure refinement for **4h**

|                                   |                                                                                                                                   |
|-----------------------------------|-----------------------------------------------------------------------------------------------------------------------------------|
| Identification code               | mo-240227A                                                                                                                        |
| Empirical formula                 | C <sub>24</sub> H <sub>21</sub> FN <sub>2</sub> O <sub>2</sub>                                                                    |
| Formula weight                    | 388.43 g/mol                                                                                                                      |
| Wavelength                        | 0.71073 Å                                                                                                                         |
| Crystal system, space group       | monoclinic, P 1 21/n 1                                                                                                            |
| Unit cell dimensions              | a = 14.4294(6) Å    α = 90°.<br>b = 18.3423(10) Å    β = 0.1700(10)°.<br>c = 14.5578(6) Å    γ = 90°.                             |
| Volume                            | 3853.0(3) Å <sup>3</sup>                                                                                                          |
| Z, Calculated density             | 1.339 g/cm <sup>3</sup>                                                                                                           |
| Absorption coefficient            | 0.092 mm <sup>-1</sup>                                                                                                            |
| F(000)                            | 1632                                                                                                                              |
| Crystal size                      | 0.200 x 0.240 x 0.260 mm                                                                                                          |
| Theta range for data collection   | 2.22 to 28.40°                                                                                                                    |
| Limiting indices                  | -19 ≤ h ≤ 18, -24 ≤ k ≤ 24, -19 ≤ l ≤ 19                                                                                          |
| Reflections collected             | 85595                                                                                                                             |
| Independent reflections           | 9588 [R(int) = 0.1034]                                                                                                            |
| Max. and min. transmission        | 0.7457 and 0.7124                                                                                                                 |
| Structure solution technique      | direct methods                                                                                                                    |
| Structure solution program        | SHELXT 2018/2 (Sheldrick, 2018)                                                                                                   |
| Refinement method                 | Full-matrix least-squares on F <sup>2</sup>                                                                                       |
| Refinement program                | SHELXL 2018/3 (Sheldrick, 2015)                                                                                                   |
| Function minimized                | Σw(Fo <sup>2</sup> - Fc <sup>2</sup> ) <sup>2</sup>                                                                               |
| Data / restraints / parameters    | 9588 / 50 / 521                                                                                                                   |
| Goodness-of-fit on F <sup>2</sup> | 1.082                                                                                                                             |
| Final R indices [I > 2σ(I)]       | R1 = 0.0845, wR2 = 0.1539                                                                                                         |
| R indices (all data)              | R1 = 0.1521, wR2 = 0.1864                                                                                                         |
| Weighting scheme                  | w = 1/[σ <sup>2</sup> (Fo <sup>2</sup> ) + (0.0462P) <sup>2</sup> + 3.1389P]<br>where P = (Fo <sup>2</sup> + 2Fc <sup>2</sup> )/3 |
| Largest diff. peak and hole       | 0.413 and -0.356 eÅ <sup>-3</sup>                                                                                                 |
| R.M.S. deviation from mean        | 0.044 eÅ <sup>-3</sup>                                                                                                            |

**Table S4.** Bond lengths (Å) for **4h**.

---

|          |           |          |          |
|----------|-----------|----------|----------|
| F1-C22   | 1.362(3)  | O1-C18   | 1.237(3) |
| O2-C8    | 1.225(3)  | N1-H1    | 0.860000 |
| N1-C1    | 1.456(4)  | N1-C4    | 1.325(3) |
| N2-C3    | 1.467(3)  | N2-C4    | 1.346(3) |
| N2-C7    | 1.405(3)  | C1-H1A   | 0.970000 |
| C1-H1B   | 0.970000  | C1-C2    | 1.503(5) |
| C2-H2A   | 0.970000  | C2-H2B   | 0.970000 |
| C2-C3    | 1.503(4)  | C3-H3A   | 0.970000 |
| C3-H3B   | 0.970000  | C4-C5    | 1.434(4) |
| C5-C6    | 1.429(4)  | C5-C18   | 1.439(3) |
| C6-C7    | 1.376(3)  | C6-C10   | 1.501(4) |
| C7-C8    | 1.441(4)  | C8-C9    | 1.503(4) |
| C9-H9A   | 0.970000  | C9-H9B   | 0.970000 |
| C9-C11   | 1.522(4)  | C10-H10A | 0.970000 |
| C10-H10B | 0.970000  | C10-C11  | 1.533(4) |
| C11-H11  | 0.980000  | C11-C12  | 1.513(4) |
| C12-C13  | 1.376(4)  | C12-C17  | 1.377(4) |
| C13-H13  | 0.930000  | C13-C14  | 1.387(4) |
| C14-H14  | 0.930000  | C14-C15  | 1.357(5) |
| C15-H15  | 0.930000  | C15-C16  | 1.361(5) |
| C16-H16  | 0.930000  | C16-C17  | 1.380(5) |
| C17-H17  | 0.930000  | C18-C19  | 1.494(4) |
| C19-C20  | 1.382(4)  | C19-C24  | 1.389(4) |
| C20-H20  | 0.930000  | C20-C21  | 1.384(4) |
| C21-H21  | 0.930000  | C21-C22  | 1.368(4) |
| C22-C23  | 1.359(5)  | C23-H23  | 0.930000 |
| C23-C24  | 1.376(4)  | C24-H24  | 0.930000 |
| F2-C45   | 1.360(3)  | O3-C32   | 1.229(3) |
| O4-C48   | 1.238(3)  | N3-C25   | 1.467(3) |
| N3-C28   | 1.352(3)  | N3-C31   | 1.402(3) |
| N4-H4    | 0.860000  | N4-C27   | 1.449(4) |
| N4-C28   | 1.330(3)  | C25-H25A | 0.970000 |
| C25-H25B | 0.970000  | C25-H25C | 0.970000 |
| C25-H25D | 0.970000  | C25-C26  | 1.456(6) |
| C25-C26A | 1.581(11) | C26-H26A | 0.970000 |
| C26-H26B | 0.970000  | C26-C27  | 1.476(6) |
| C27-H27A | 0.970000  | C27-H27B | 0.970000 |
| C27-H27C | 0.970000  | C27-H27D | 0.970000 |
| C27-C26A | 1.346(11) | C28-C29  | 1.425(3) |
| C29-C30  | 1.424(4)  | C29-C48  | 1.436(4) |
| C30-C3   | 1.371(3)  | C30-C35  | 1.500(4) |
| C31-C32  | 1.439(4)  | C32-C33  | 1.501(4) |
| C33-H33A | 0.970000  | C33-H33B | 0.970000 |

|           |          |           |          |
|-----------|----------|-----------|----------|
| C33-C34   | 1.502(4) | C34-H34   | 0.980000 |
| C34-C35   | 1.503(4) | C34-C36   | 1.513(3) |
| C35-H35A  | 0.970000 | C35-H35B  | 0.970000 |
| C36-C37   | 1.390000 | C36-C41   | 1.390000 |
| C37-H37   | 0.930000 | C37-C38   | 1.390000 |
| C38-H38   | 0.930000 | C38-C39   | 1.390000 |
| C39-H39   | 0.930000 | C39-C40   | 1.390000 |
| C40-H40   | 0.930000 | C40-C41   | 1.390000 |
| C41-H41   | 0.930000 | C42-C43   | 1.389(4) |
| C42-C47   | 1.377(4) | C42-C48   | 1.493(4) |
| C43-H43   | 0.930000 | C43-C44   | 1.384(4) |
| C44-H44   | 0.930000 | C44-C45   | 1.359(5) |
| C45-C46   | 1.354(4) | C46-H46   | 0.930000 |
| C46-C47   | 1.380(4) | C47-H47   | 0.930000 |
| C26A-H26C | 0.970000 | C26A-H26D | 0.970000 |

---

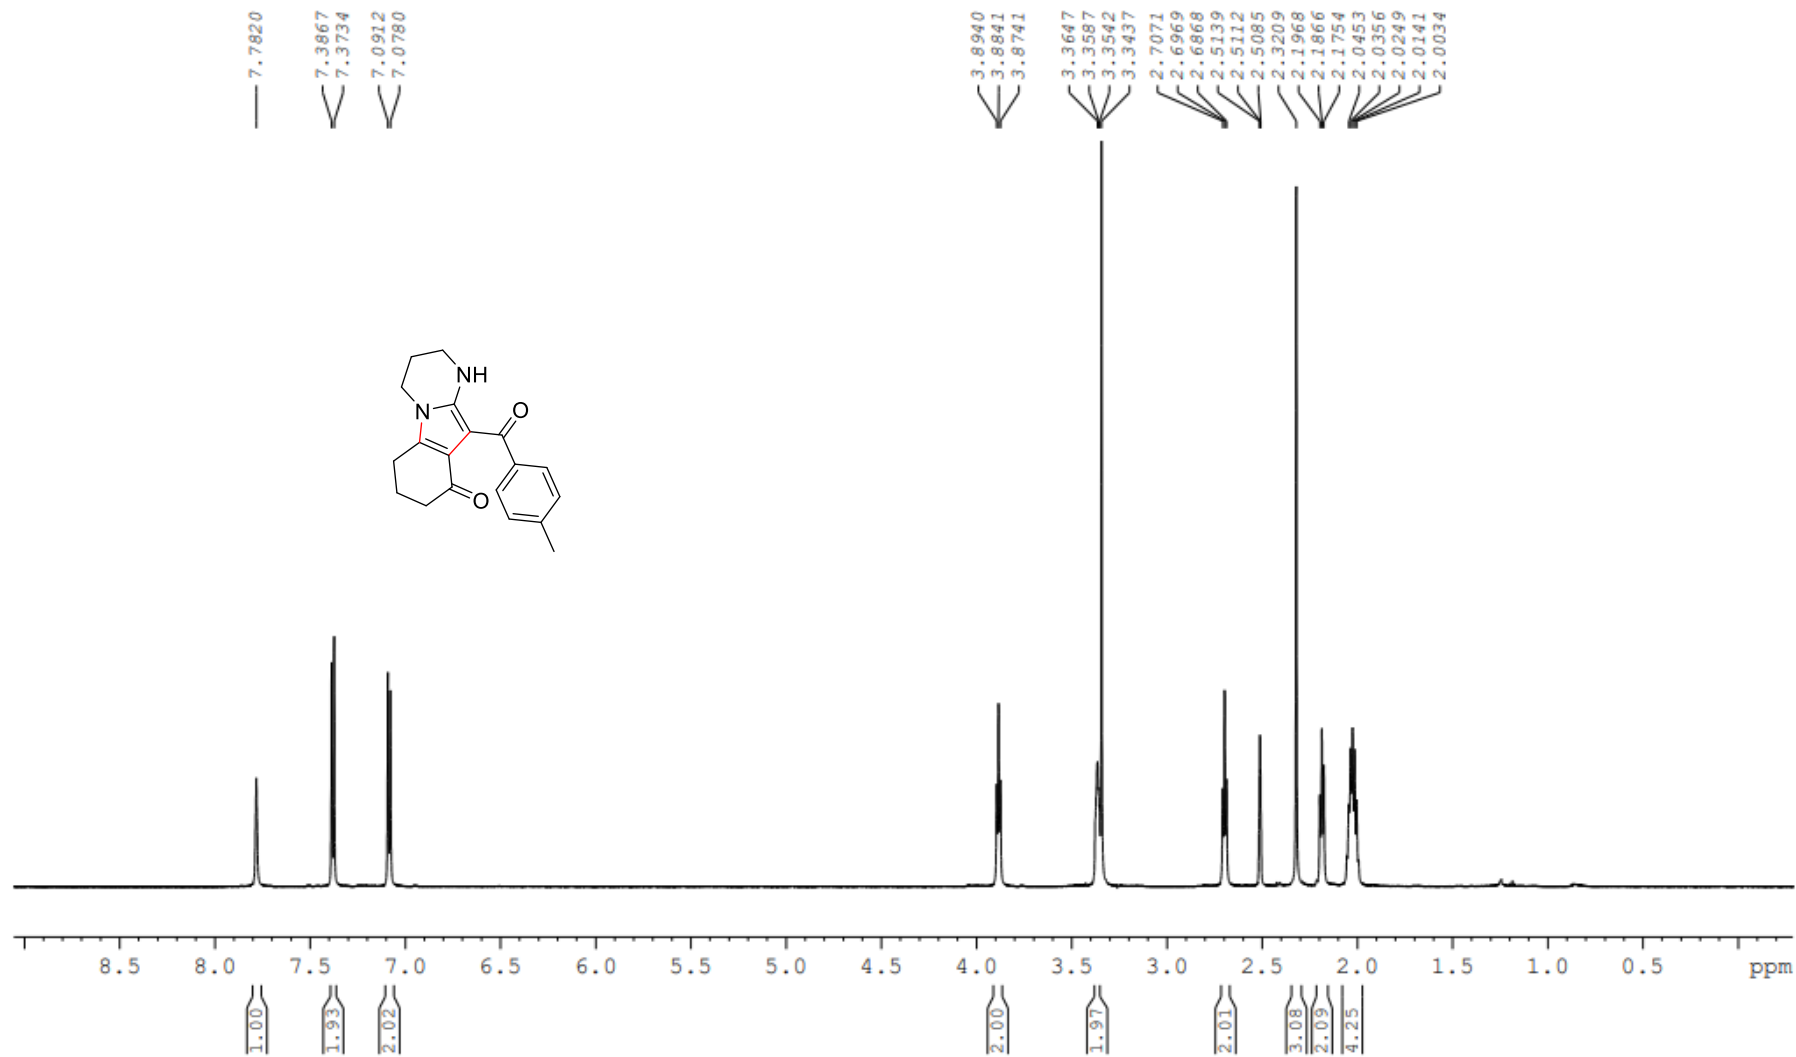

**Figure S3.**  $^1\text{H NMR}$  (600 MHz,  $\text{DMSO-}d_6$ ) spectra of compound **3a**



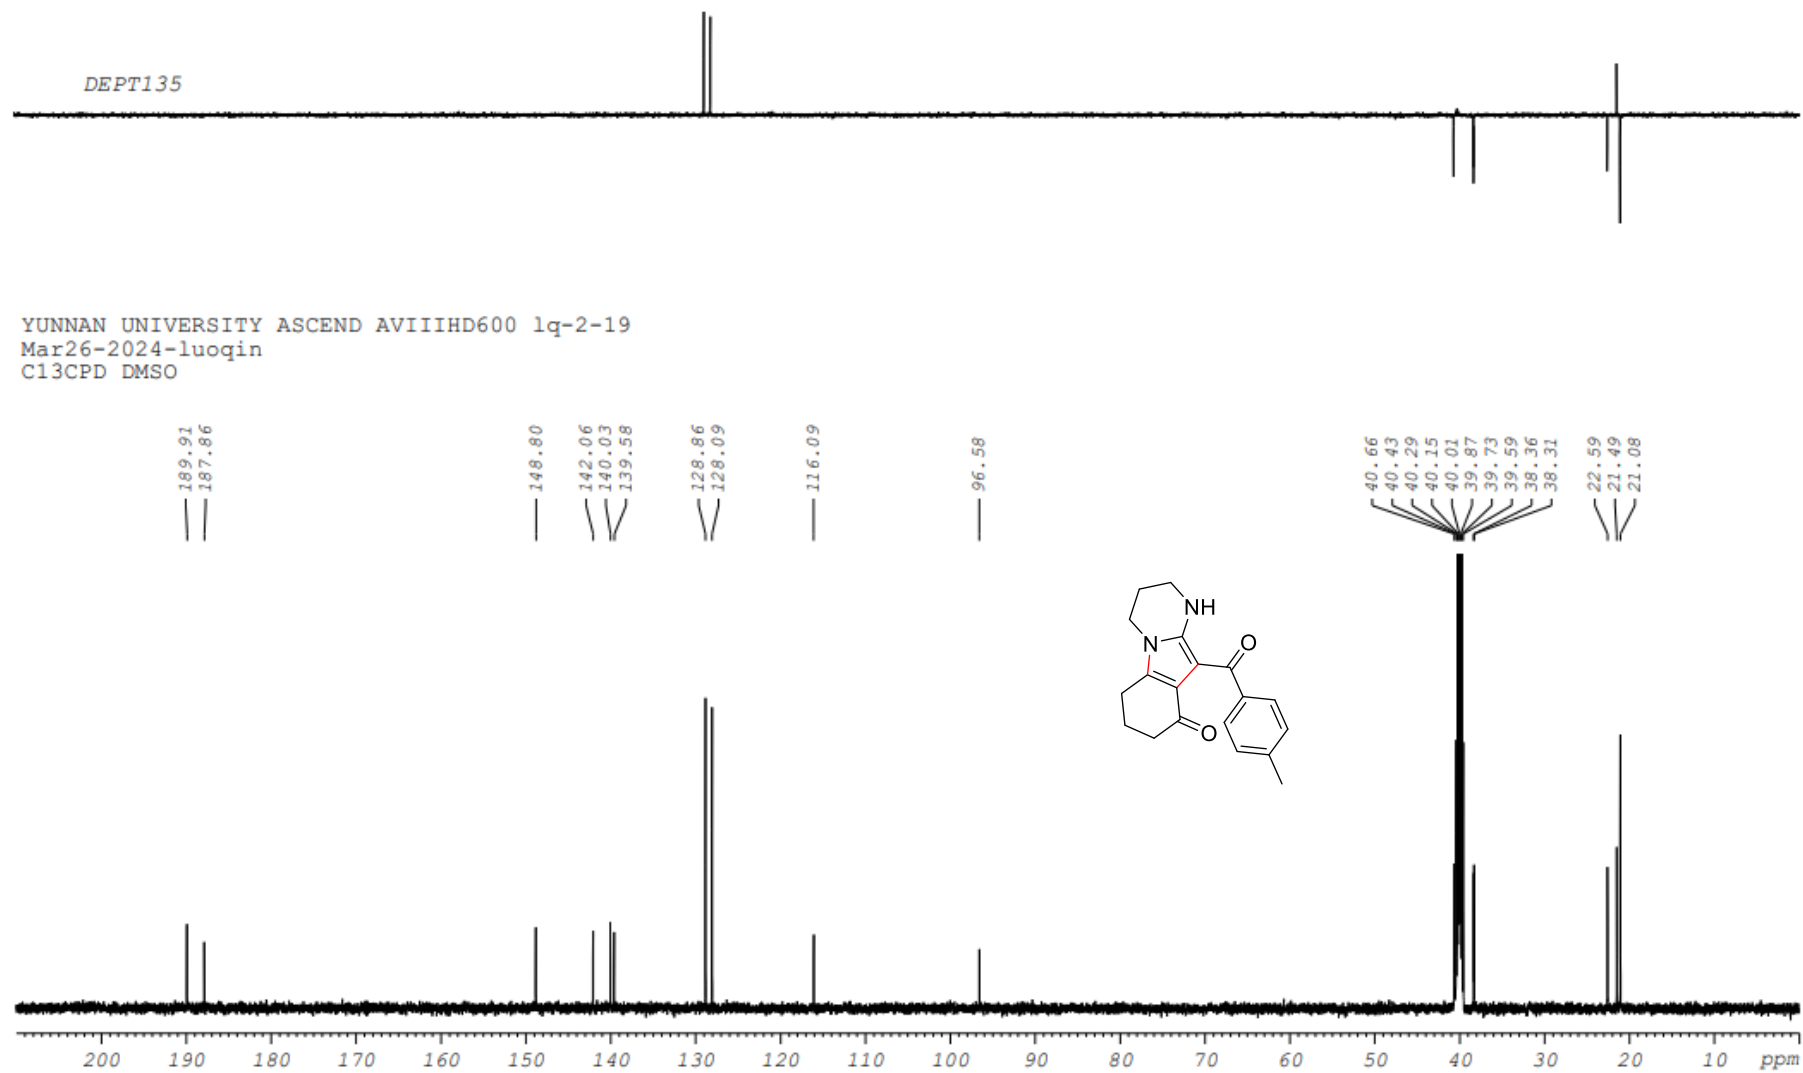

Figure S4.  $^{13}\text{C}$  NMR (150 MHz,  $\text{DMSO-}d_6$ ) spectra of compound **3a**

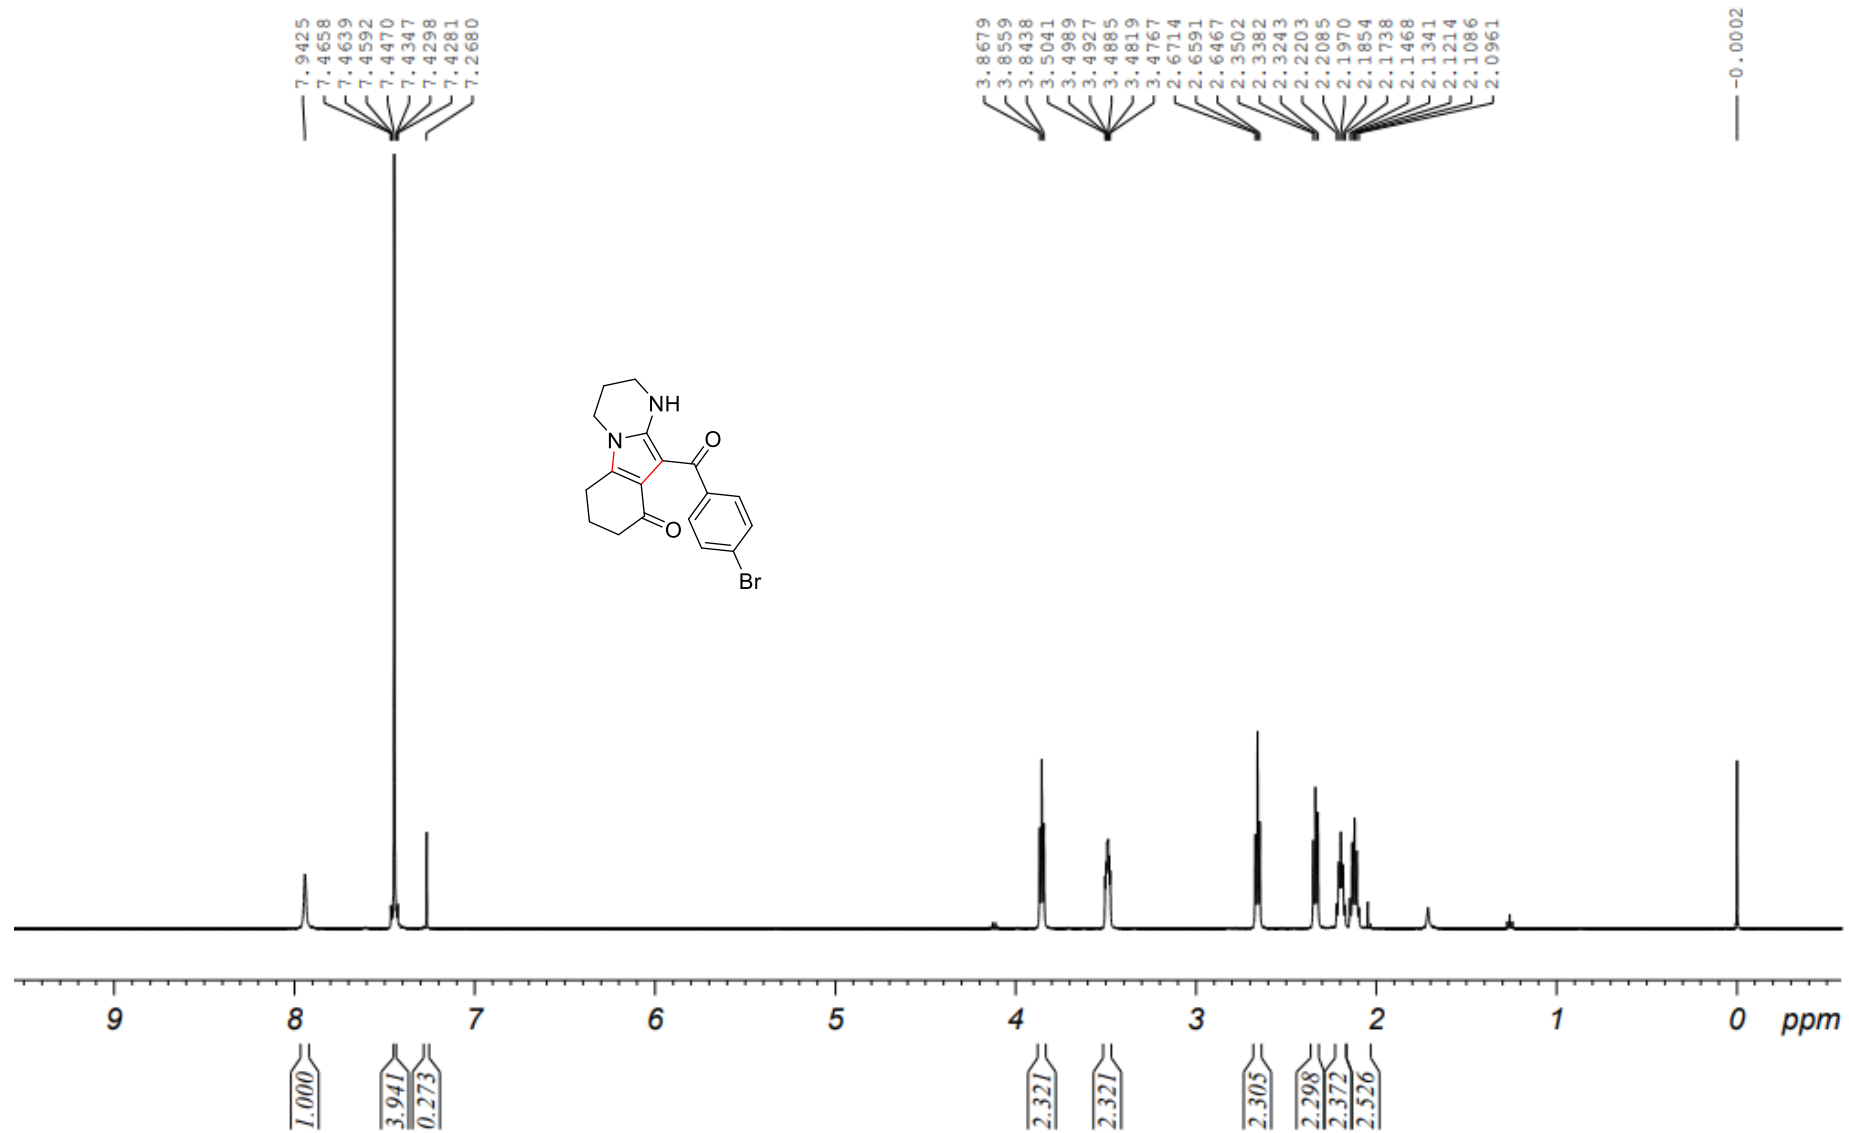

**Figure S5.**  $^1\text{H NMR}$  (500 MHz,  $\text{CDCl}_3-d_6$ ) spectra of compound **3b**

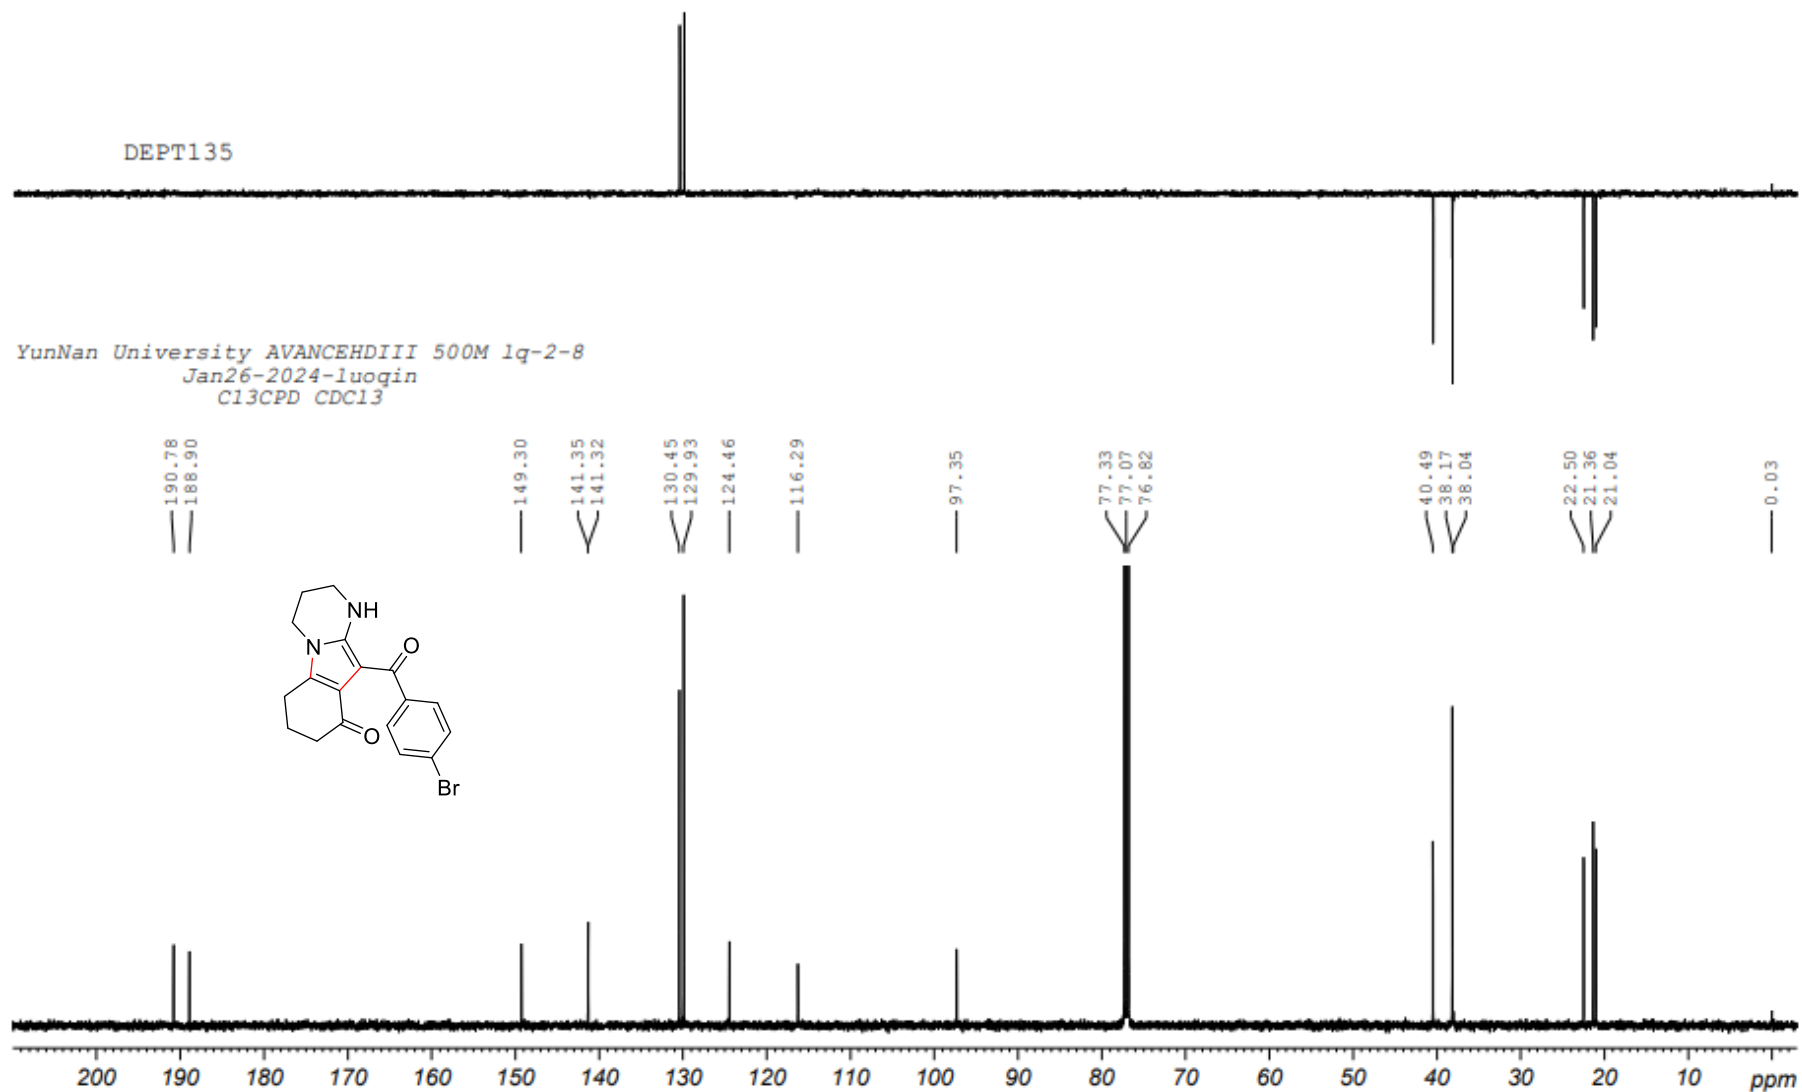

Figure S6.  $^{13}\text{C}$  NMR (125 MHz,  $\text{CDCl}_3-d_6$ ) spectra of compound **3b**

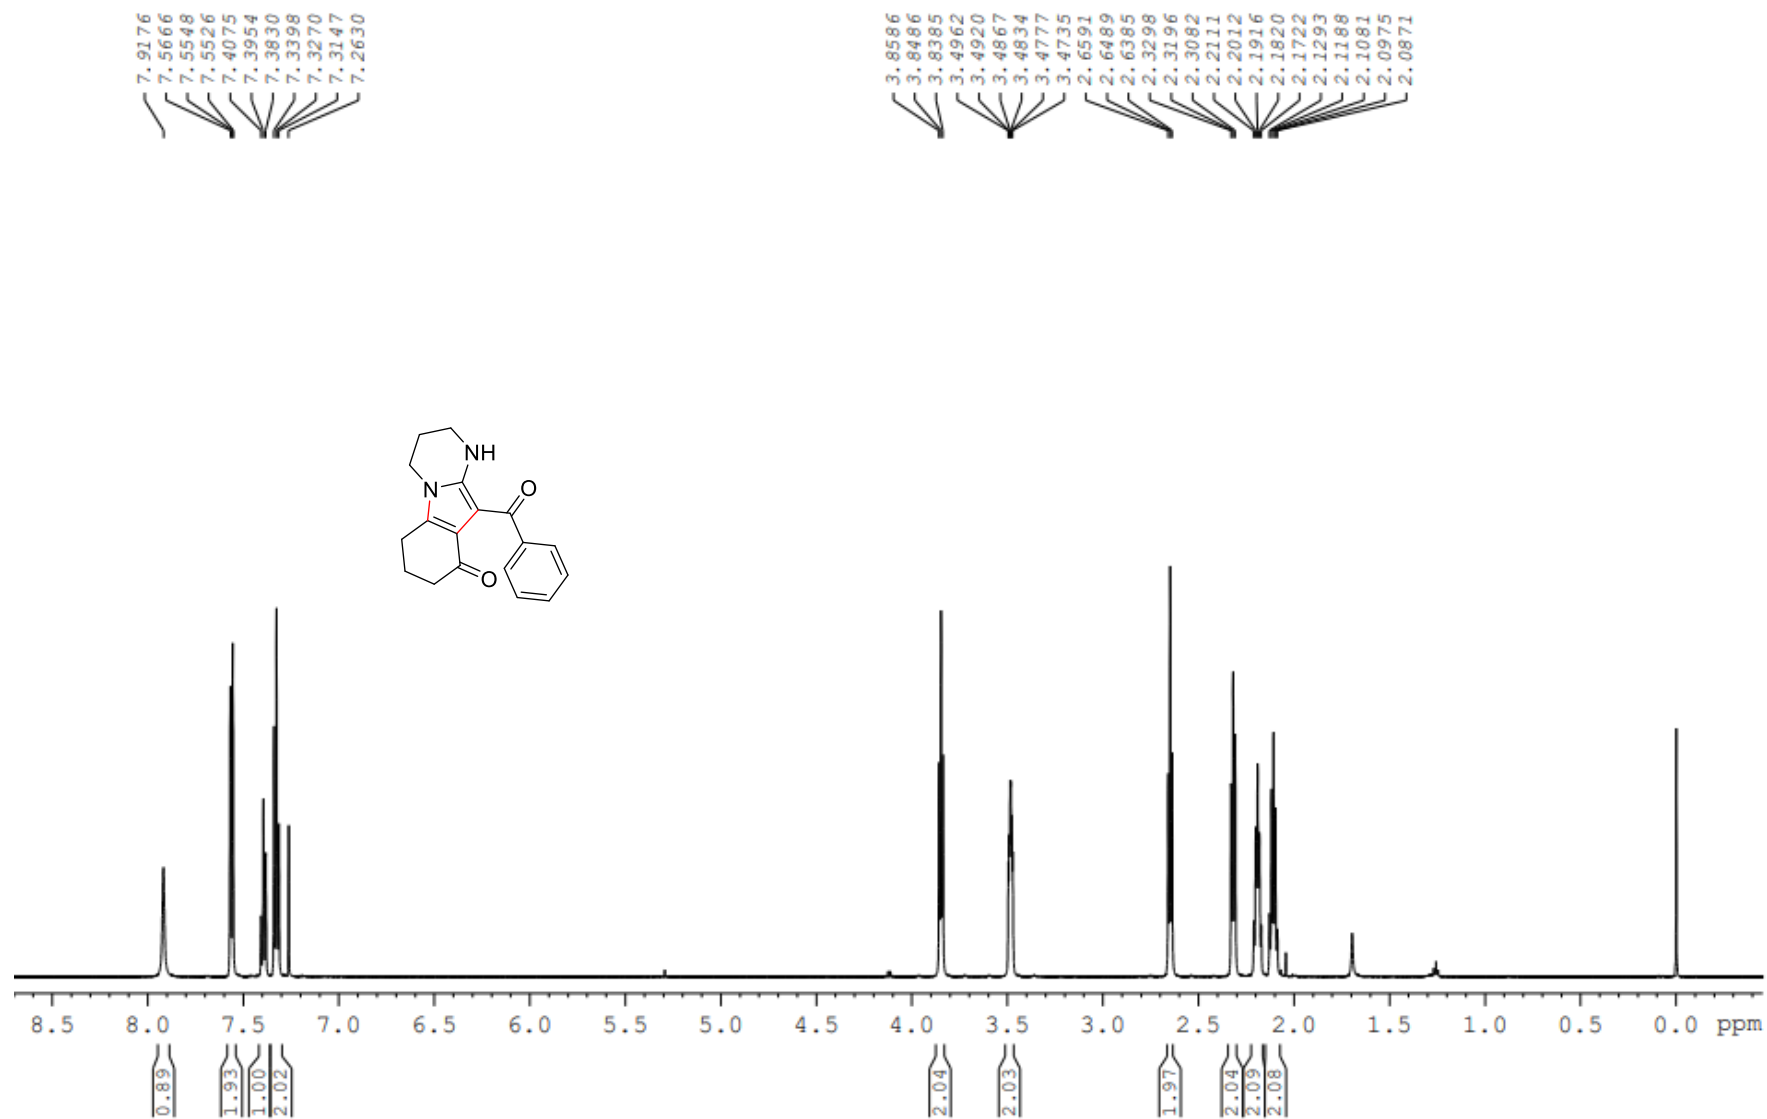

**Figure S7.** <sup>1</sup>H NMR (600 MHz, CDCl<sub>3</sub>-d<sub>6</sub>) spectra of compound **3c**

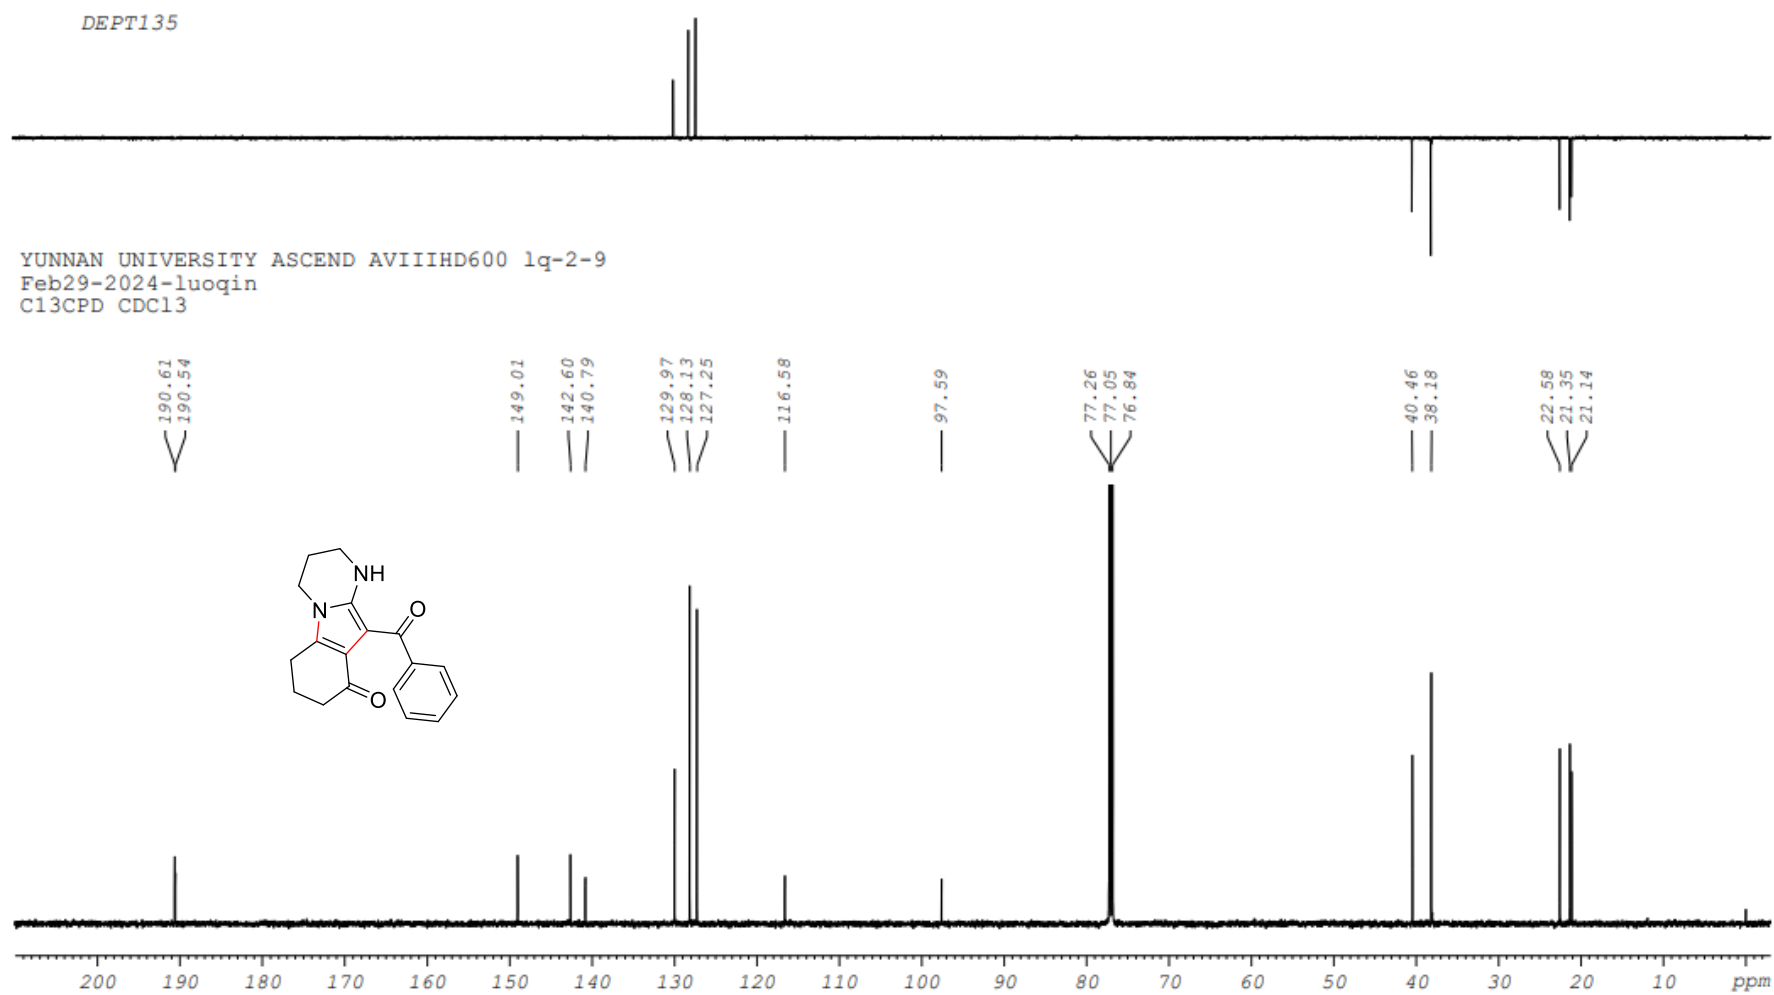

Figure S8.  $^{13}\text{C}$  NMR (150 MHz,  $\text{CDCl}_3-d_6$ ) spectra of compound 3c

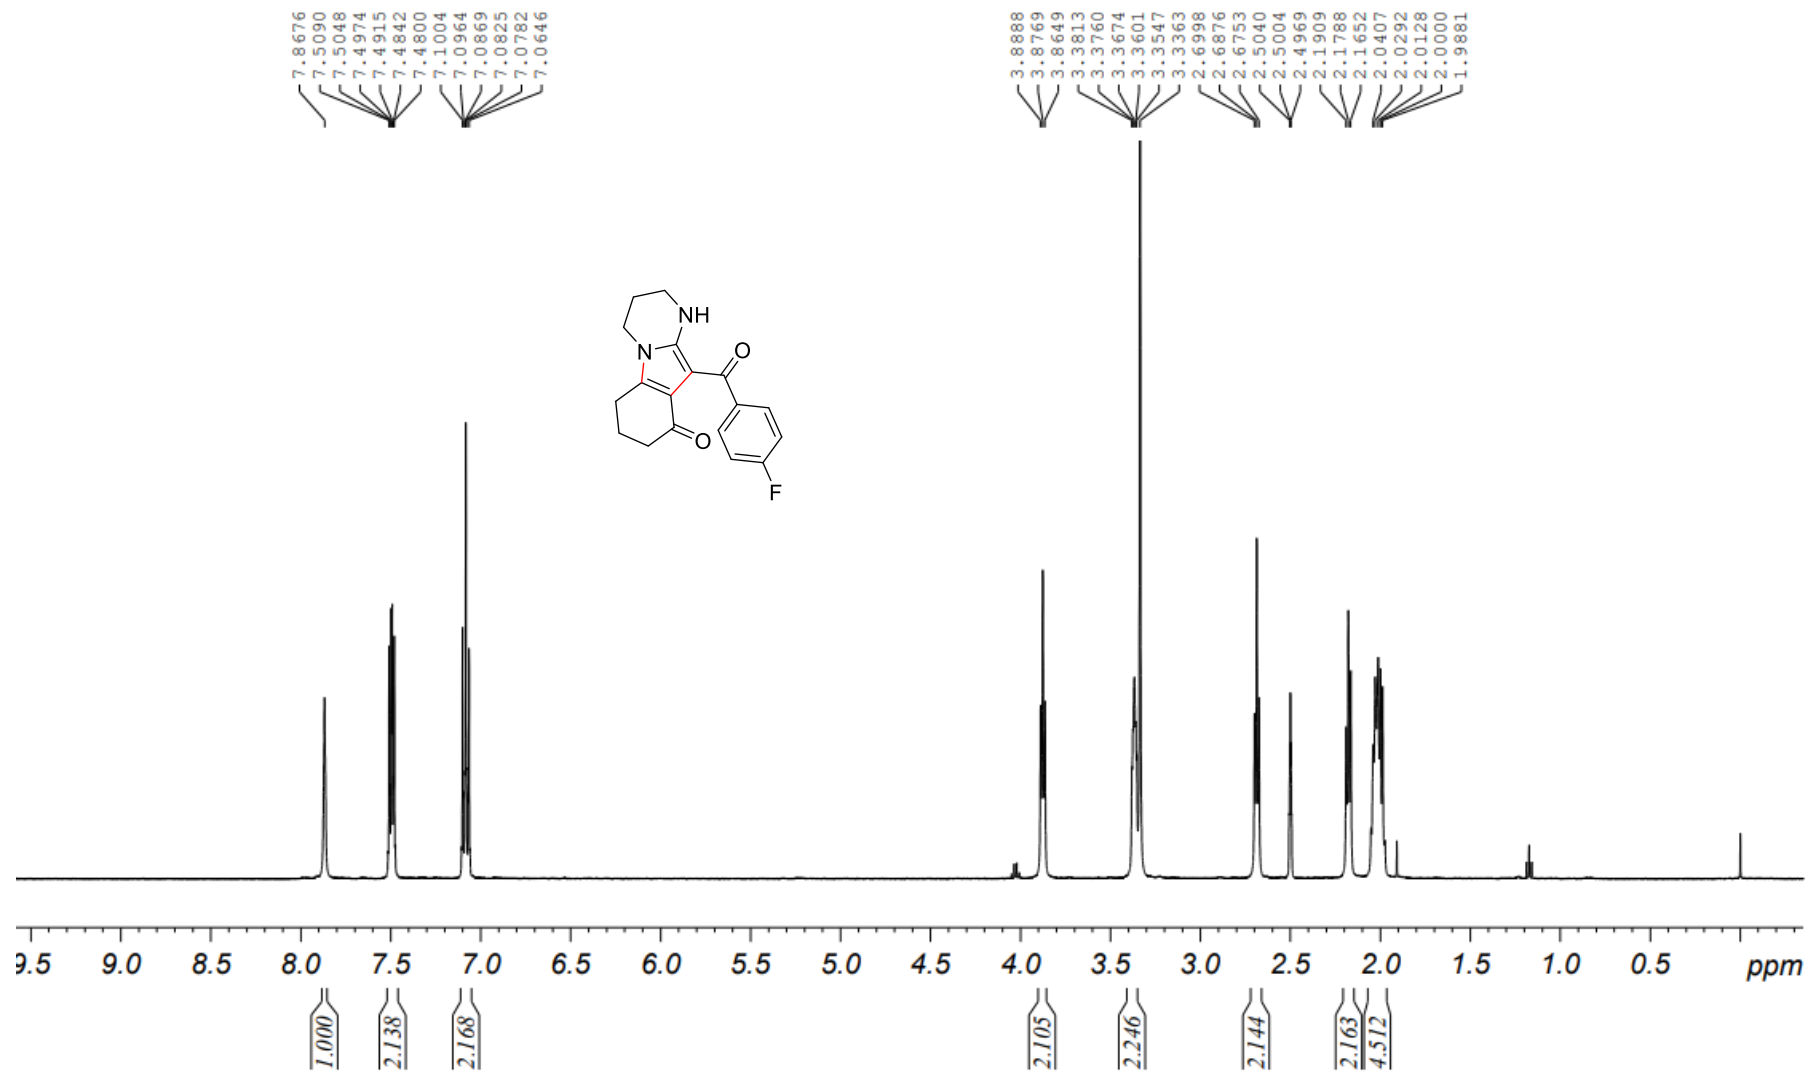

**Figure S9.**  $^1\text{H NMR}$  (500 MHz,  $\text{DMSO-}d_6$ ) spectra of compound **3d**

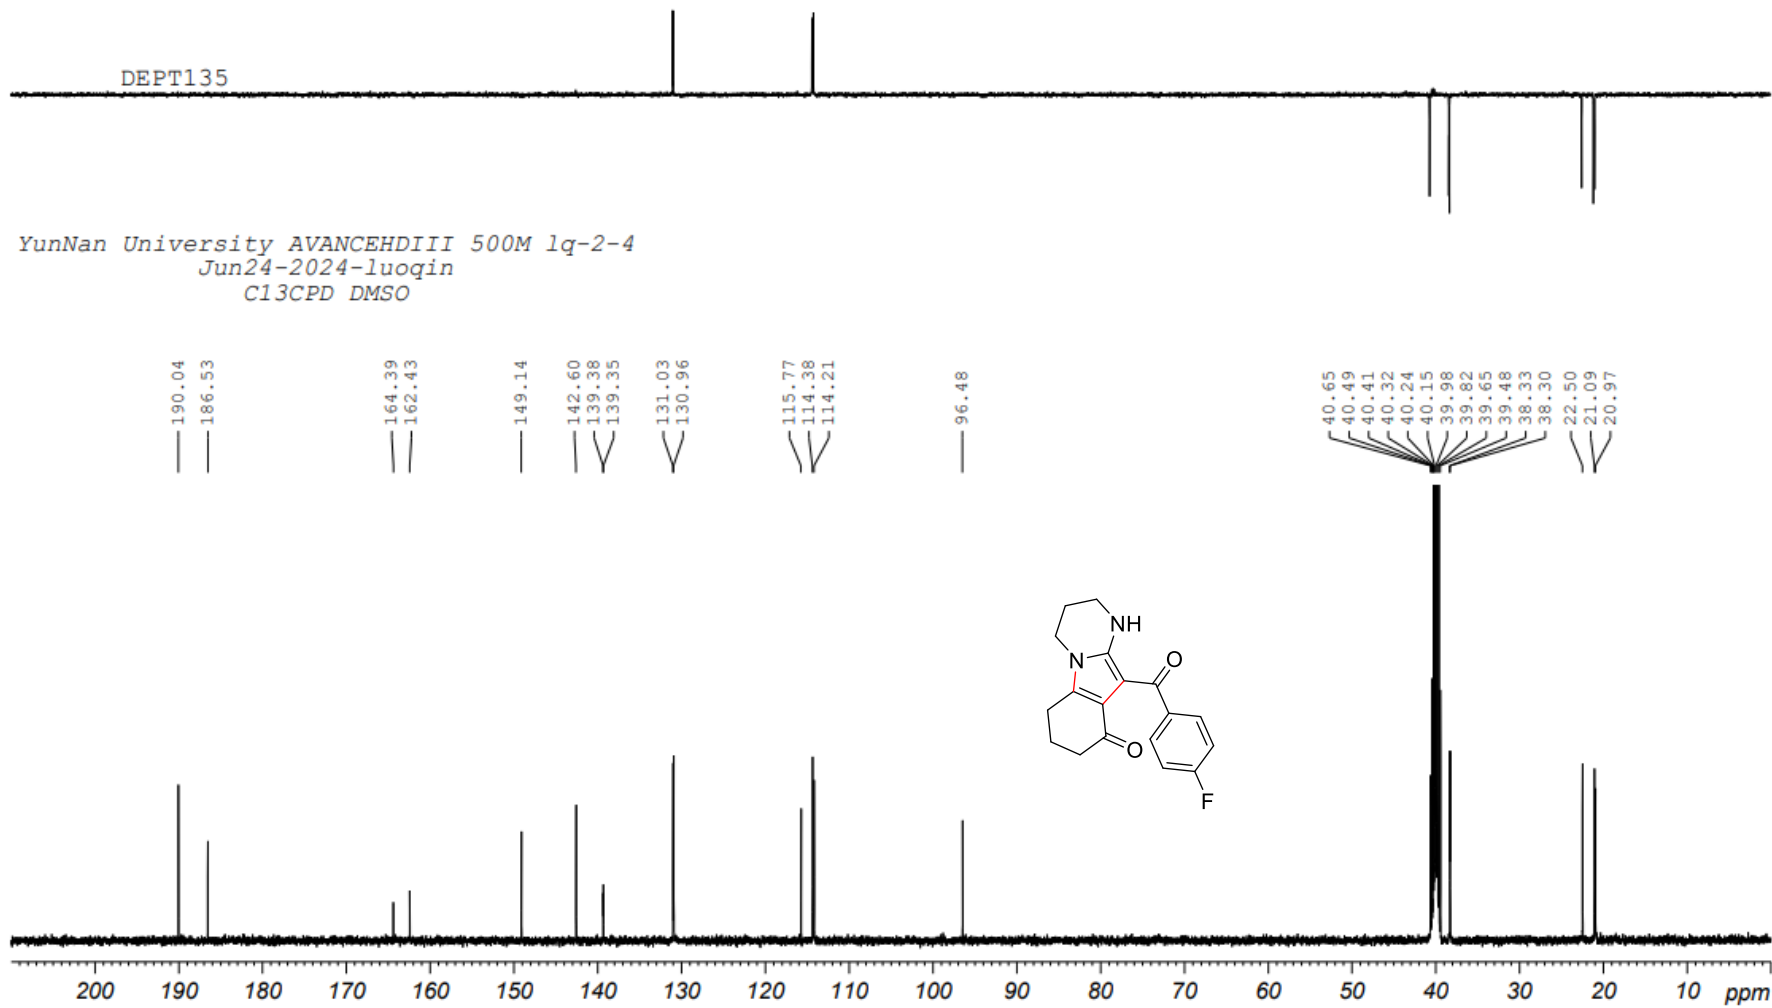

Figure S10.  $^{13}\text{C}$  NMR (125 MHz,  $\text{DMSO-}d_6$ ) spectra of compound **3d**

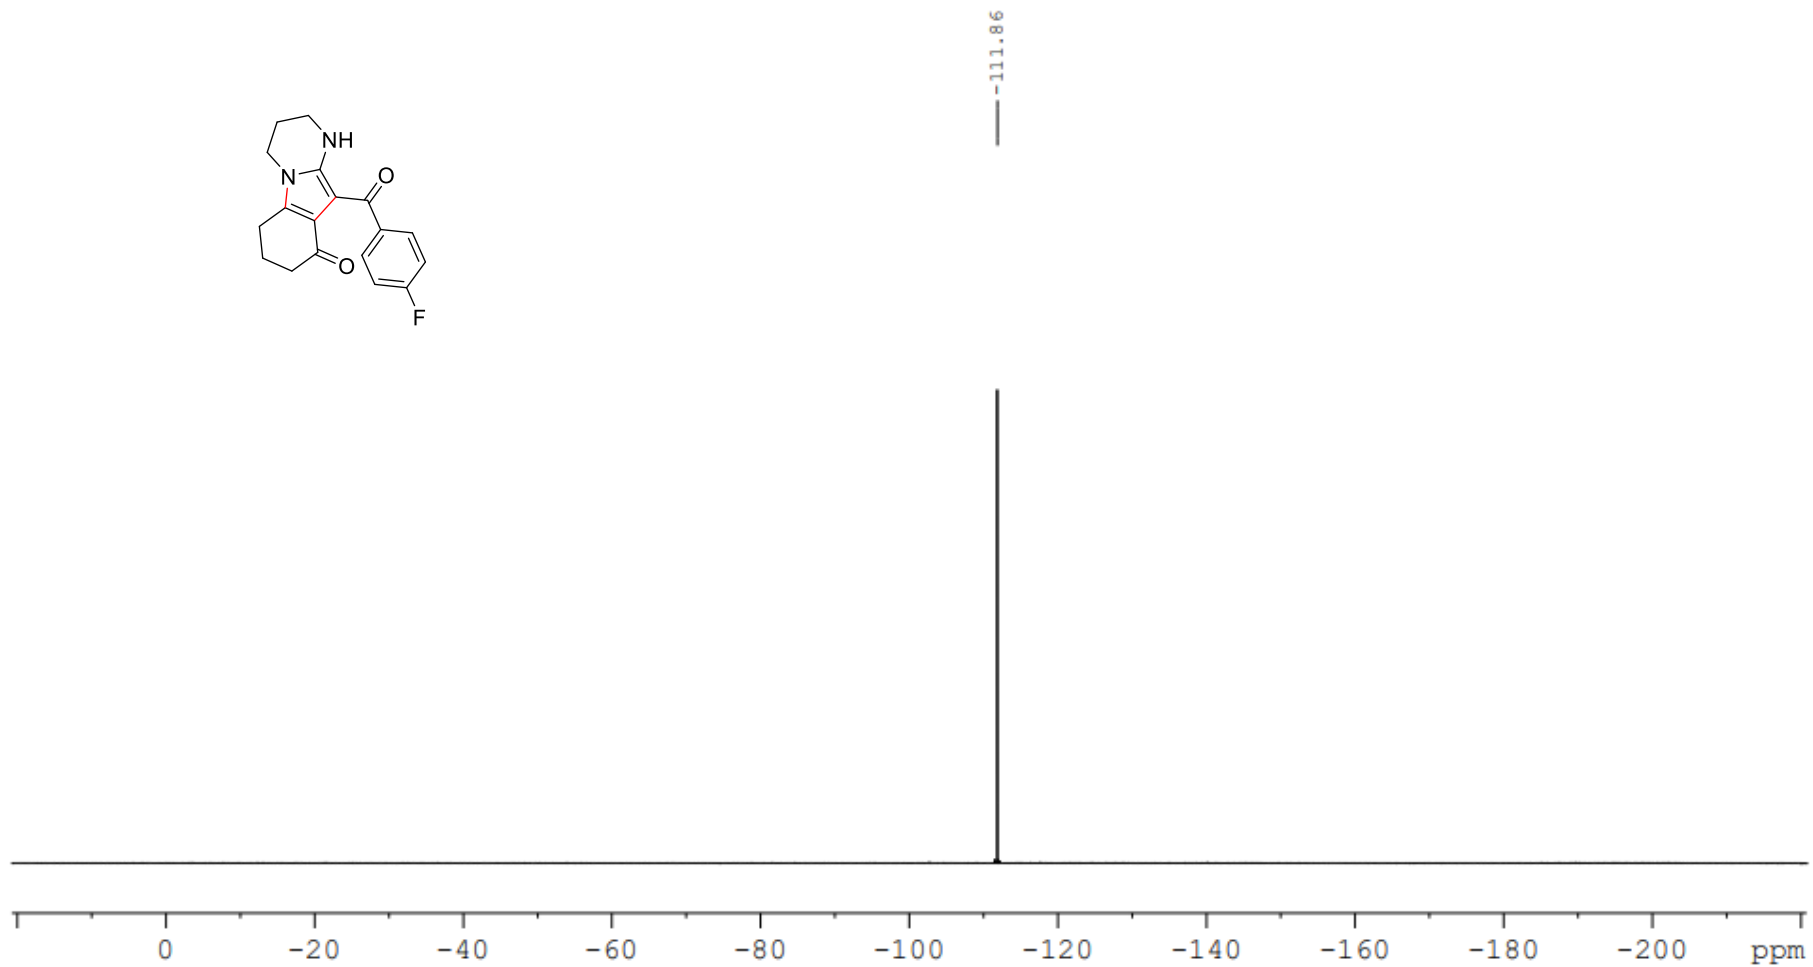

**Figure S11.**  $^{19}\text{F}$  NMR (475 MHz,  $\text{DMSO-}d_6$ ) spectra of compound **3d**



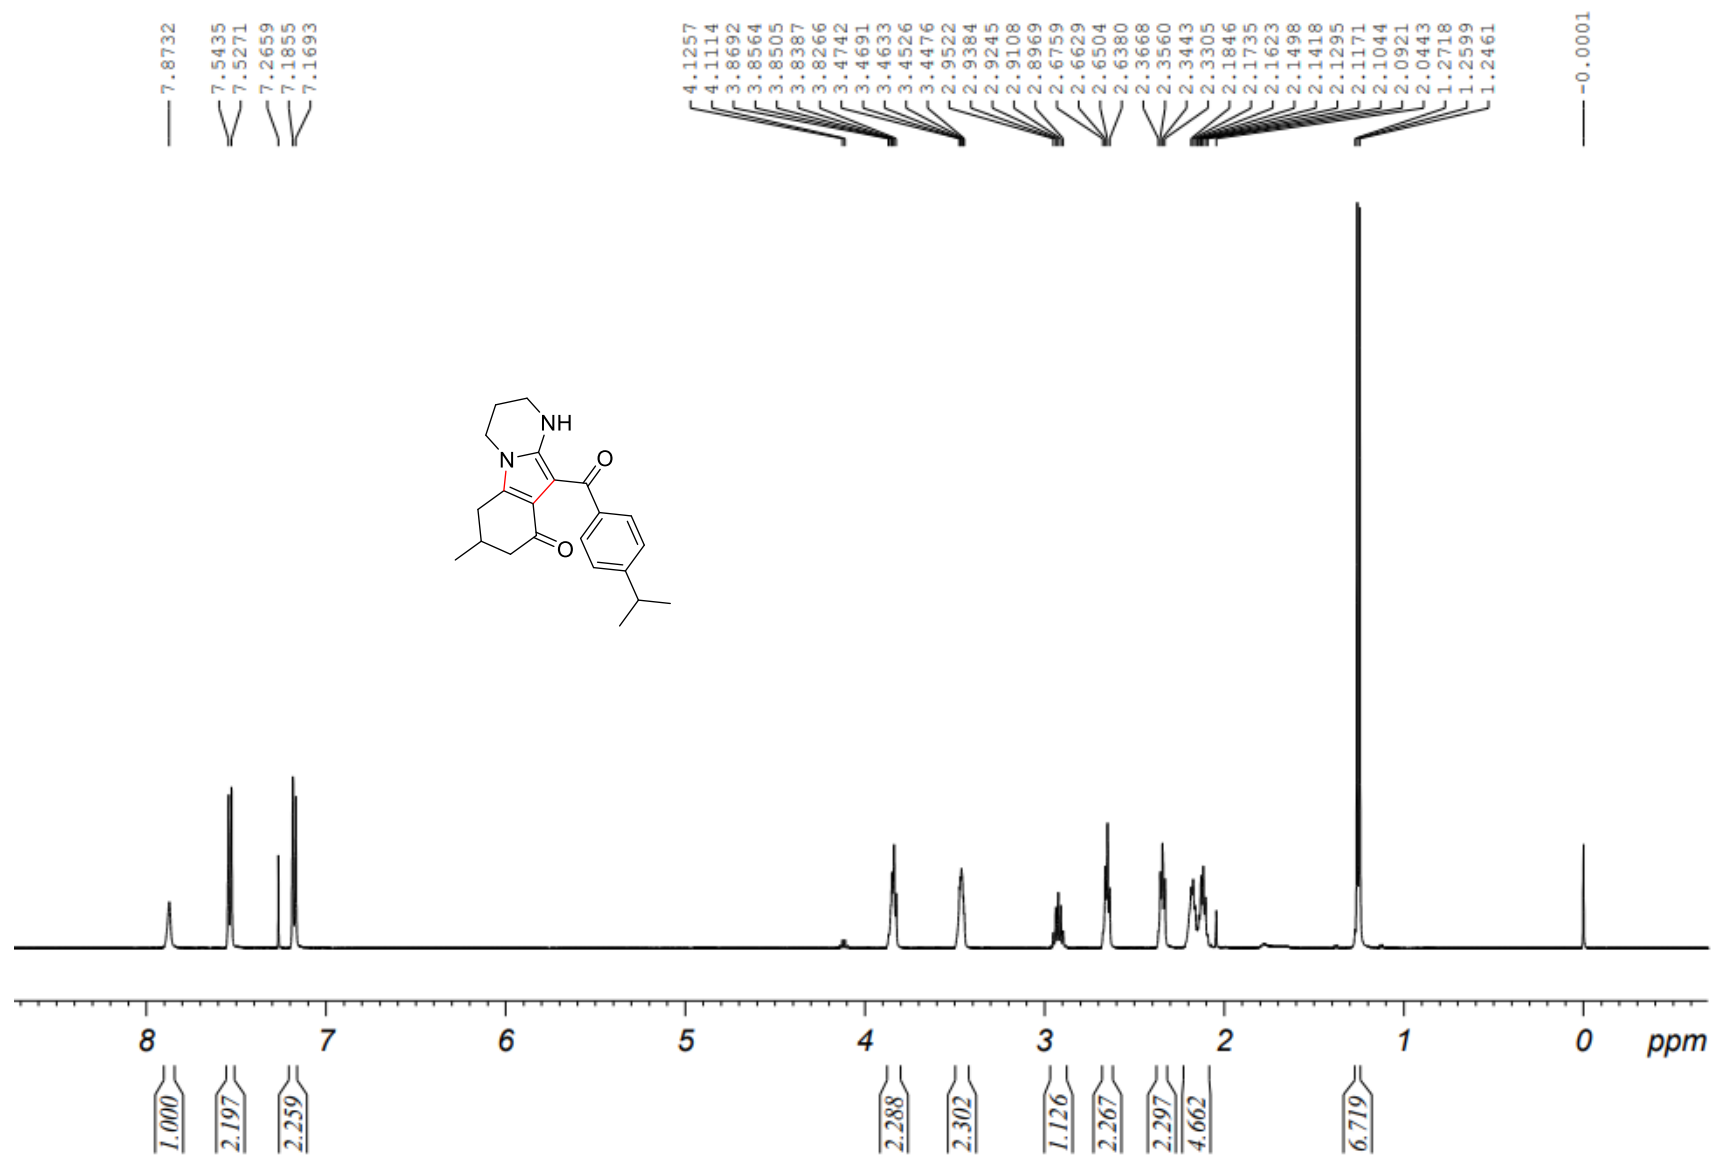

**Figure S12.** <sup>1</sup>H NMR (500 MHz, CDCl<sub>3</sub>-d<sub>6</sub>) spectra of compound **3e**

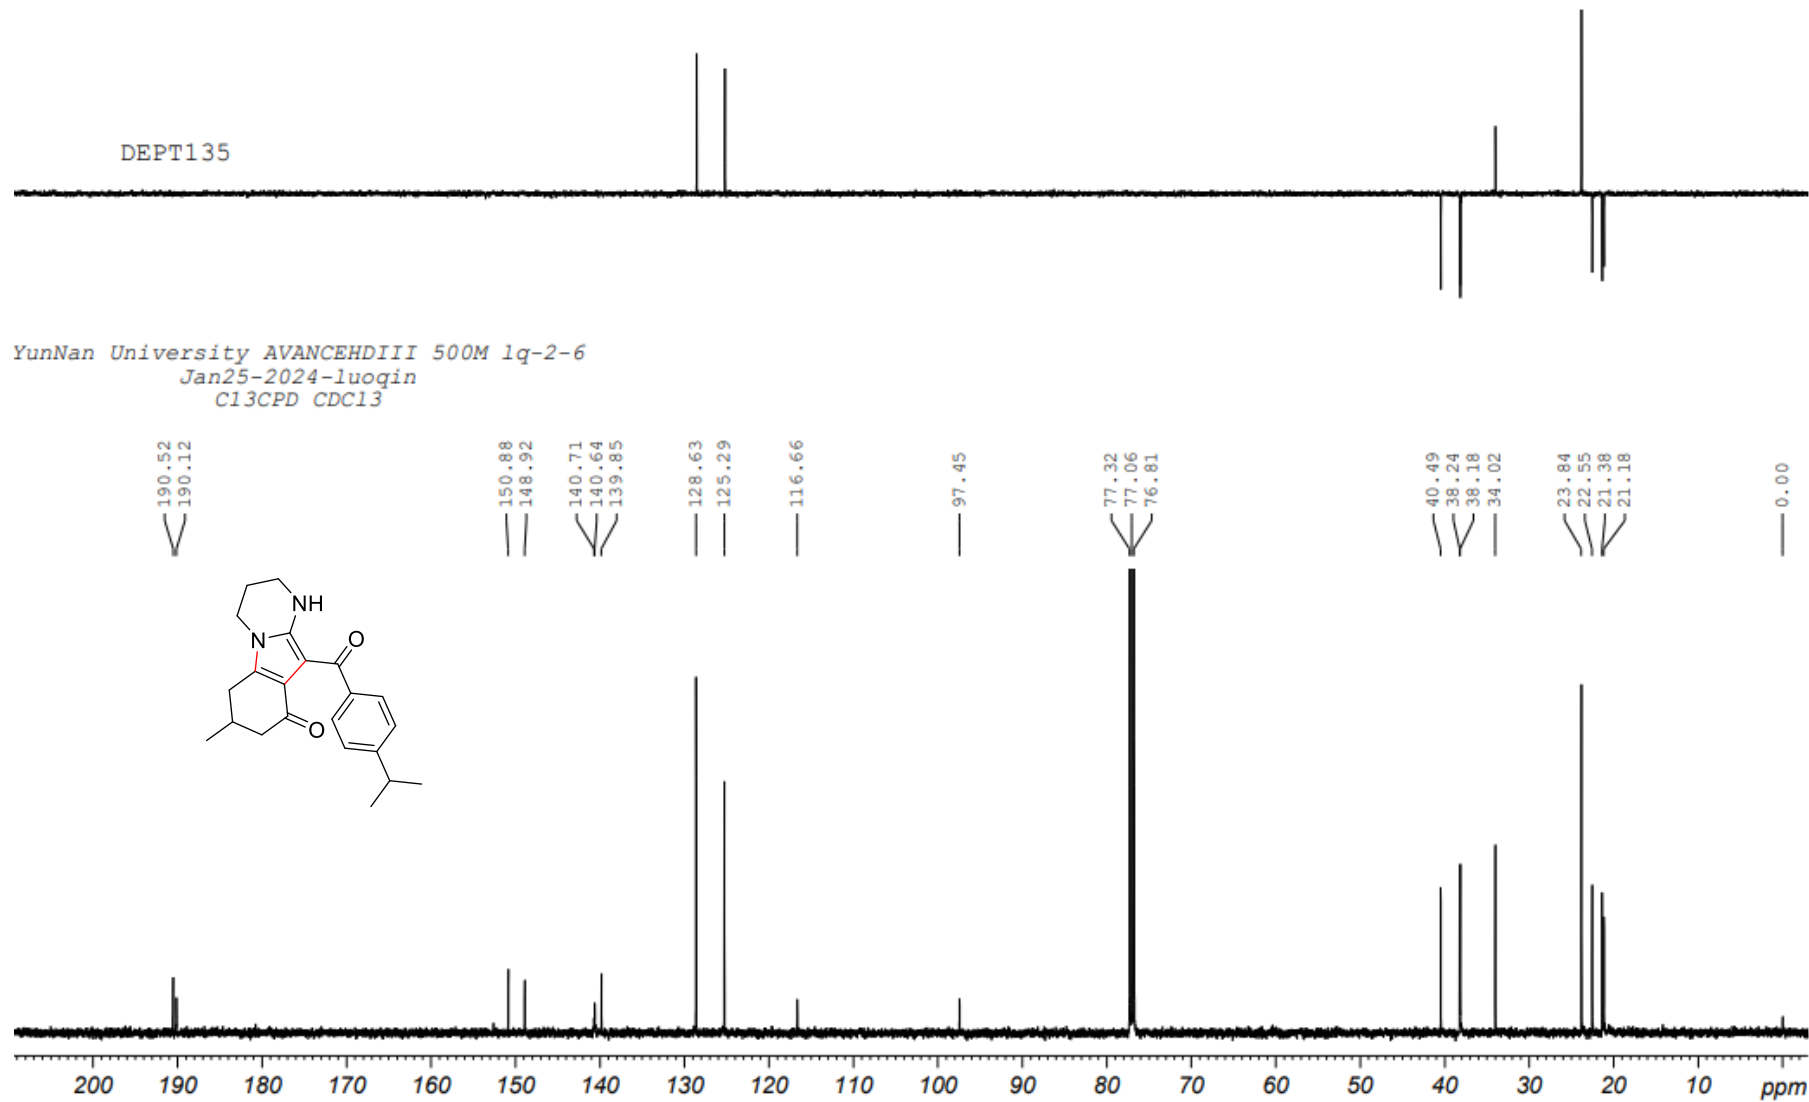

Figure S13. <sup>13</sup>C NMR (125 MHz, CDCl<sub>3</sub>-d<sub>6</sub>) spectra of compound **3e**

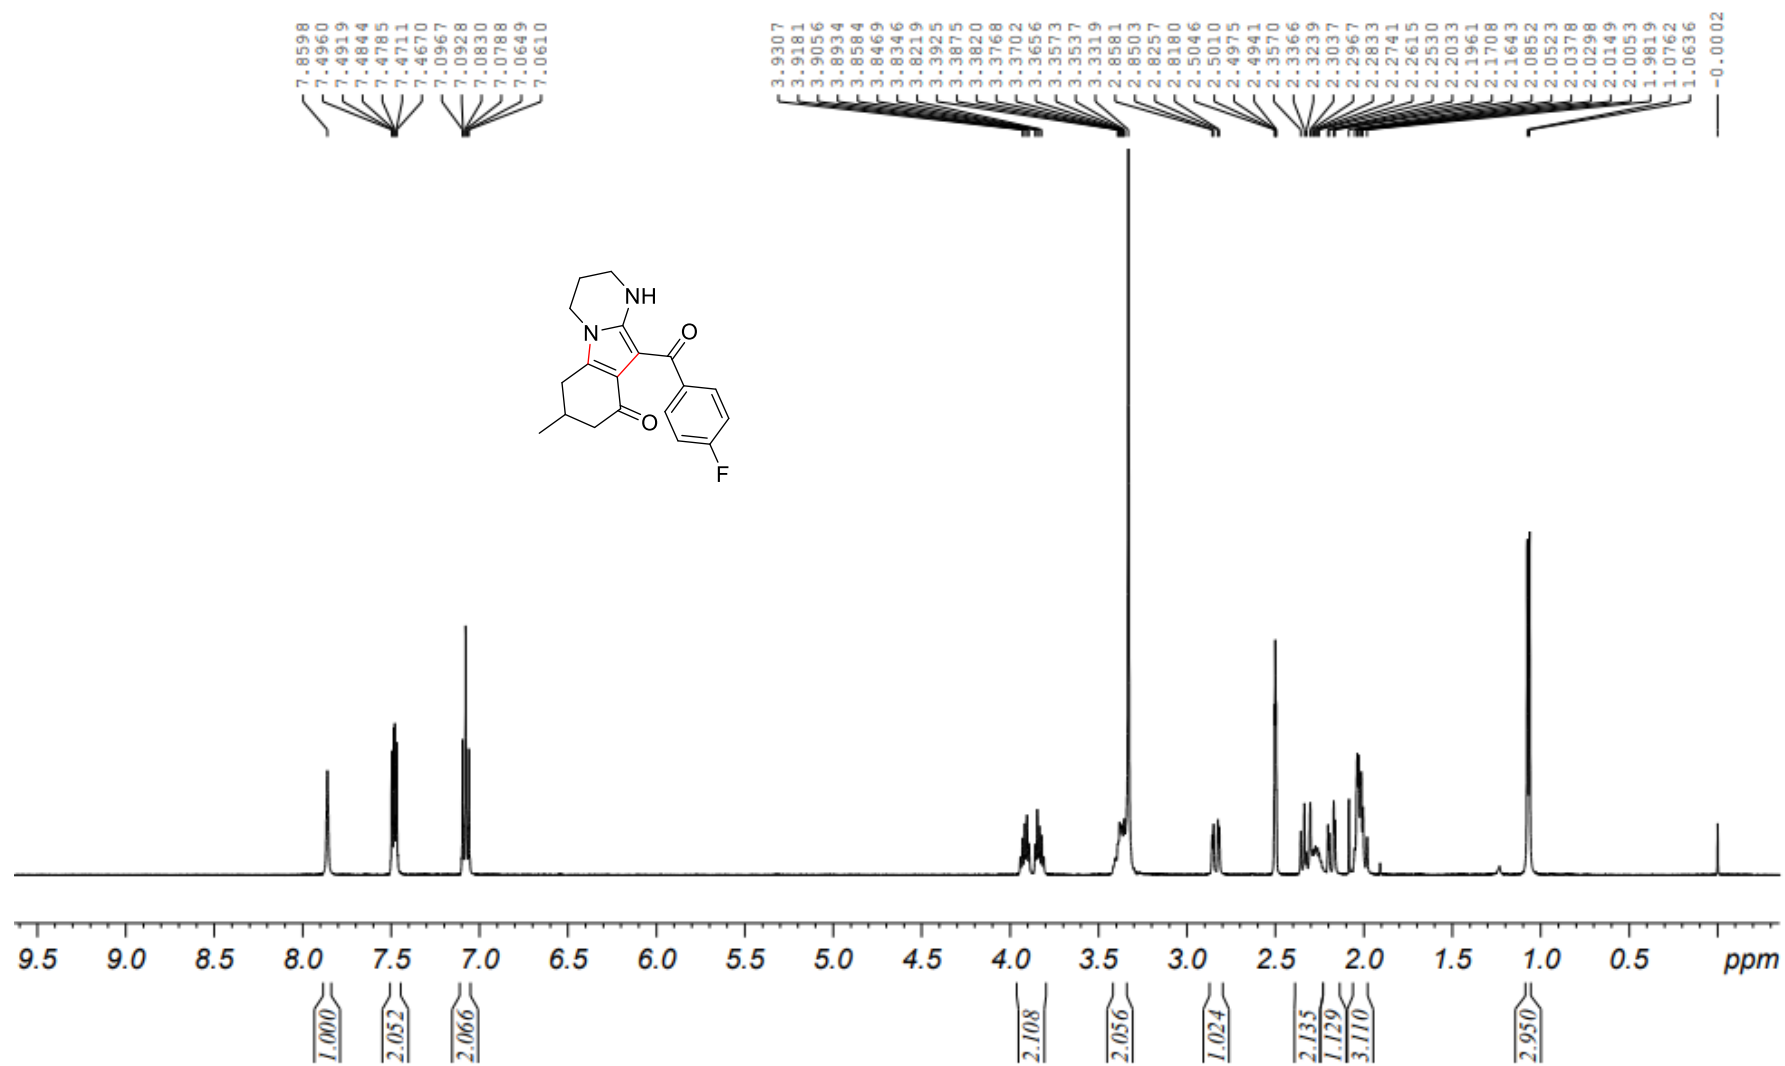

**Figure S14.** <sup>1</sup>H NMR (500 MHz, DMSO-*d*<sub>6</sub>) spectra of compound **3f**

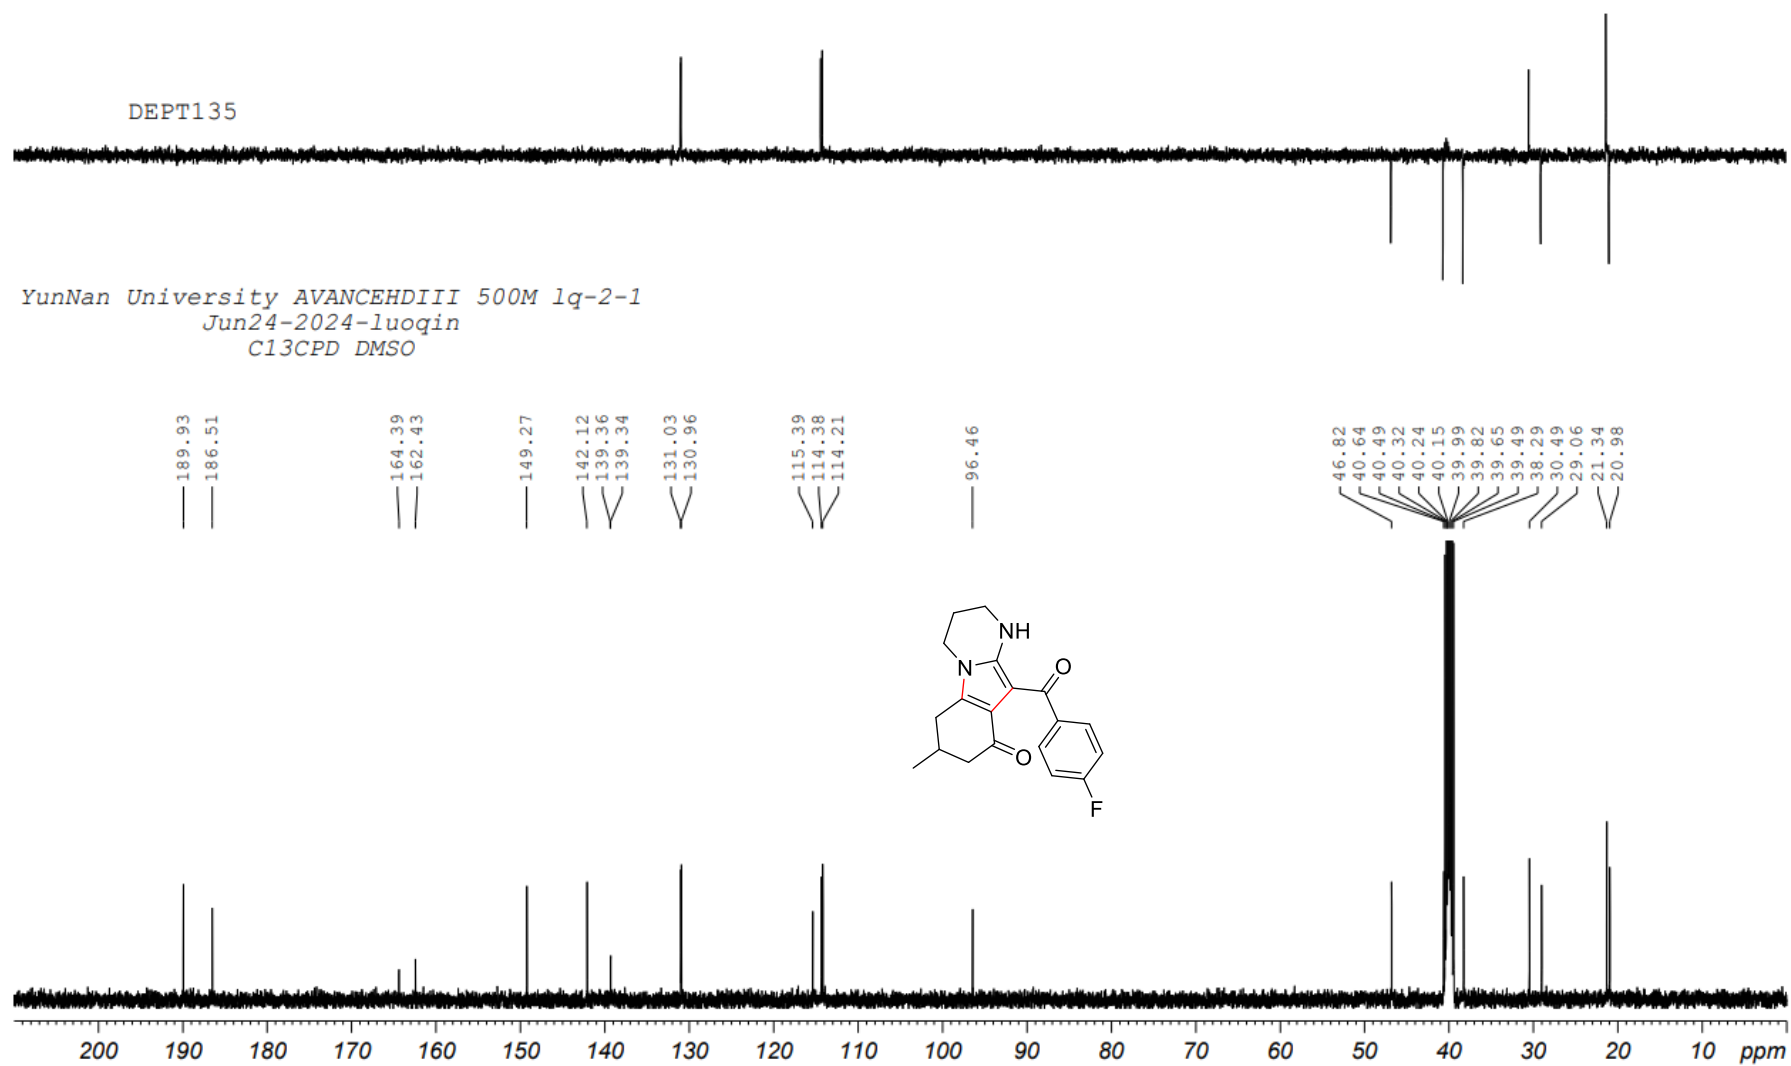

Figure S15.  $^{13}\text{C}$  NMR (125 MHz,  $\text{DMSO-}d_6$ ) spectra of compound **3f**

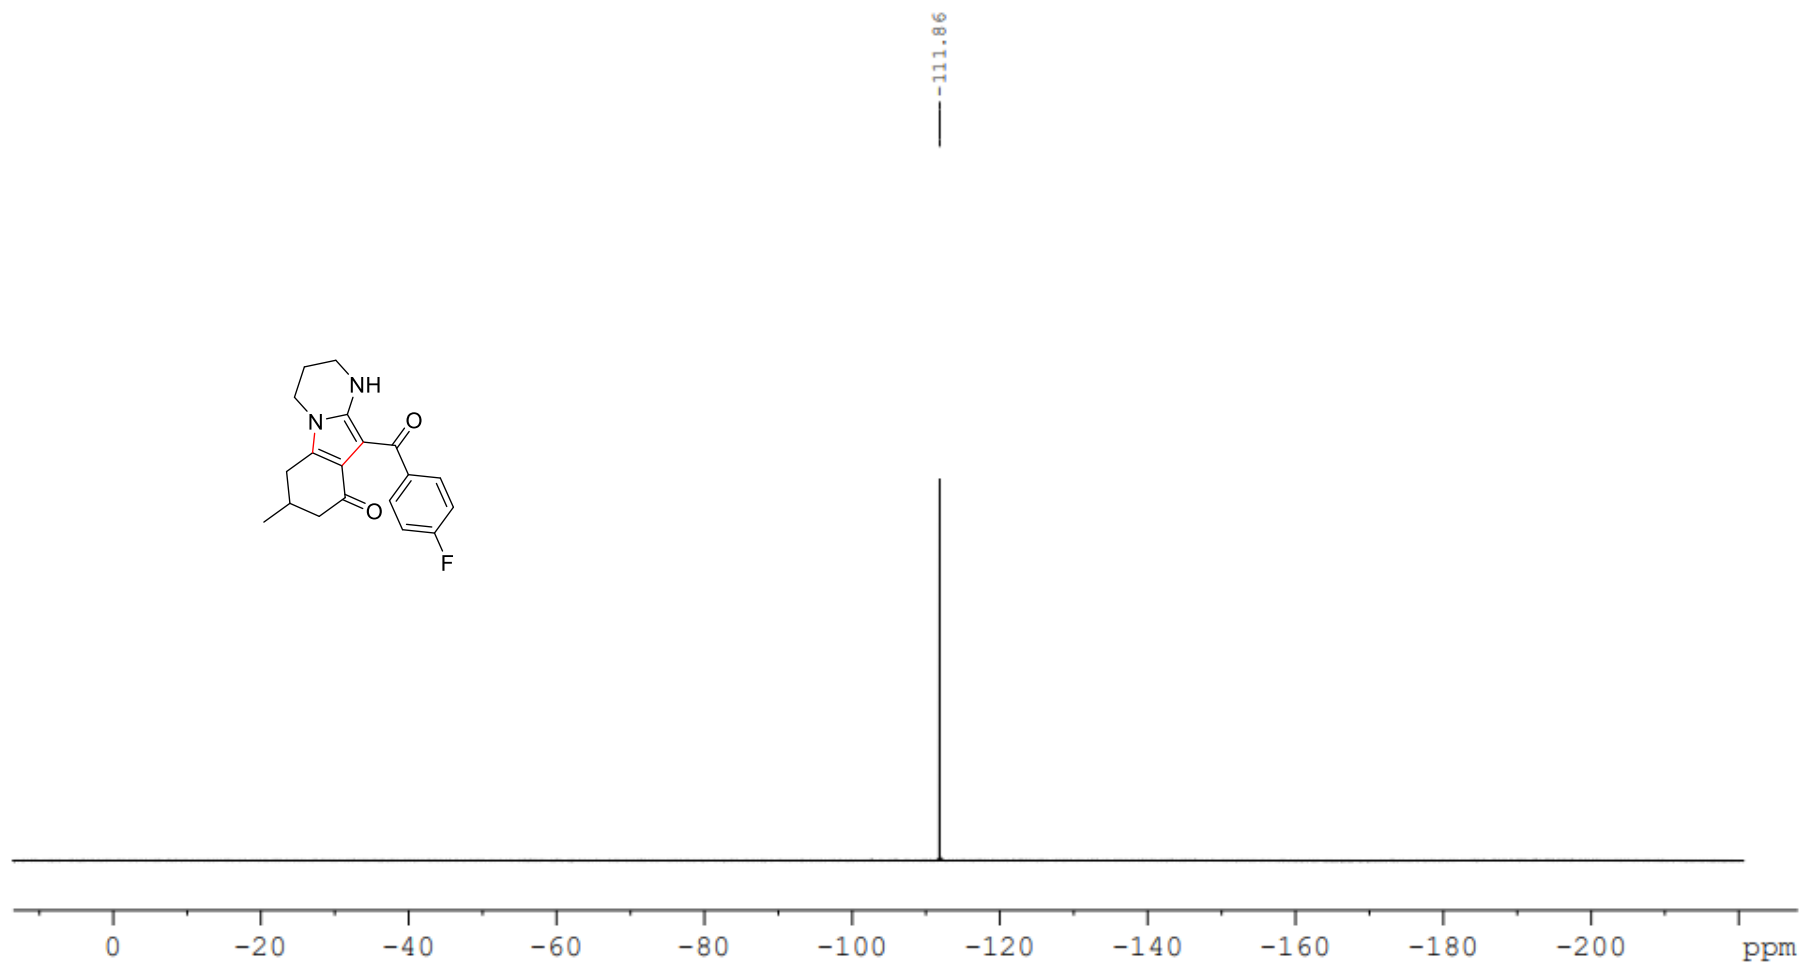

**Figure S16.**  $^{19}\text{F}$  NMR (475 MHz,  $\text{DMSO-}d_6$ ) spectra of compound **3f**

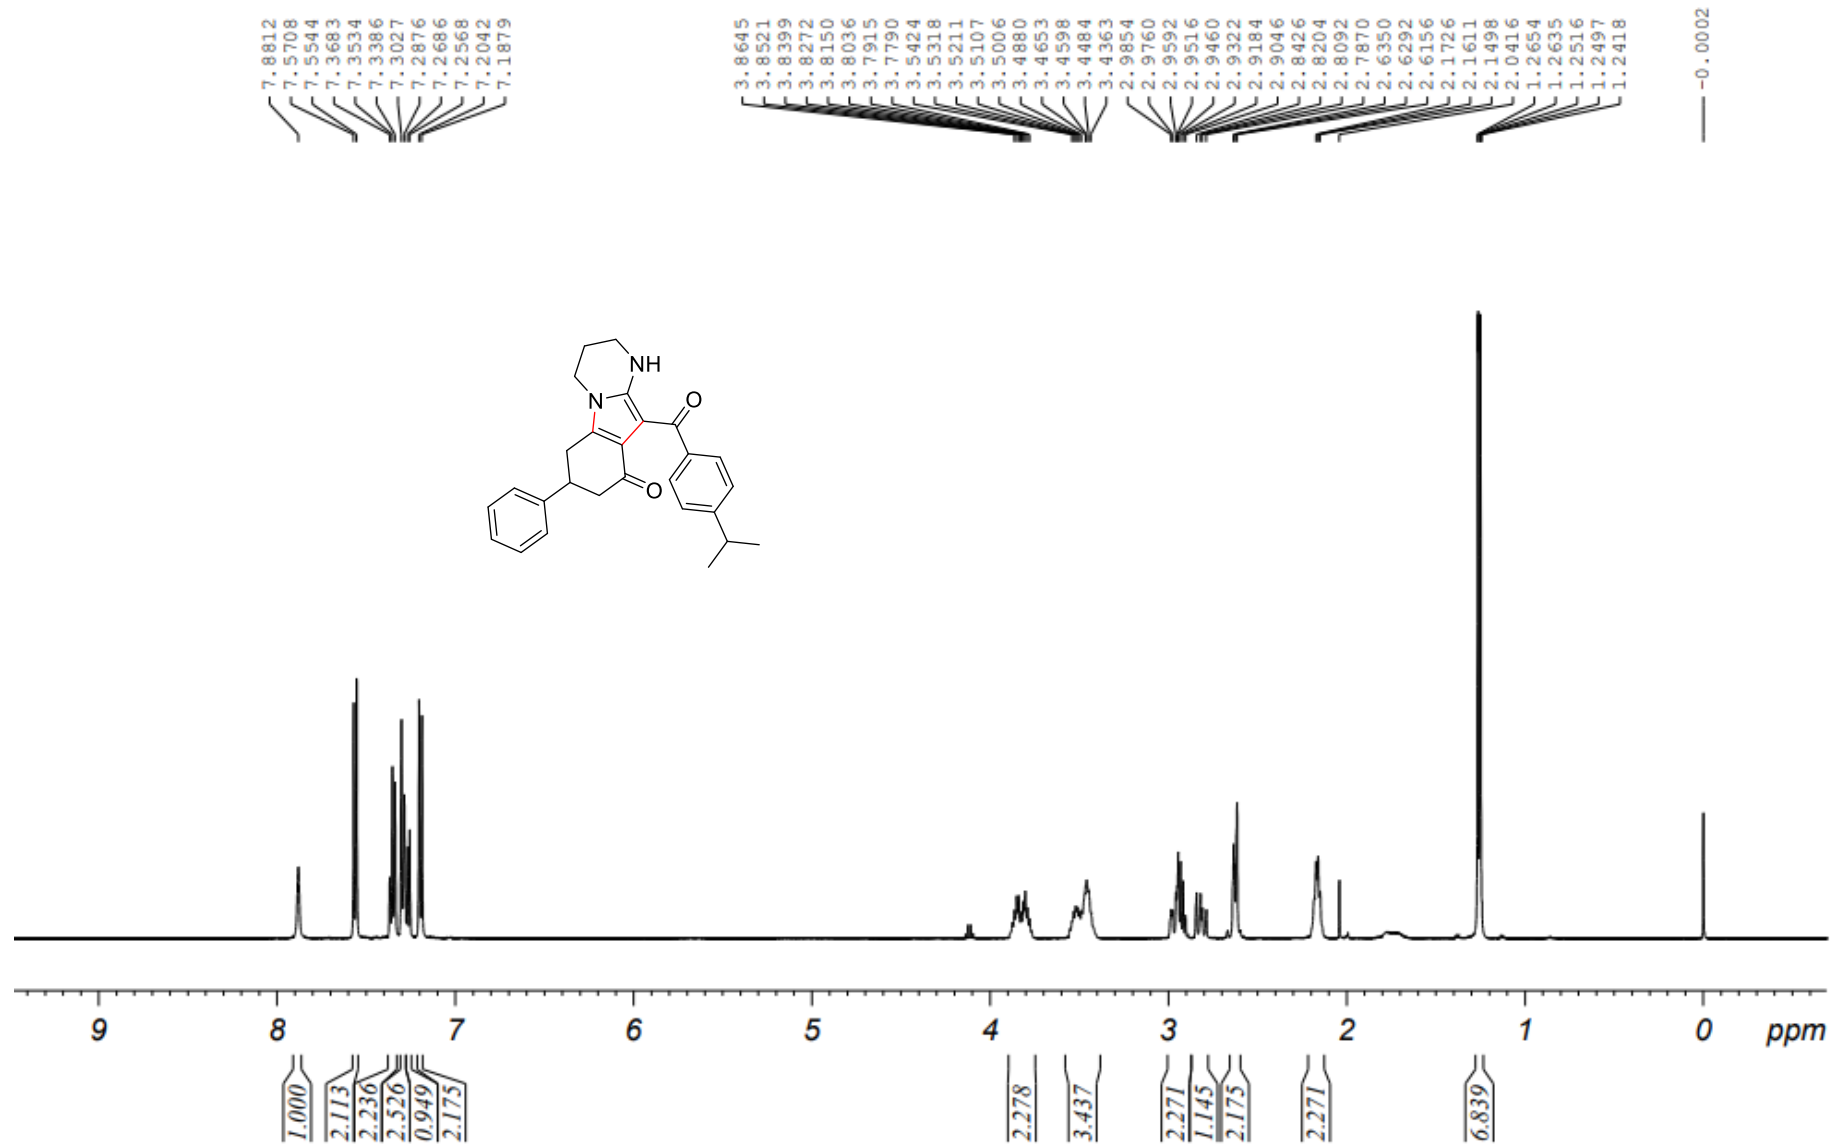

Figure S17.  $^1\text{H}$  NMR (500 MHz,  $\text{CDCl}_3-d_6$ ) spectra of compound **3g**

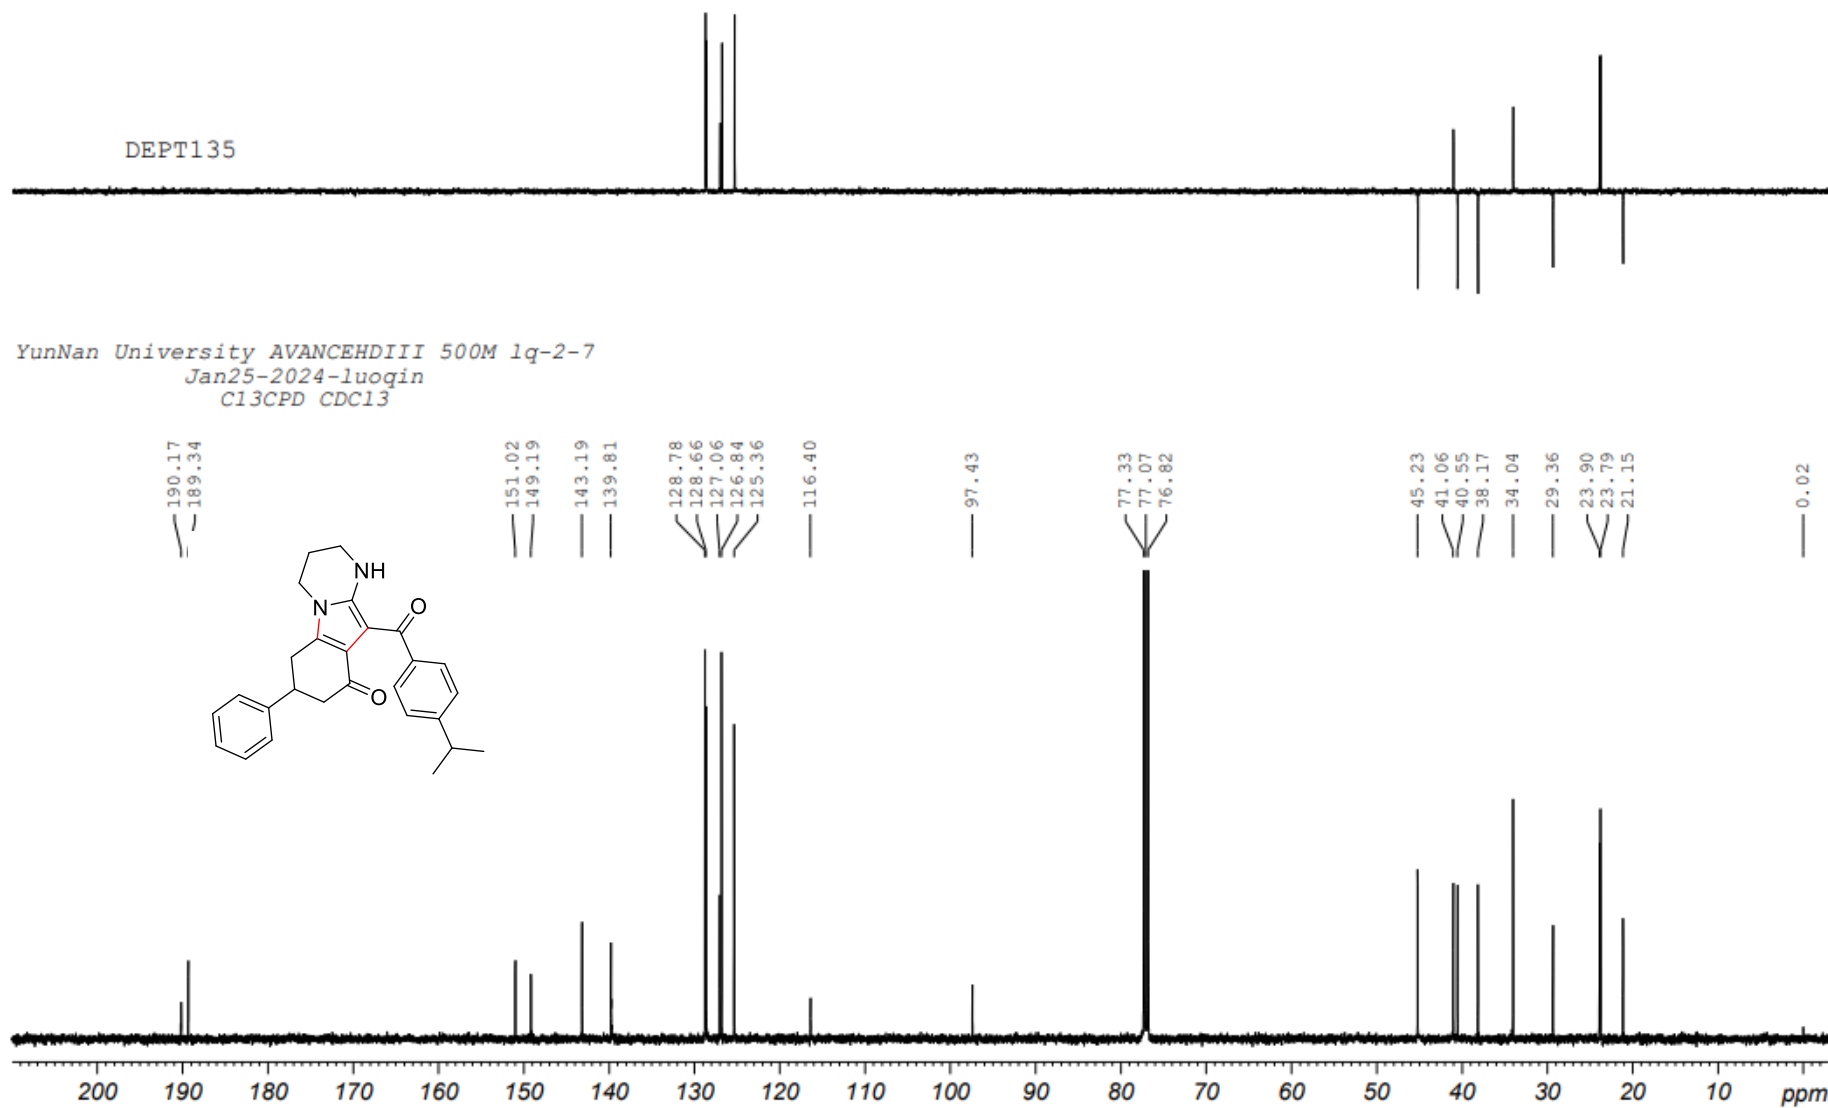

Figure S18.  $^{13}\text{C}$  NMR (125 MHz,  $\text{CDCl}_3-d_6$ ) spectra of compound **3g**

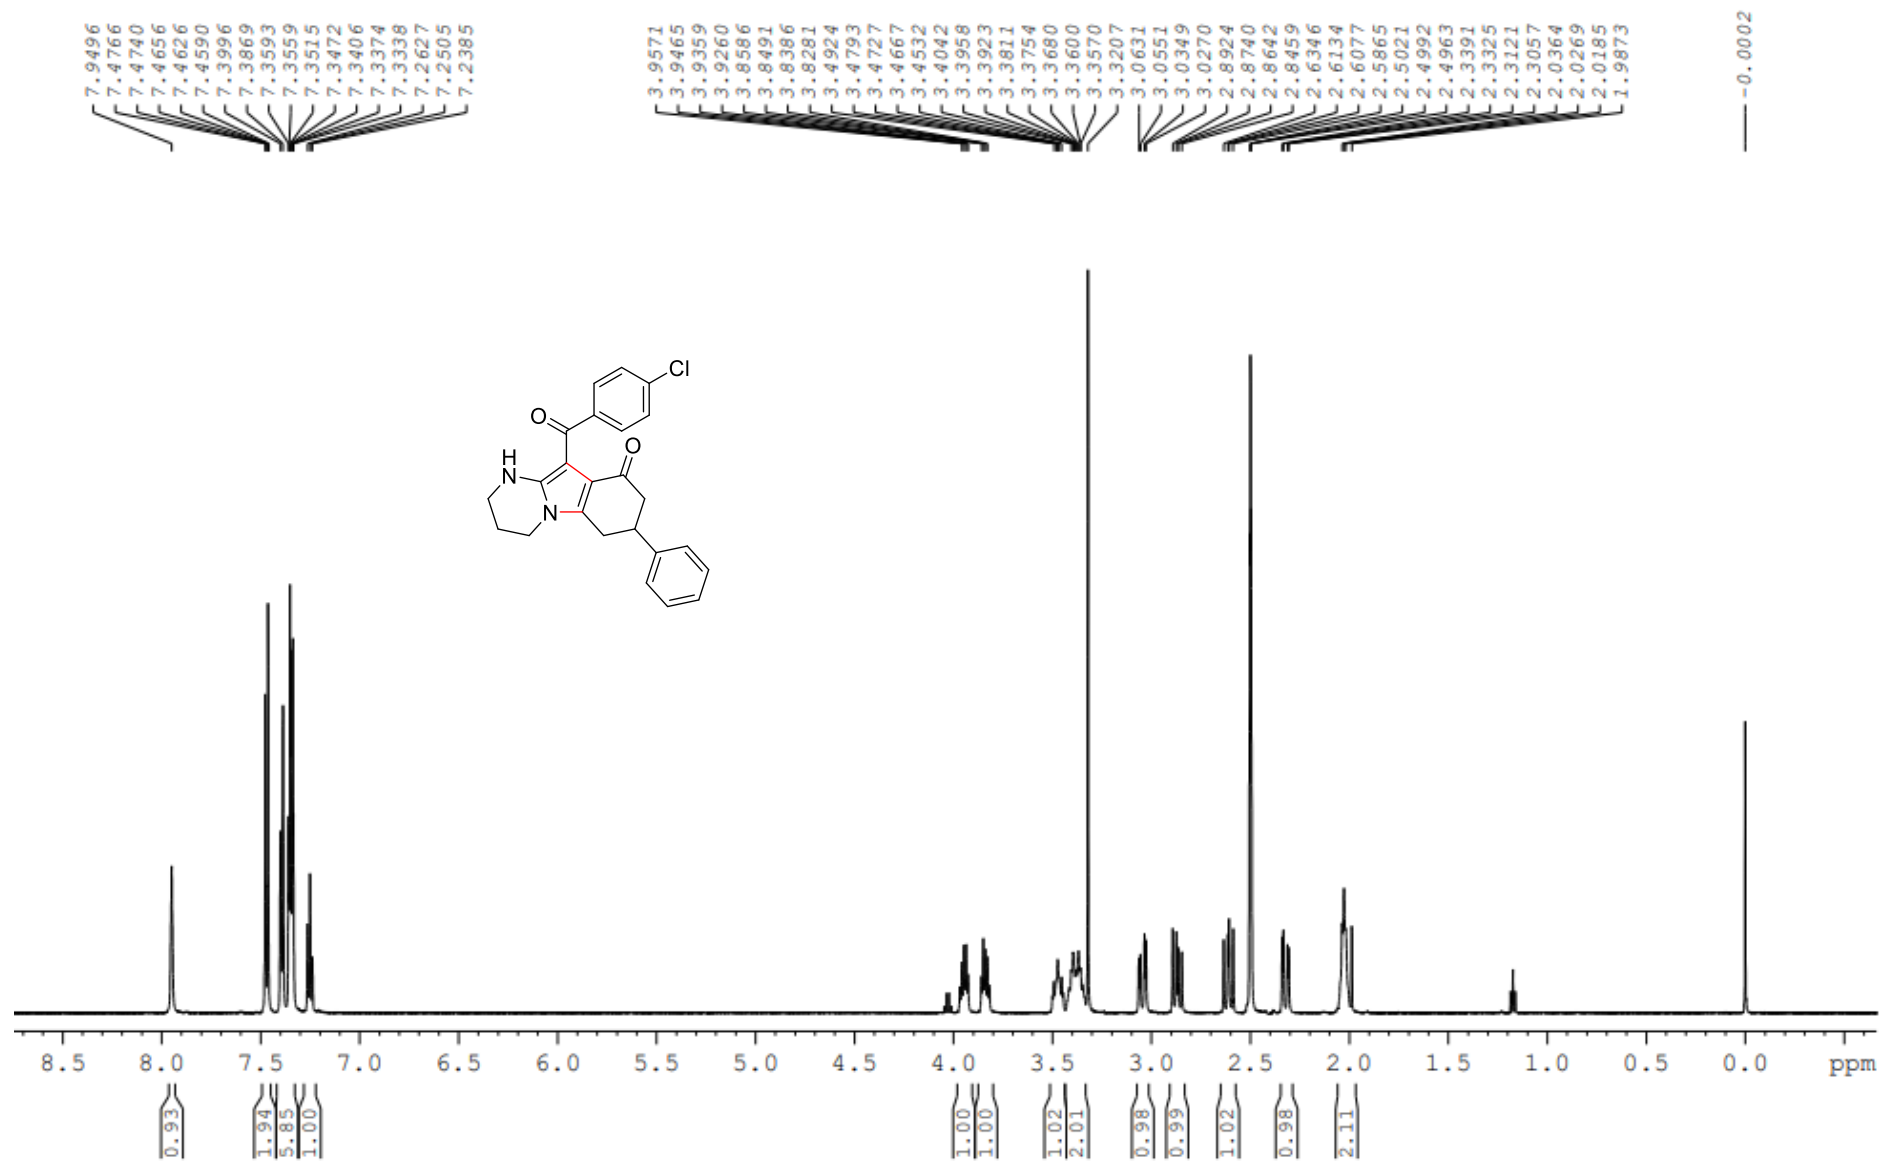

**Figure S19.**  $^1\text{H NMR}$  (600 MHz,  $\text{DMSO-}d_6$ ) spectra of compound **3h**



DEPT135

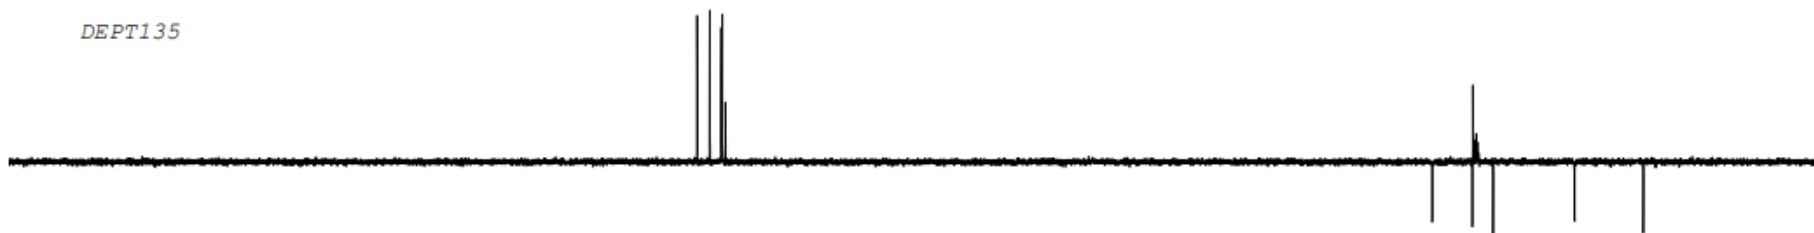

YUNNAN UNIVERSITY ASCEND AVIIIHD600 1q-2-25  
Apr19-2024-luoqin  
C13CPD DMSO

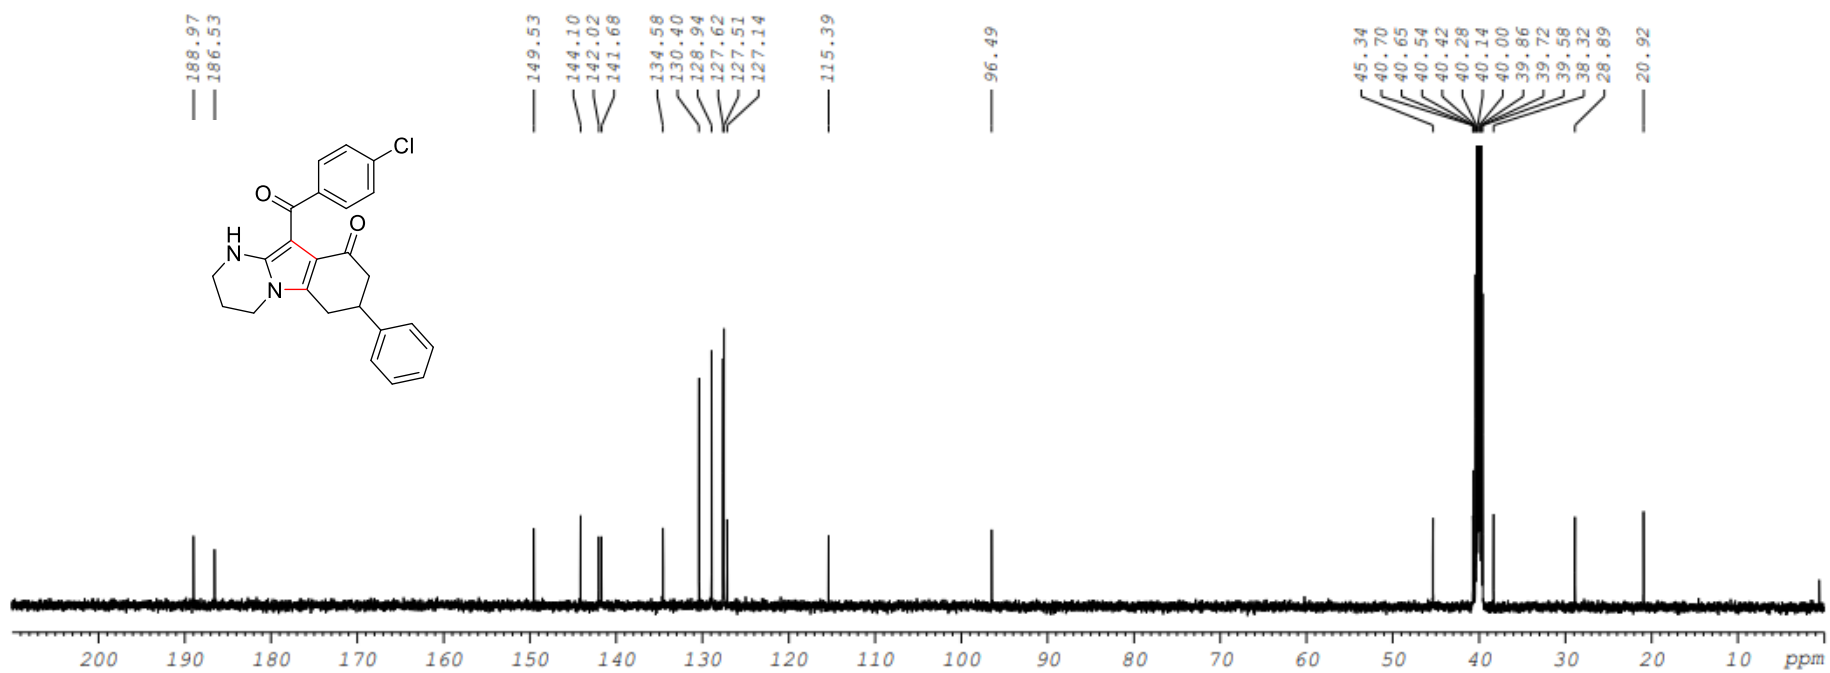

Figure S20.  $^{13}\text{C}$  NMR (150 MHz, DMSO- $d_6$ ) spectra of compound 3h

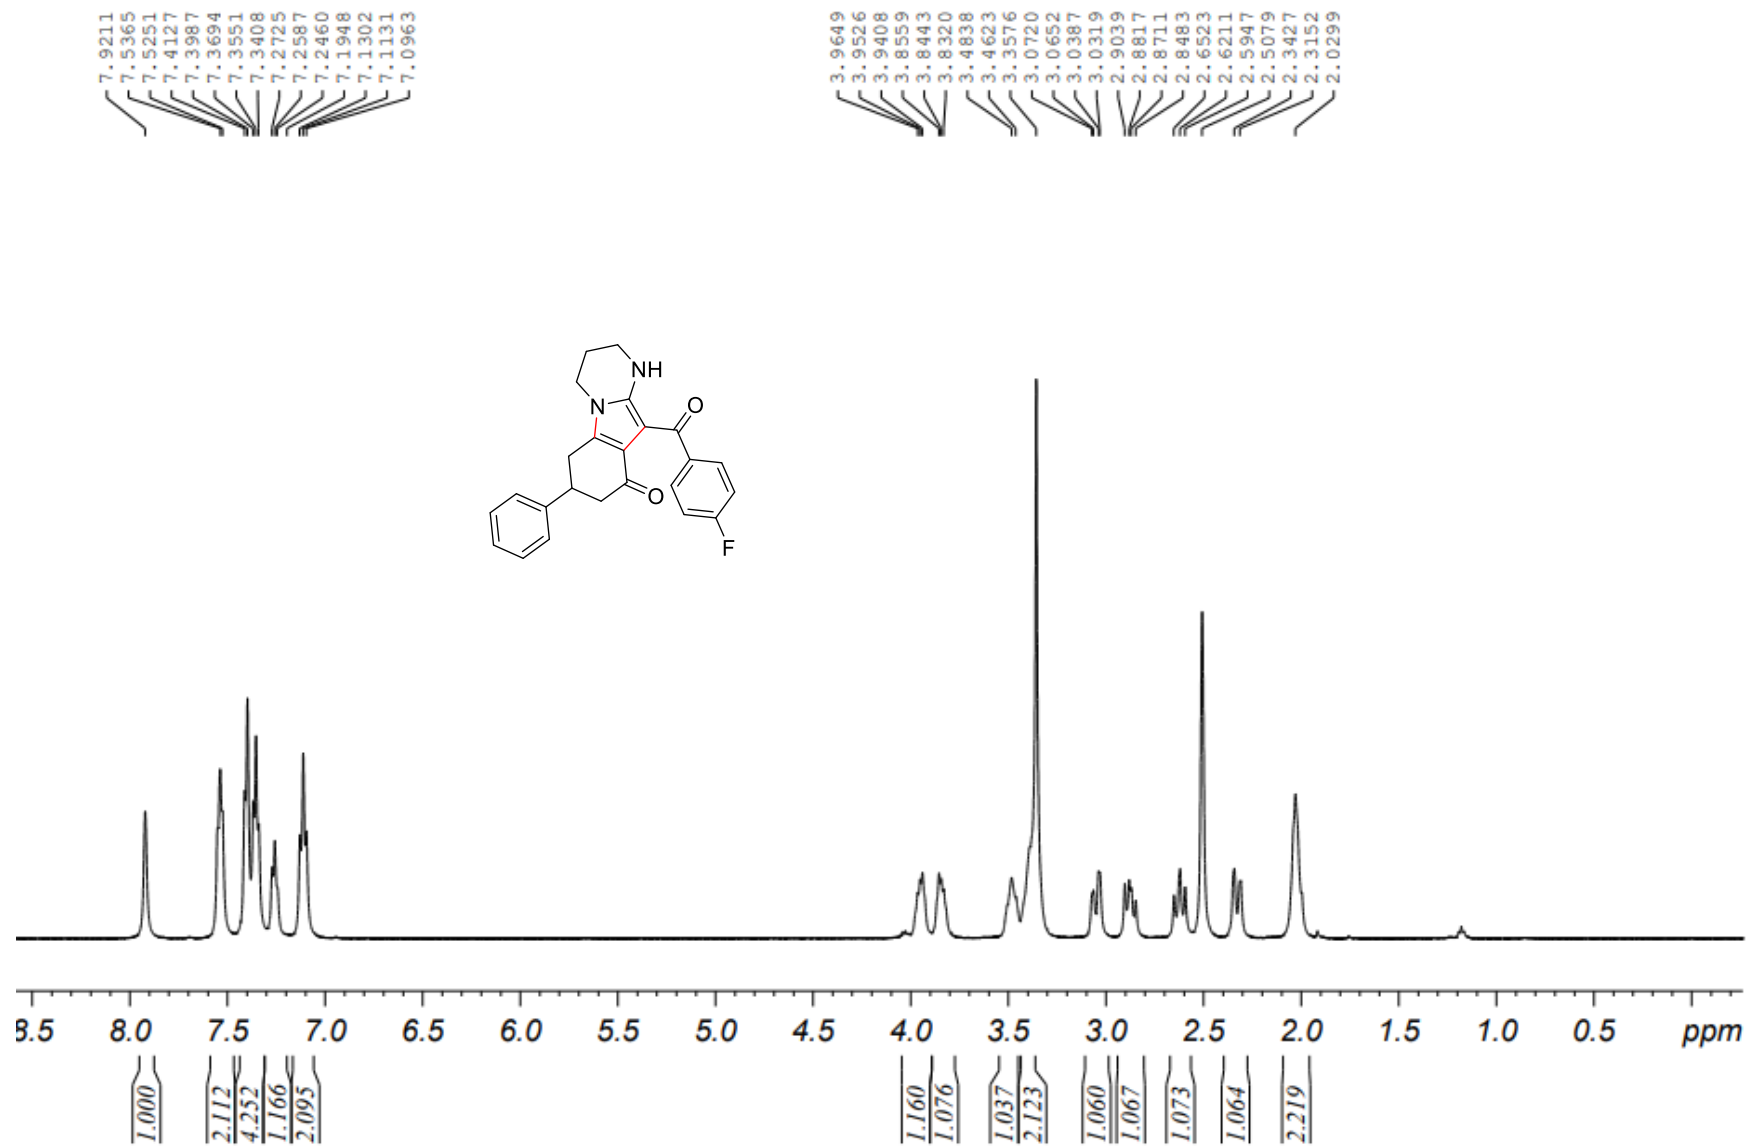

**Figure S21.**  $^1\text{H}$  NMR (500 MHz, DMSO- $d_6$ ) spectra of compound **3i**

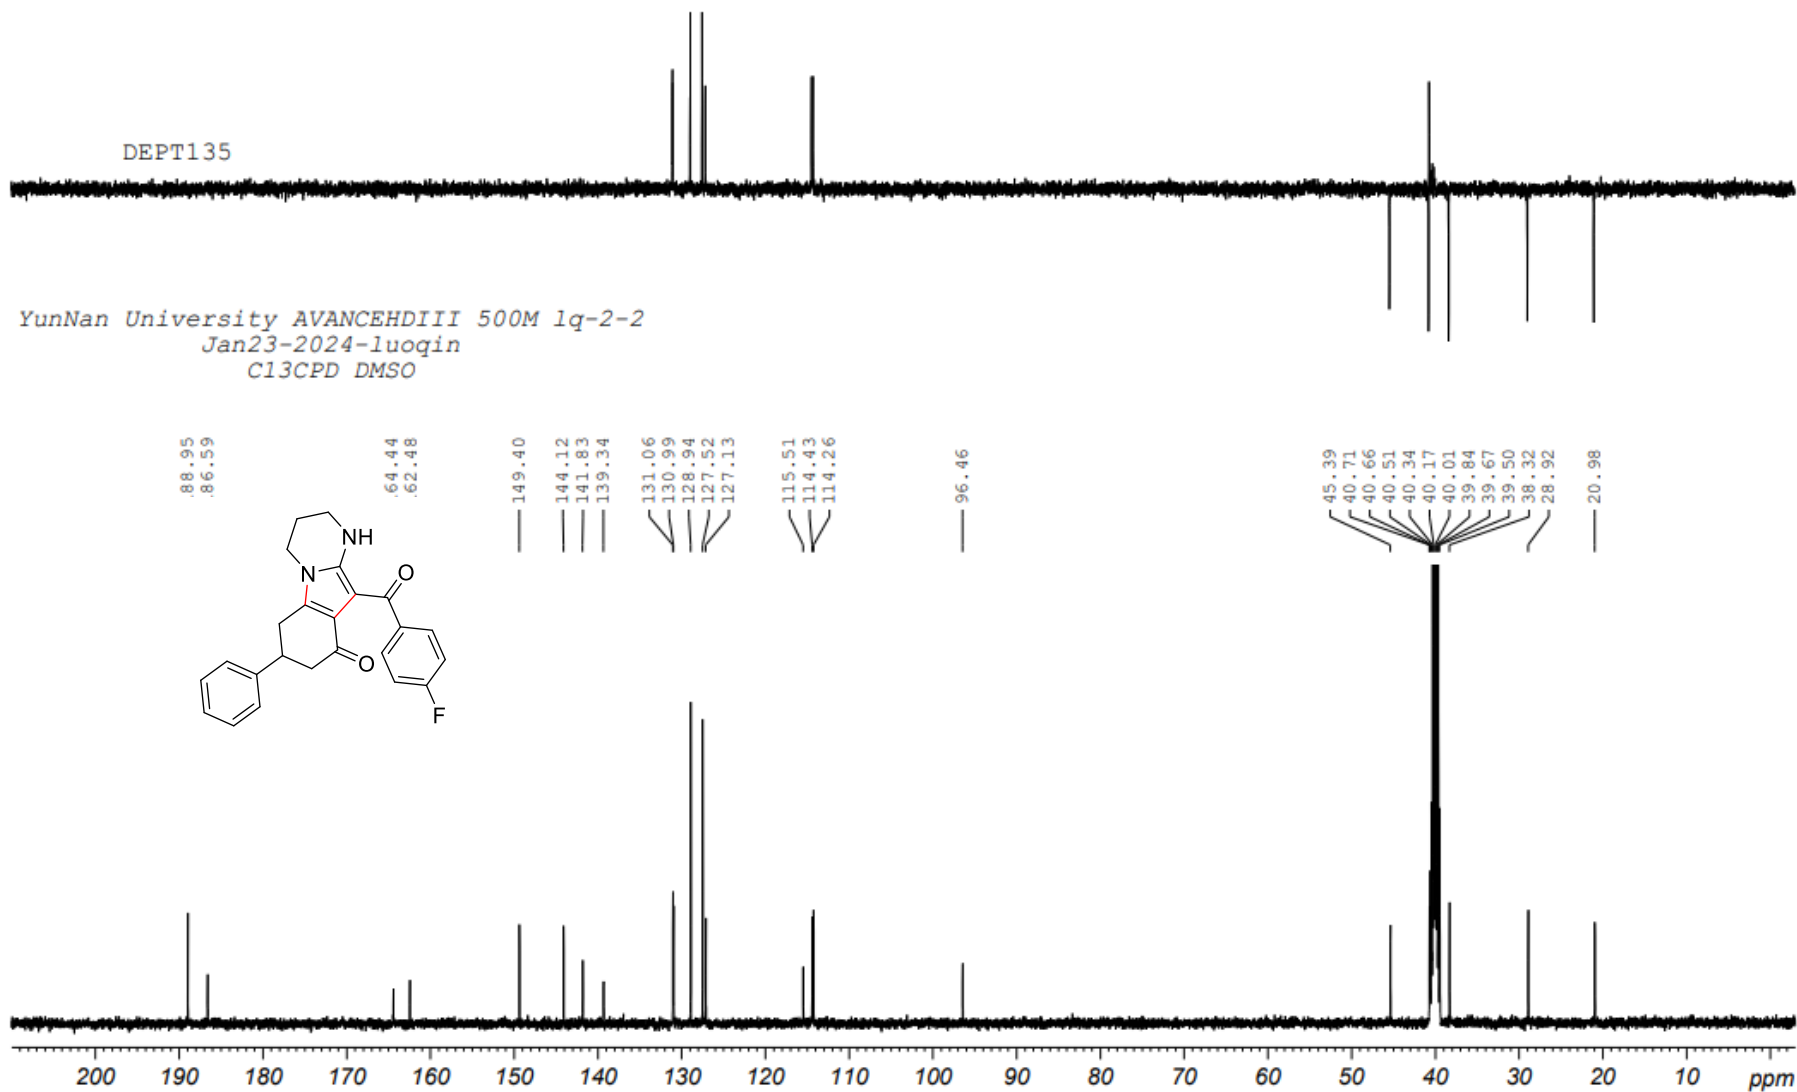

Figure S22.  $^{13}\text{C}$  NMR (125 MHz, DMSO- $d_6$ ) spectra of compound **3i**

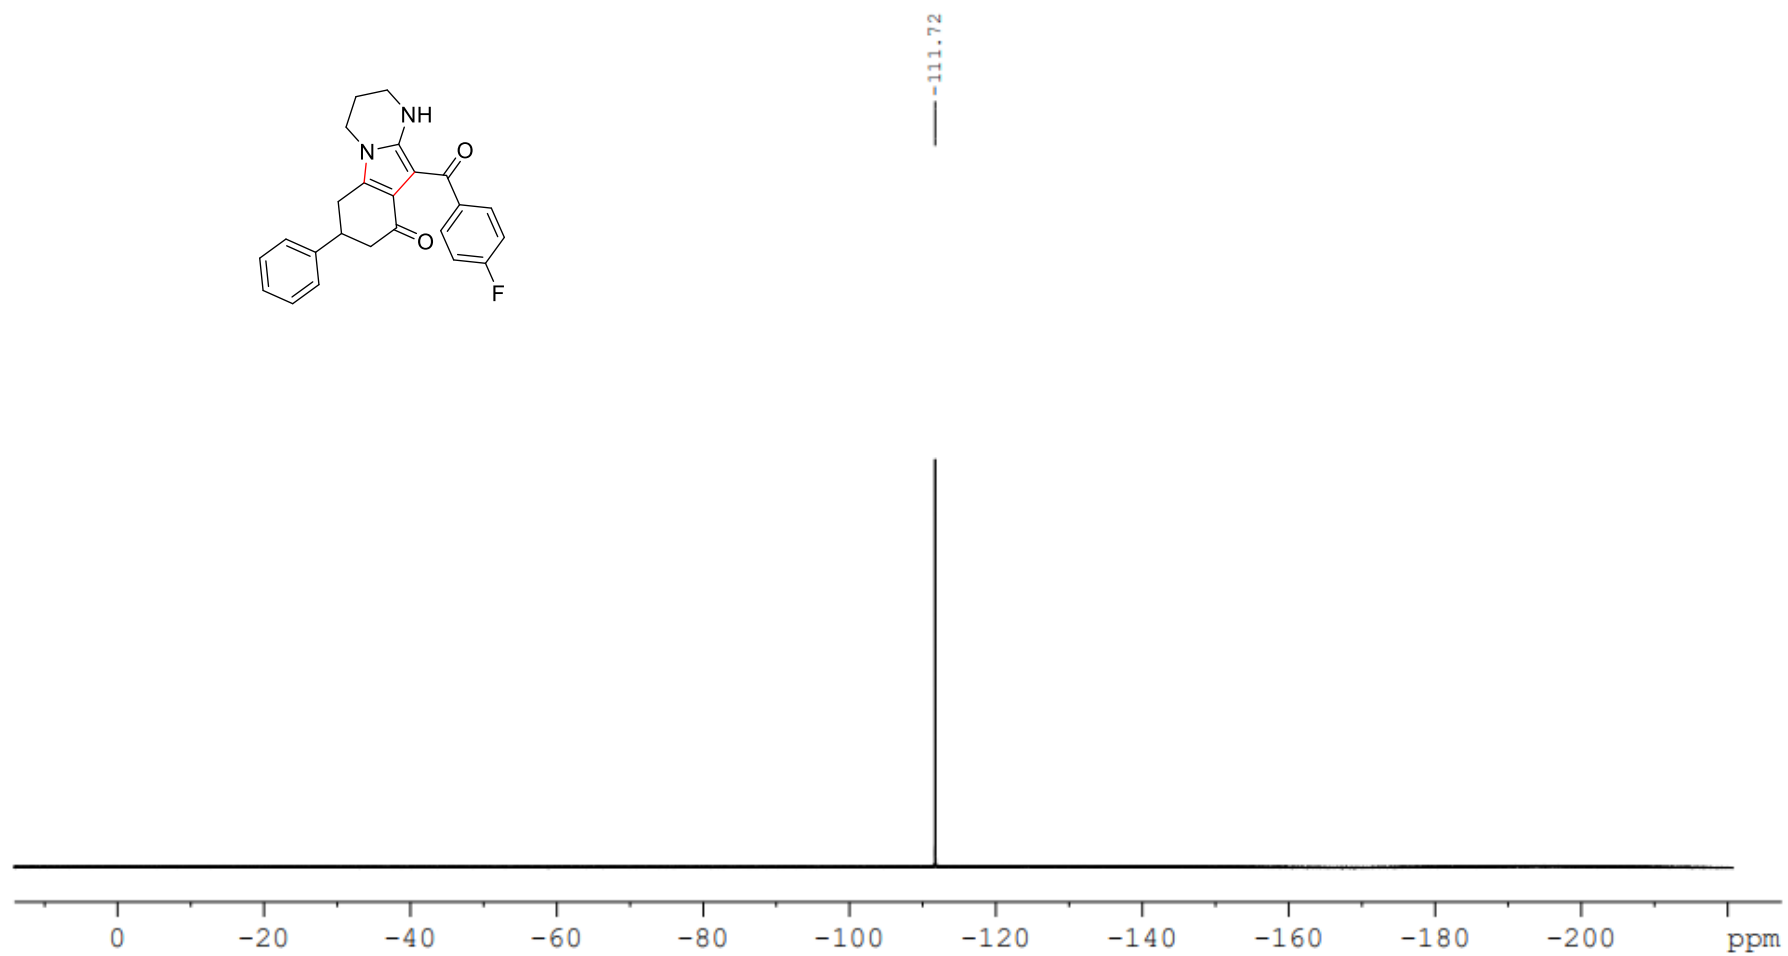

**Figure S23.**  $^{19}\text{F}$  NMR (475 MHz,  $\text{DMSO-}d_6$ ) spectra of compound **3i**

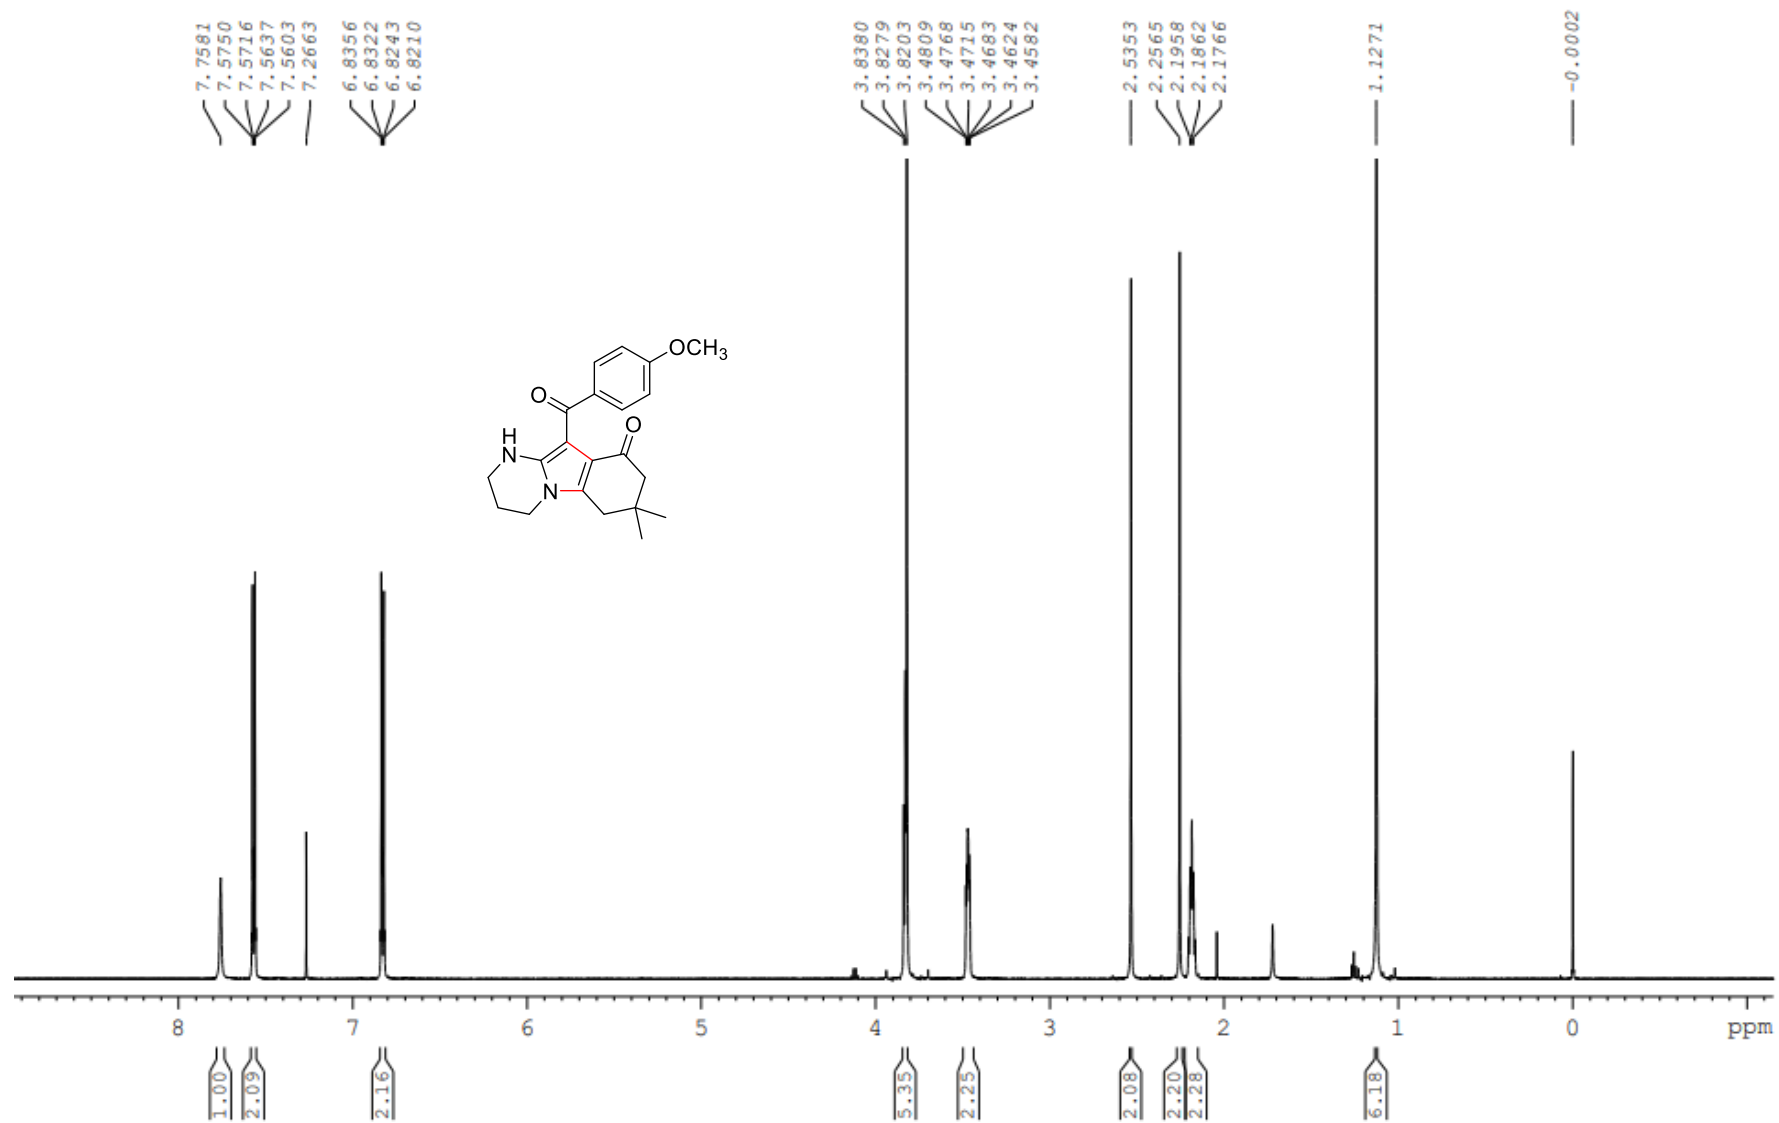

**Figure S24.**  $^1\text{H NMR}$  (600 MHz,  $\text{CDCl}_3-d_6$ ) spectra of compound **3j**

DEPT135

YUNNAN UNIVERSITY ASCEND AVIIIHD600 1q-2-24  
Apr19-2024-luoqin  
C13CPD CDC13

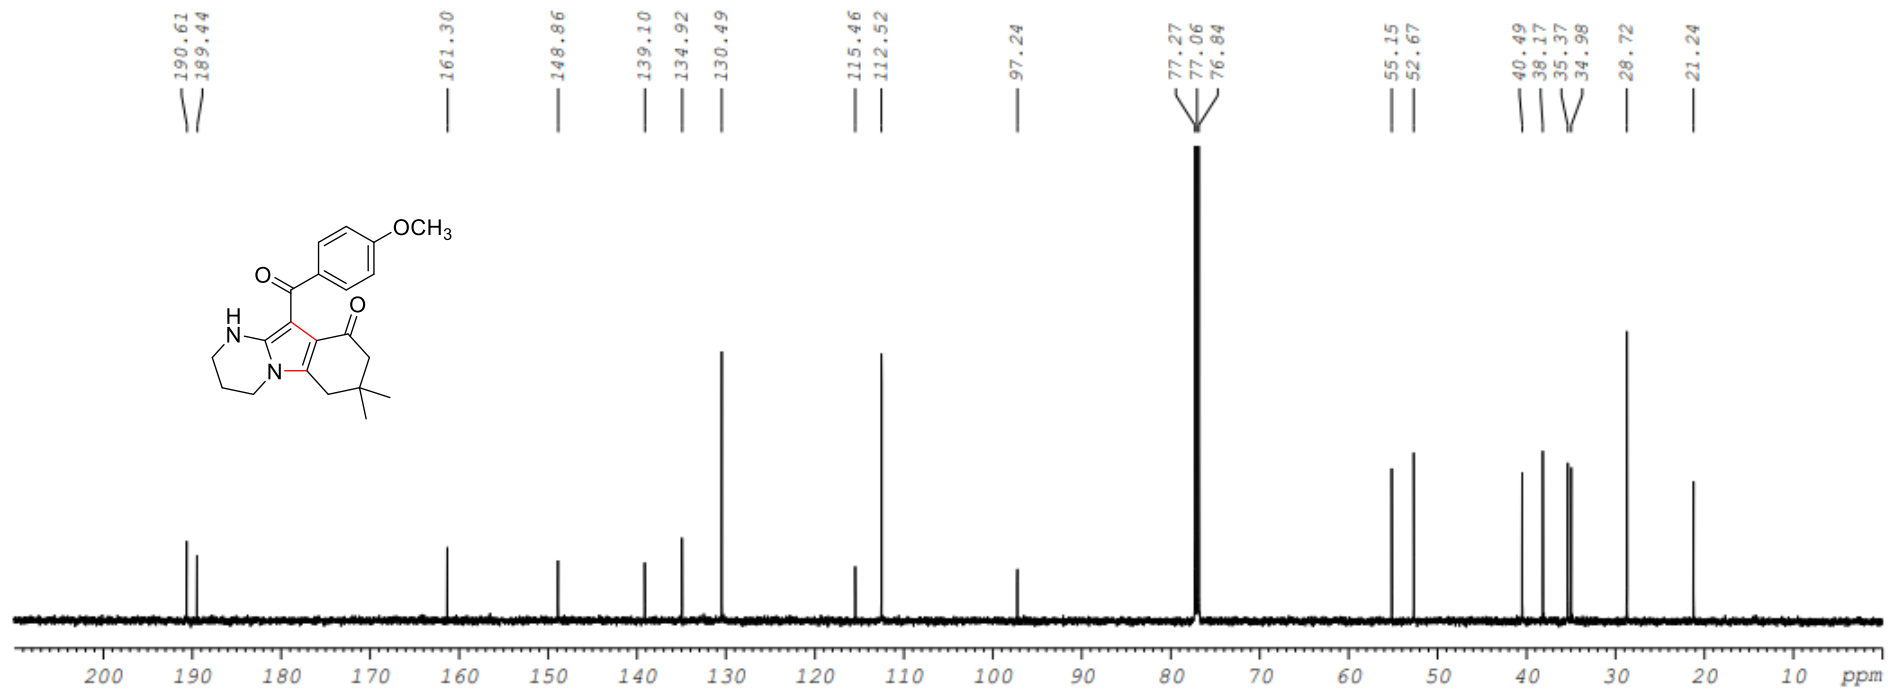

Figure S25.  $^{13}\text{C}$  NMR (150 MHz,  $\text{CDCl}_3-d_6$ ) spectra of compound **3j**

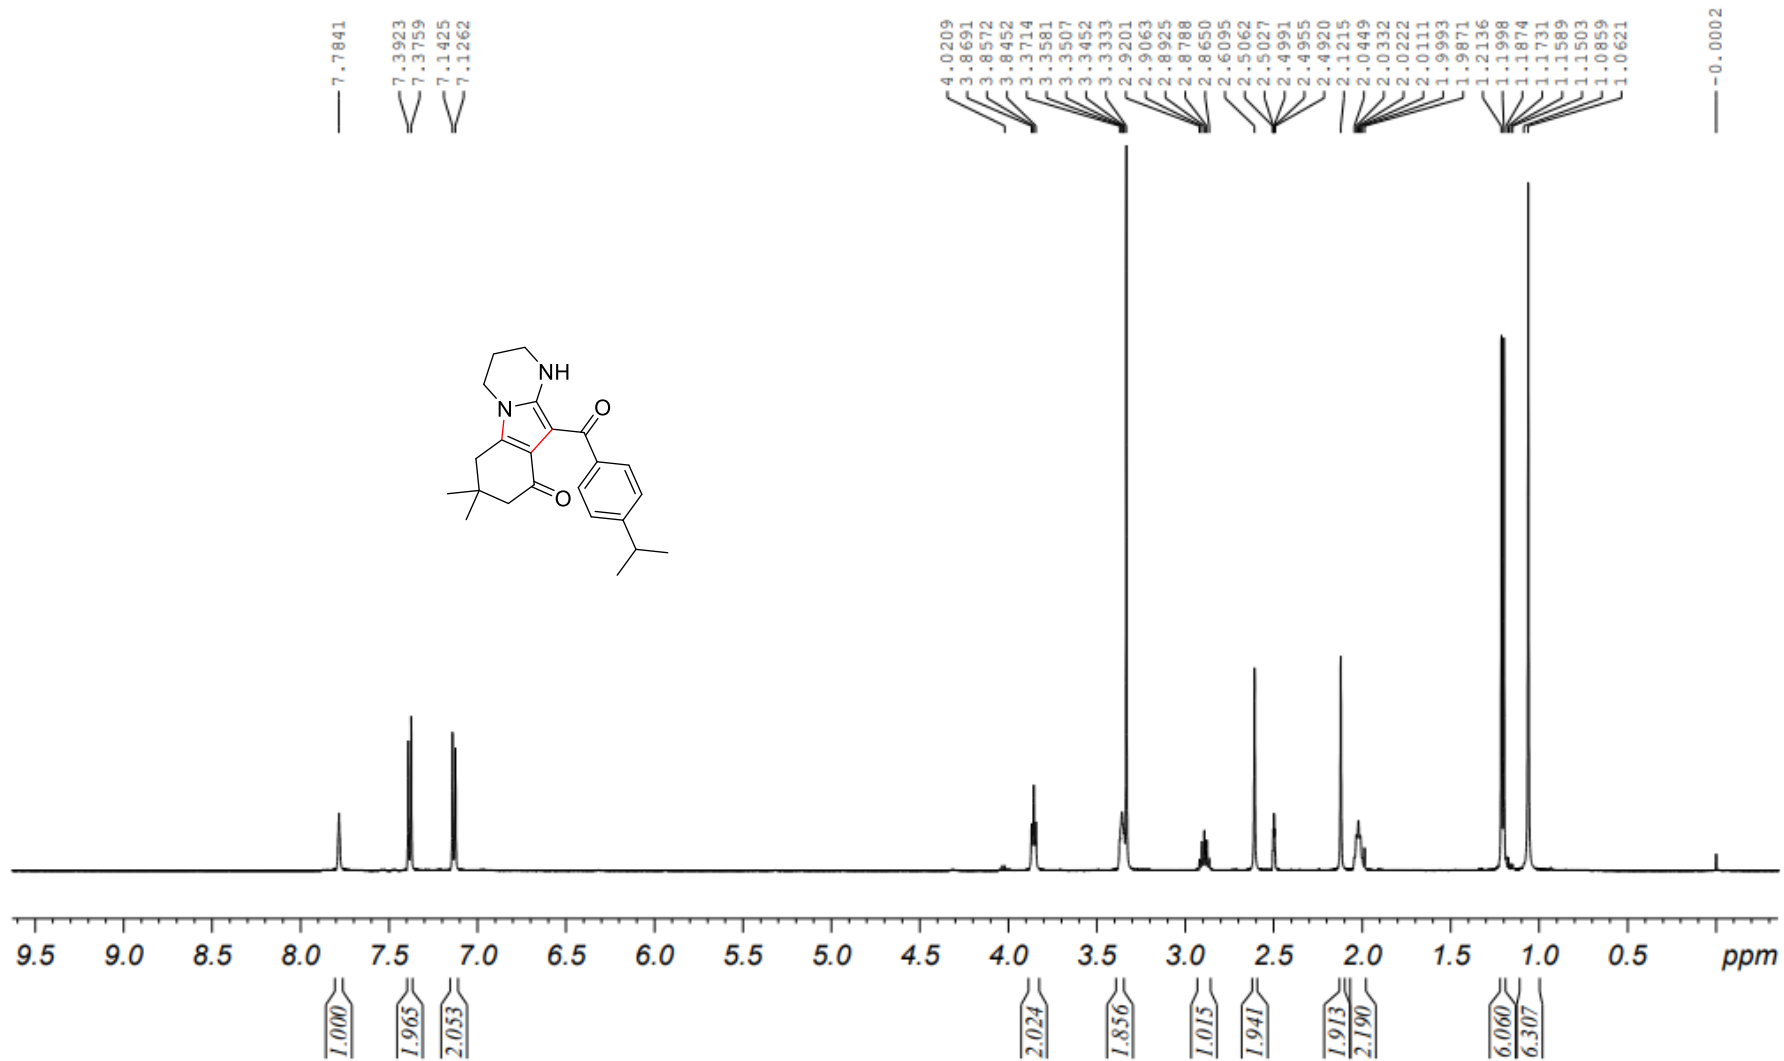

**Figure S26.** <sup>1</sup>H NMR (500 MHz, DMSO-*d*<sub>6</sub>) spectra of compound **3k**

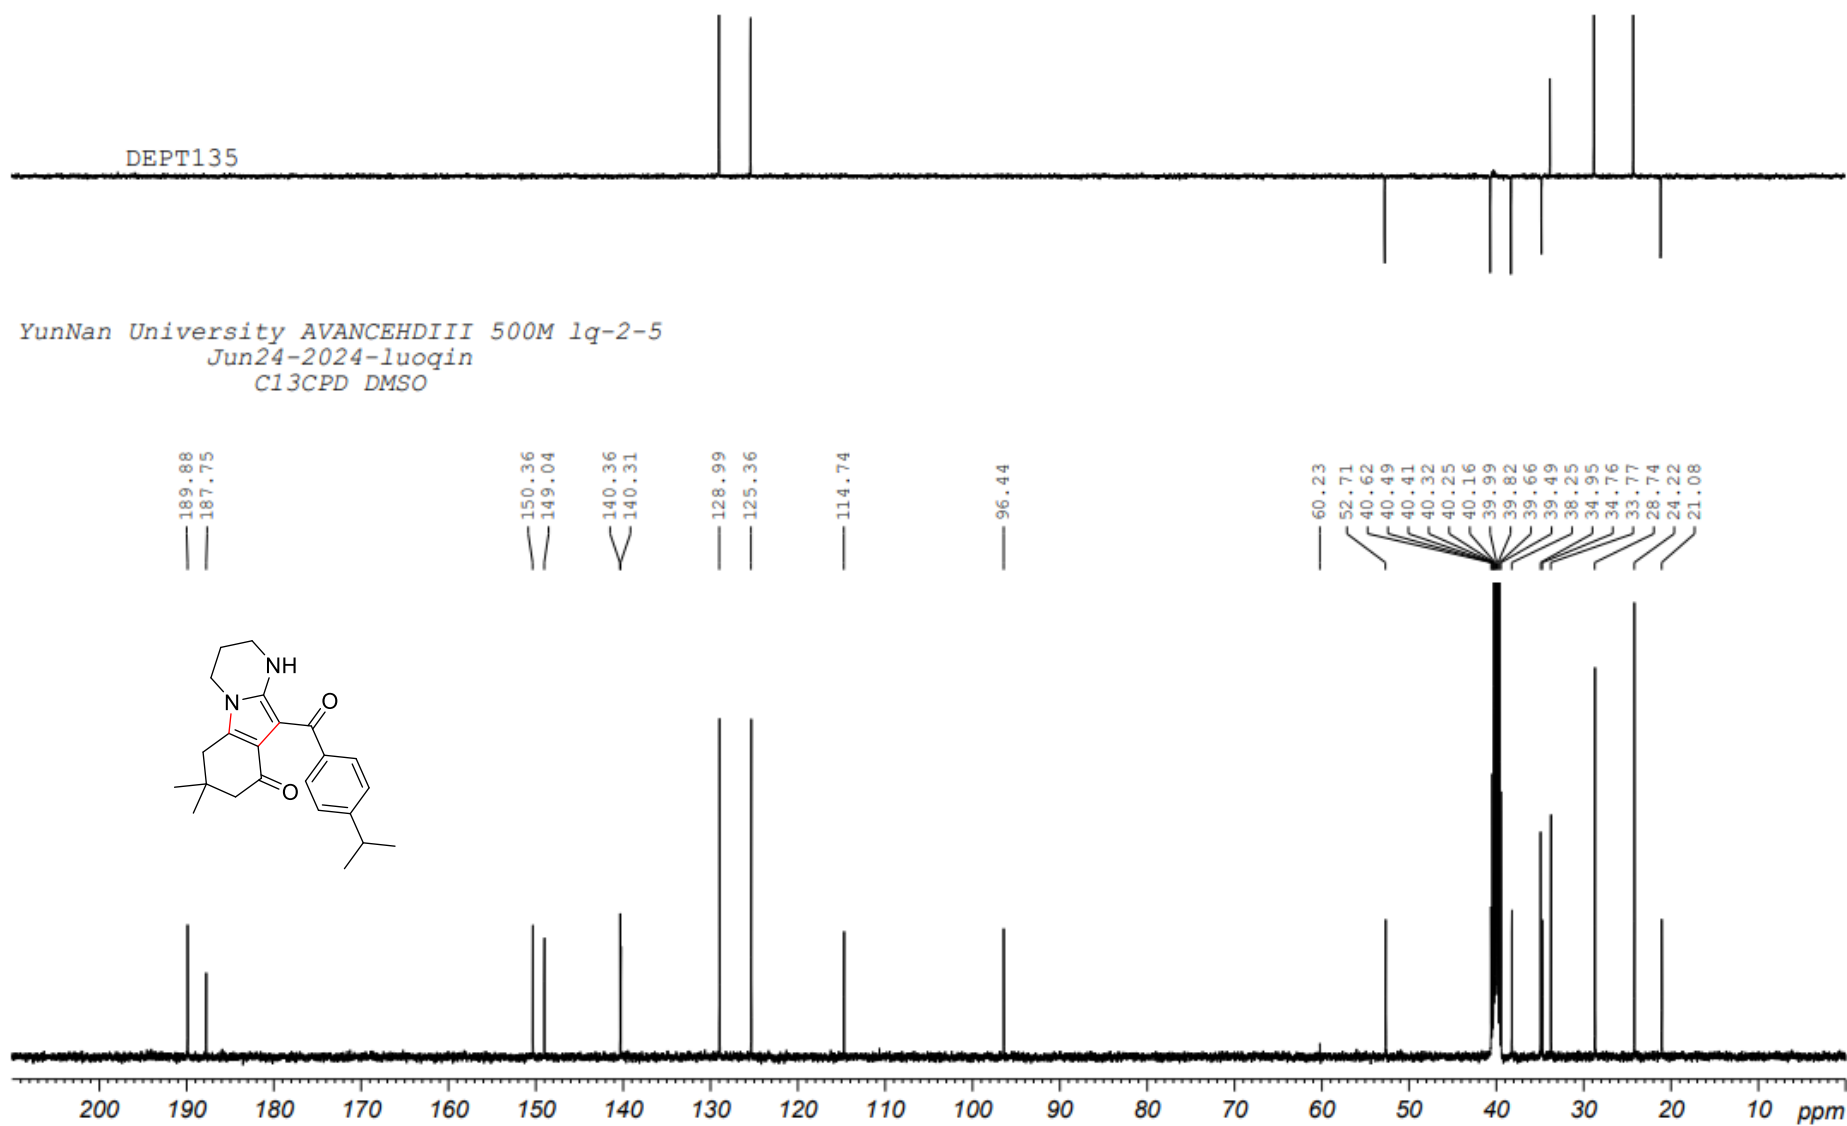

Figure S27. <sup>13</sup>C NMR (125 MHz, DMSO-*d*<sub>6</sub>) spectra of compound 3k



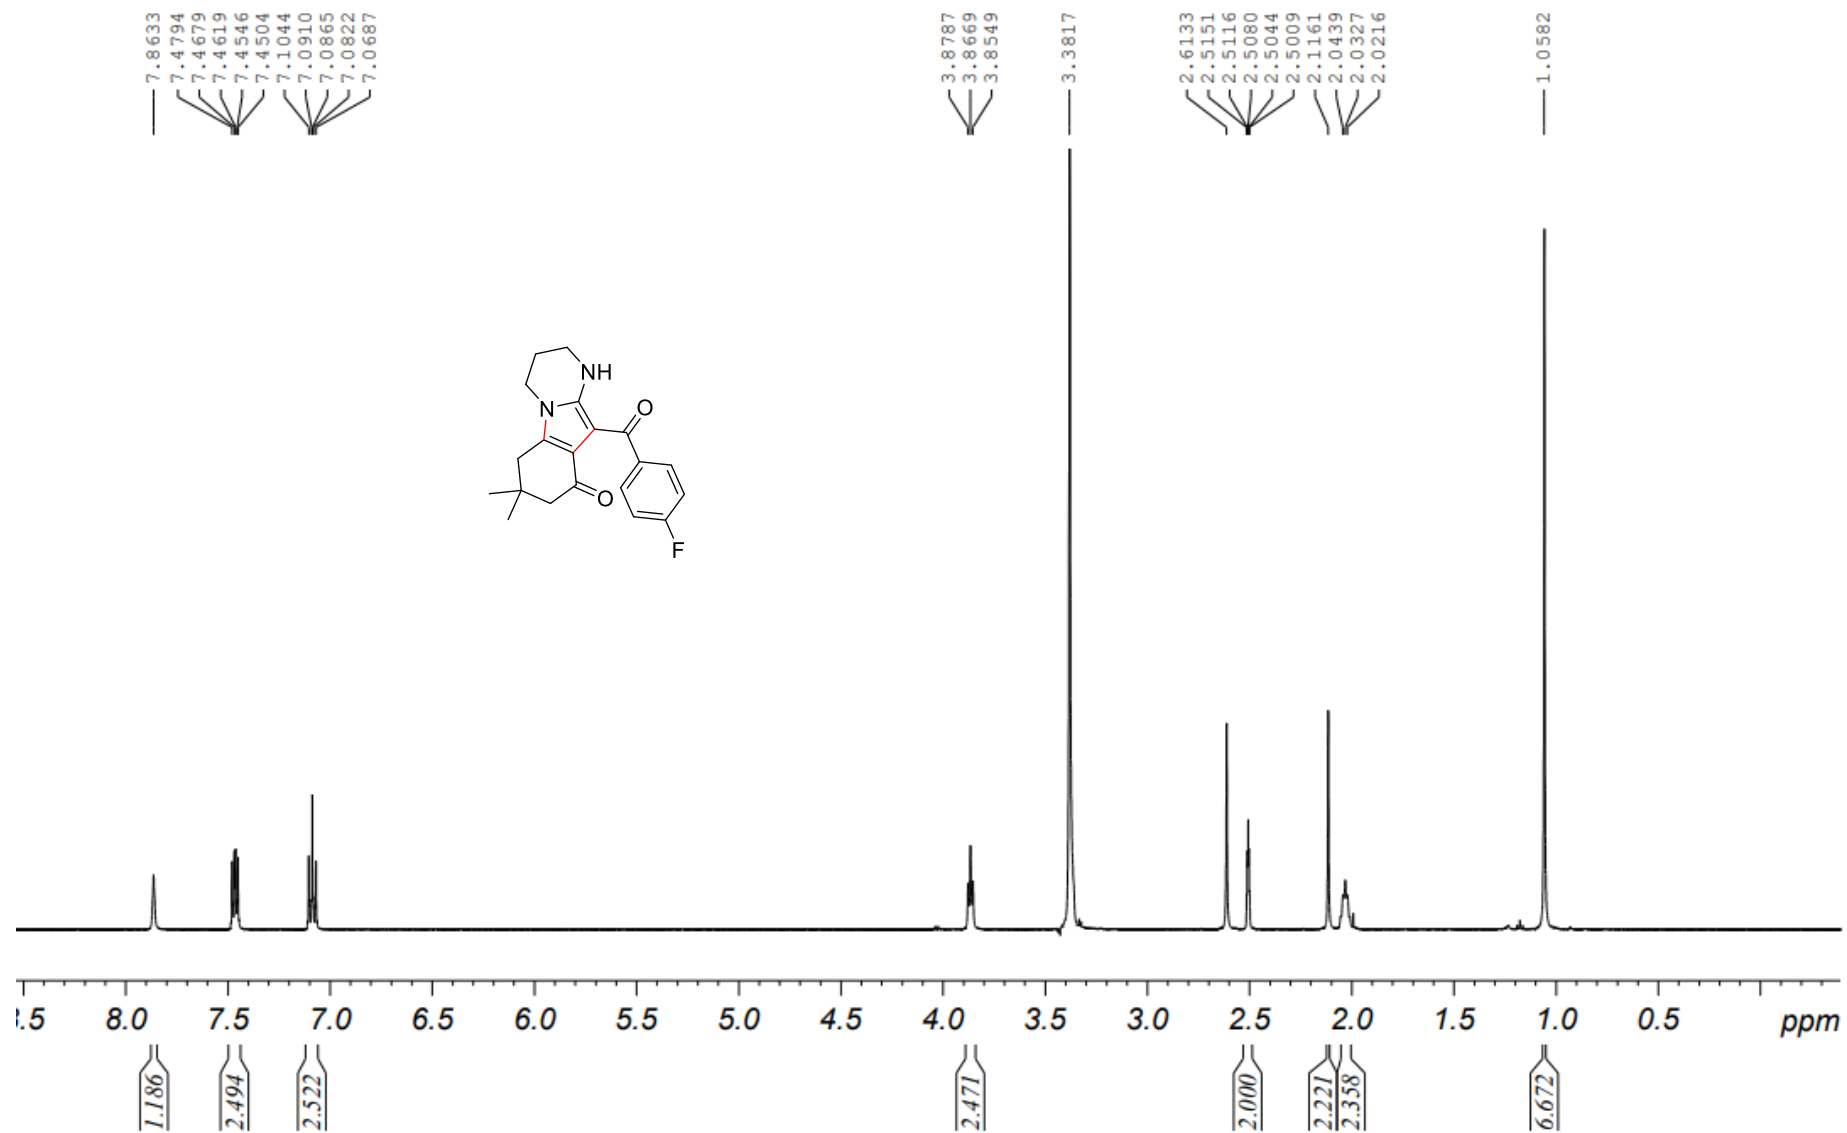

**Figure S28.**  $^1\text{H}$  NMR (500 MHz, DMSO- $d_6$ ) spectra of compound **31**

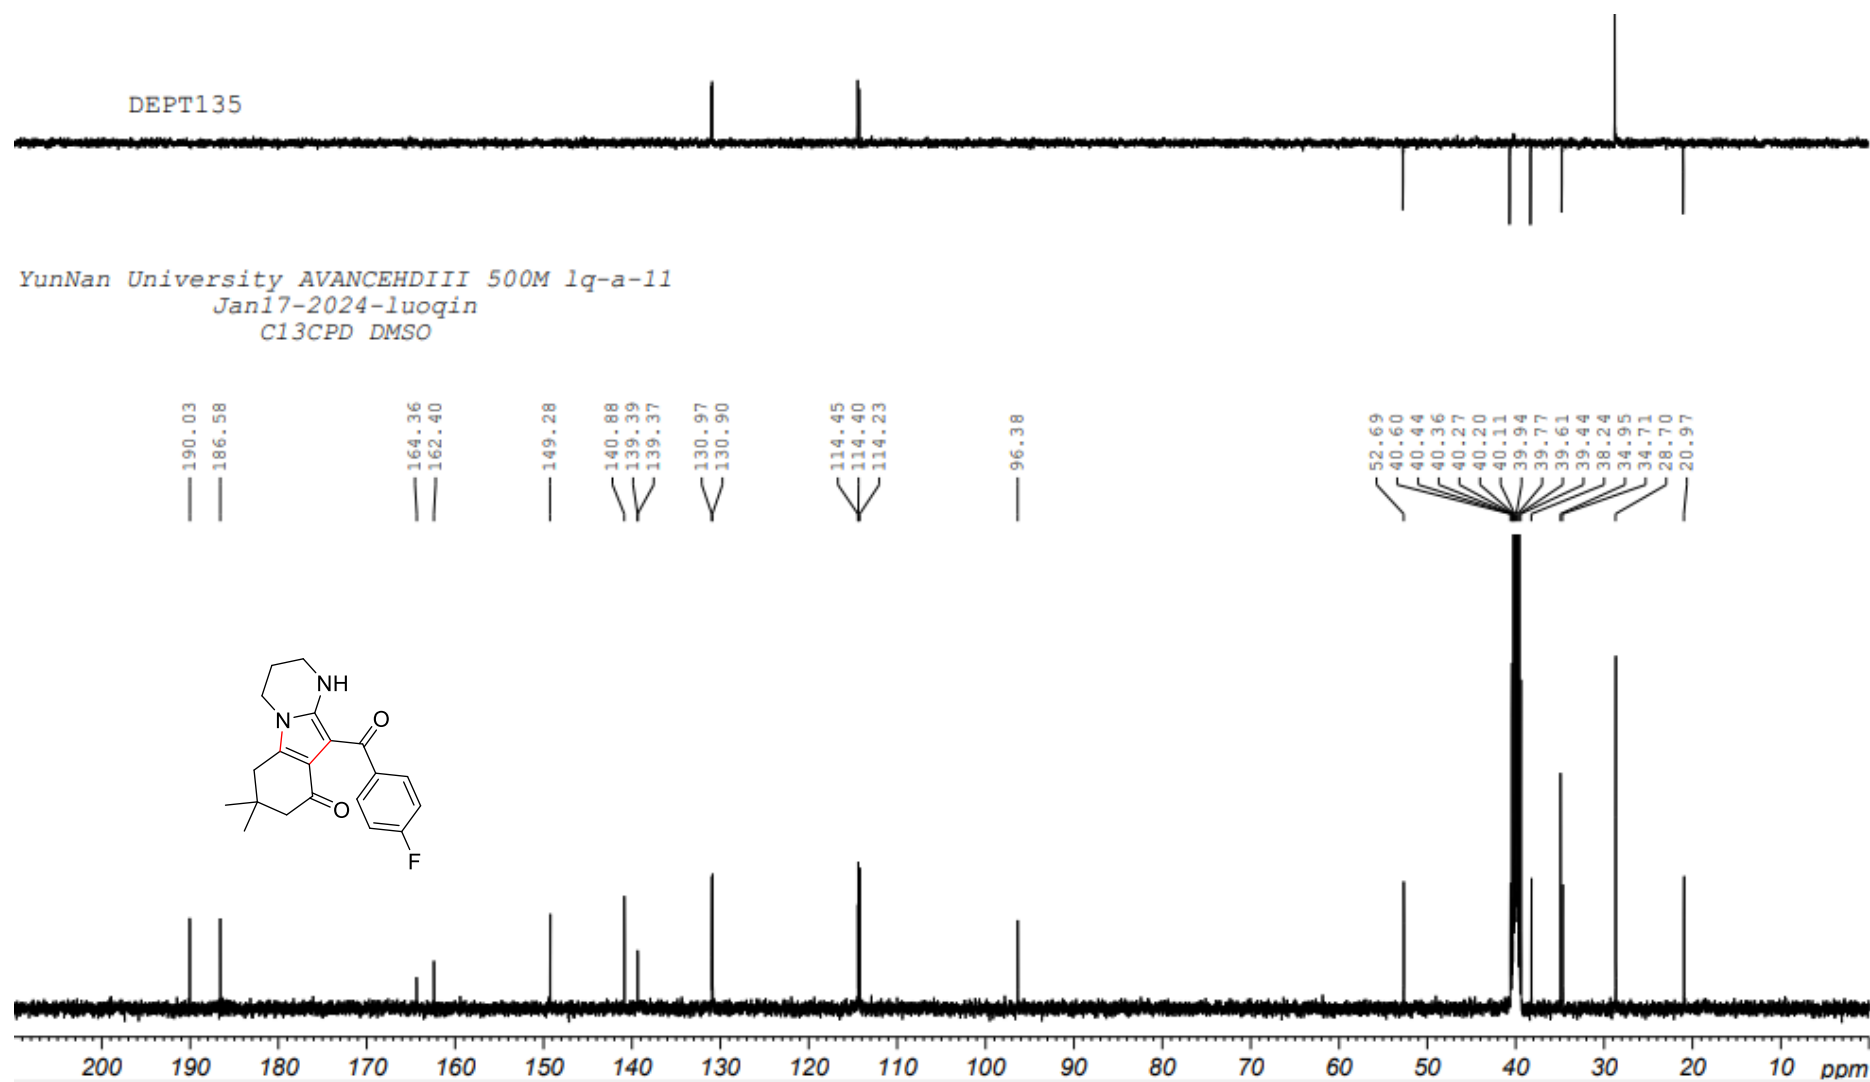

Figure S29. <sup>13</sup>C NMR (125 MHz, DMSO-*d*<sub>6</sub>) spectra of compound 3I

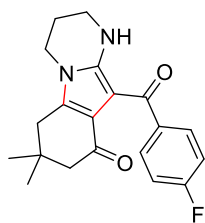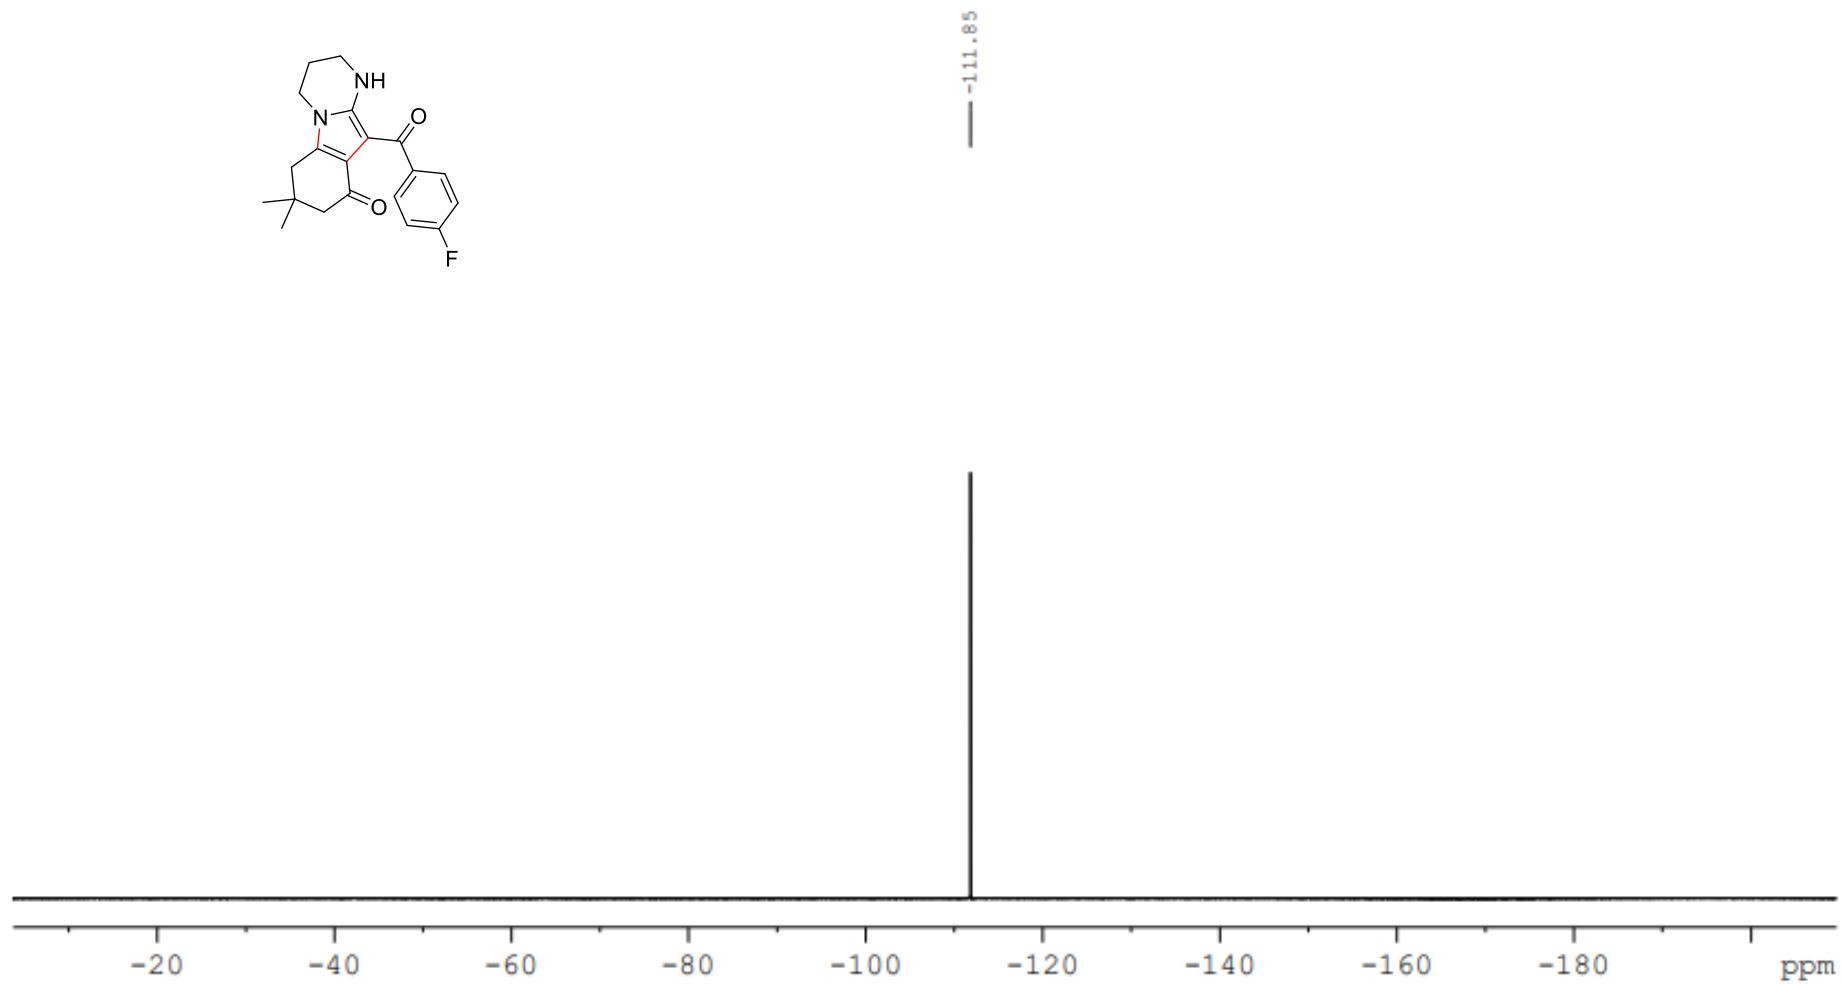

**Figure S30.**  $^{19}\text{F}$  NMR (475 MHz,  $\text{DMSO-}d_6$ ) spectra of compound **31**

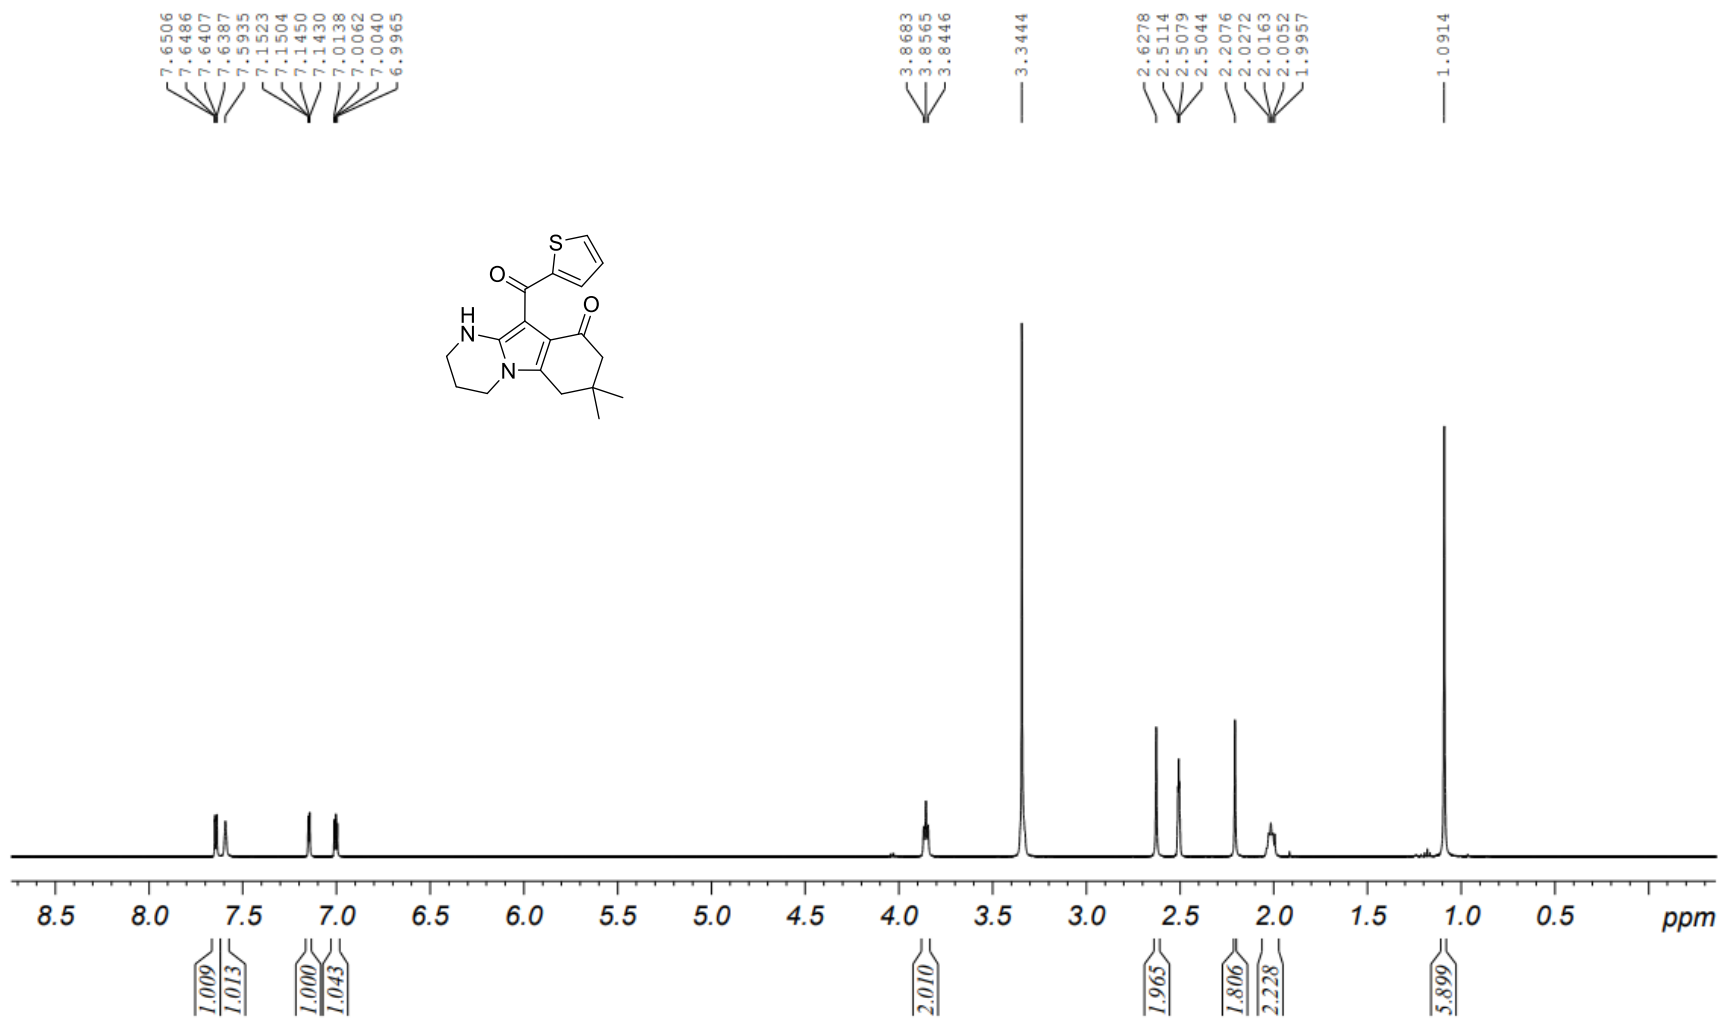

**Figure S31.**  $^1\text{H}$  NMR (500 MHz,  $\text{CDCl}_3-d_6$ ) spectra of compound **3m**

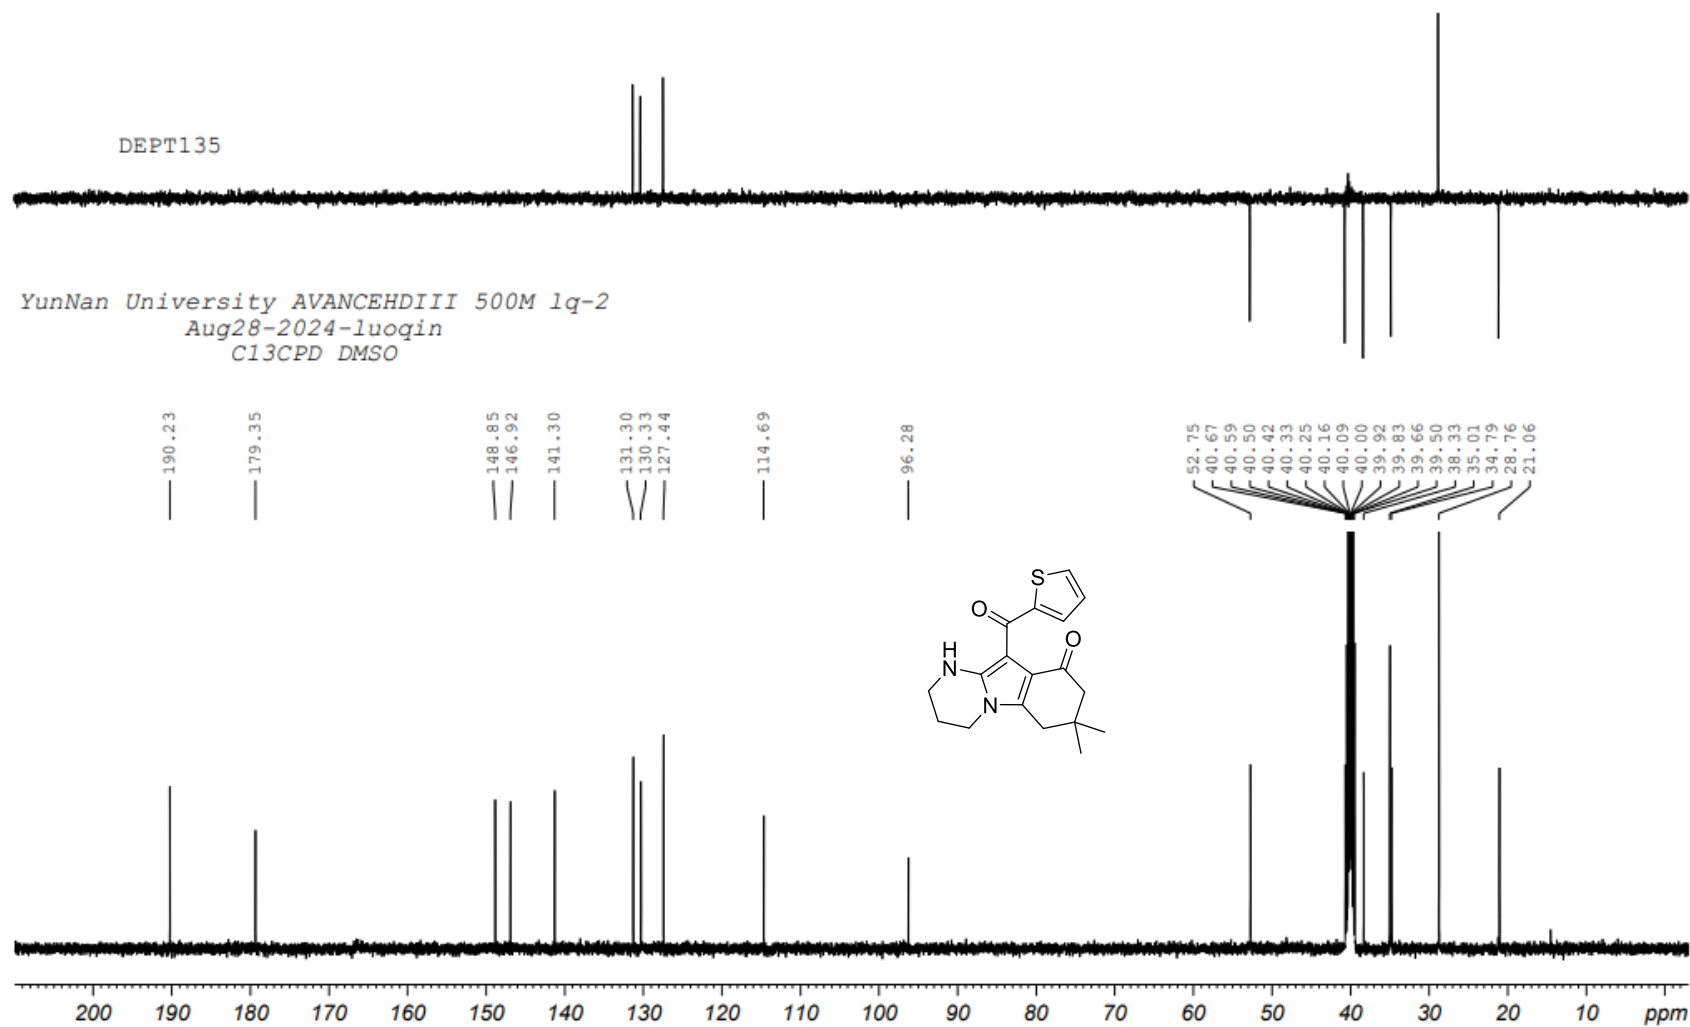

Figure S32.  $^{13}\text{C}$  NMR (125 MHz,  $\text{CDCl}_3-d_6$ ) spectra of compound **3m**

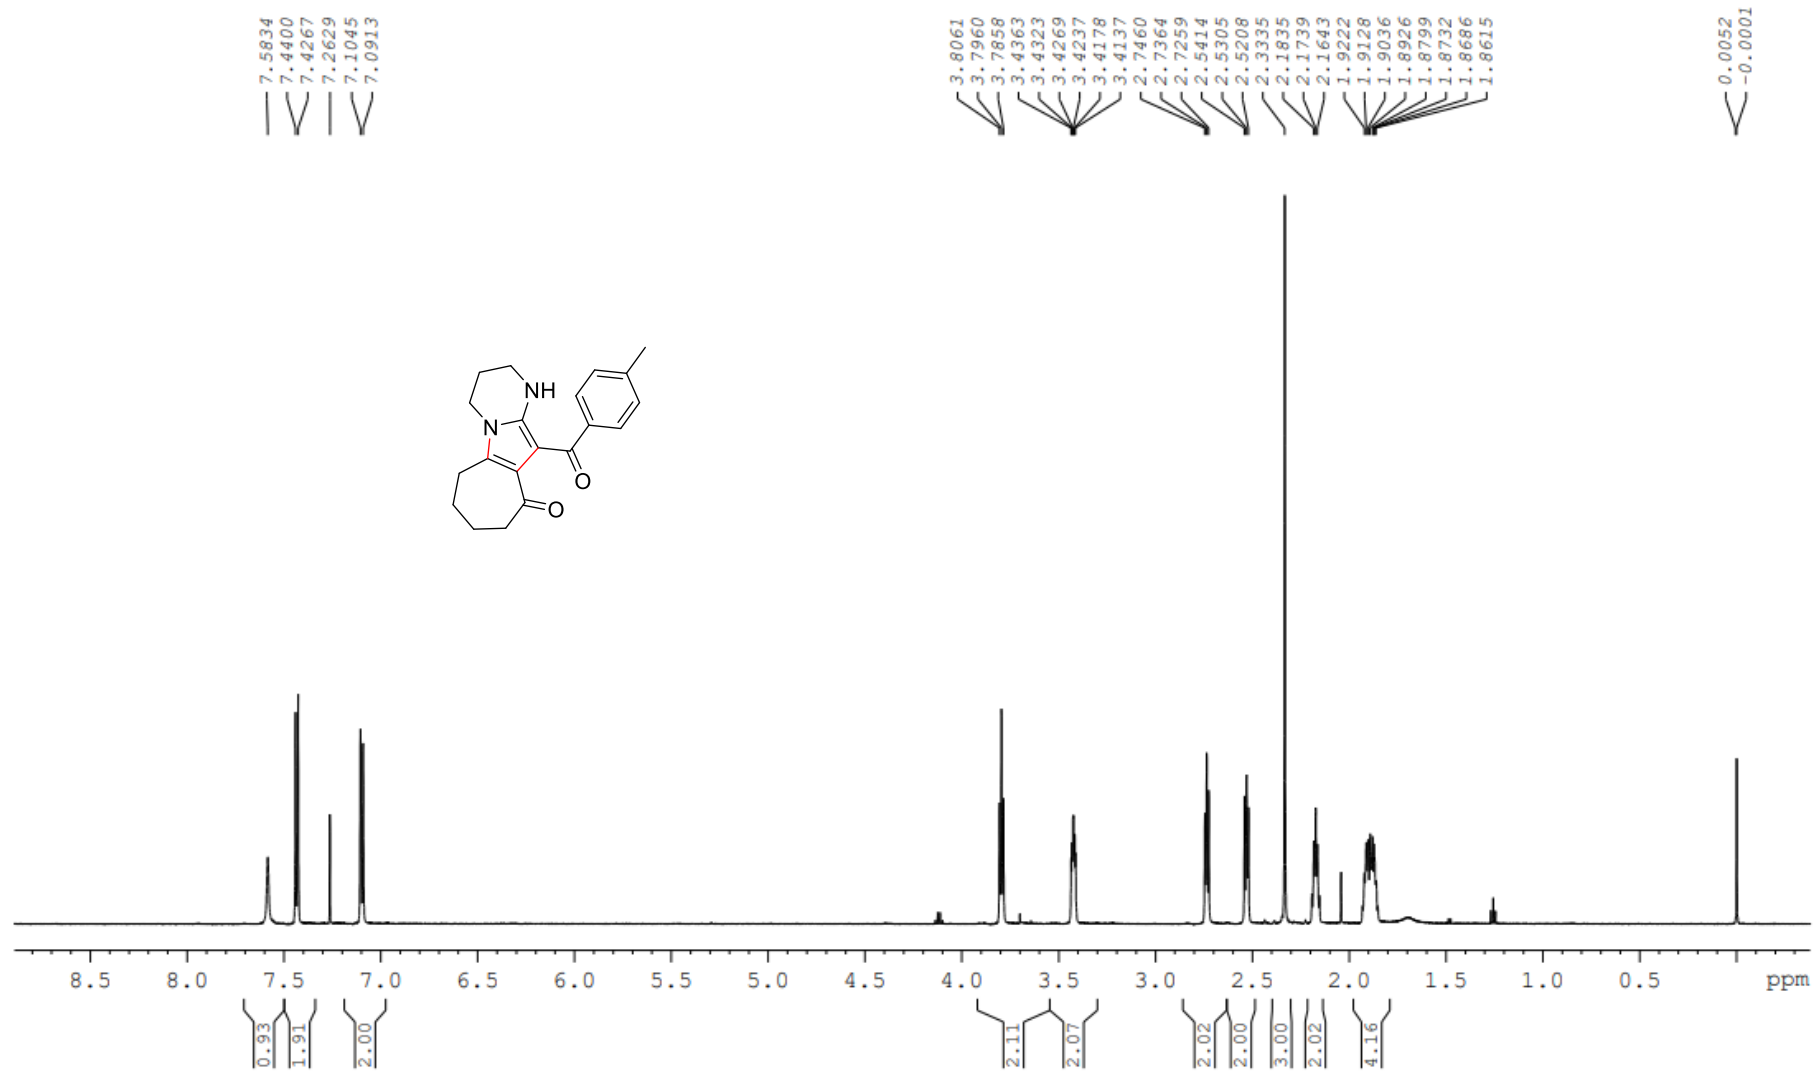

**Figure S33.**  $^1\text{H NMR}$  (600 MHz,  $\text{CDCl}_3-d_6$ ) spectra of compound **3n**

DEPT135

YUNNAN UNIVERSITY ASCEND AVIIIHD600 1q-2-21  
Mar28-2024-luoqin  
C13CPD CDC13

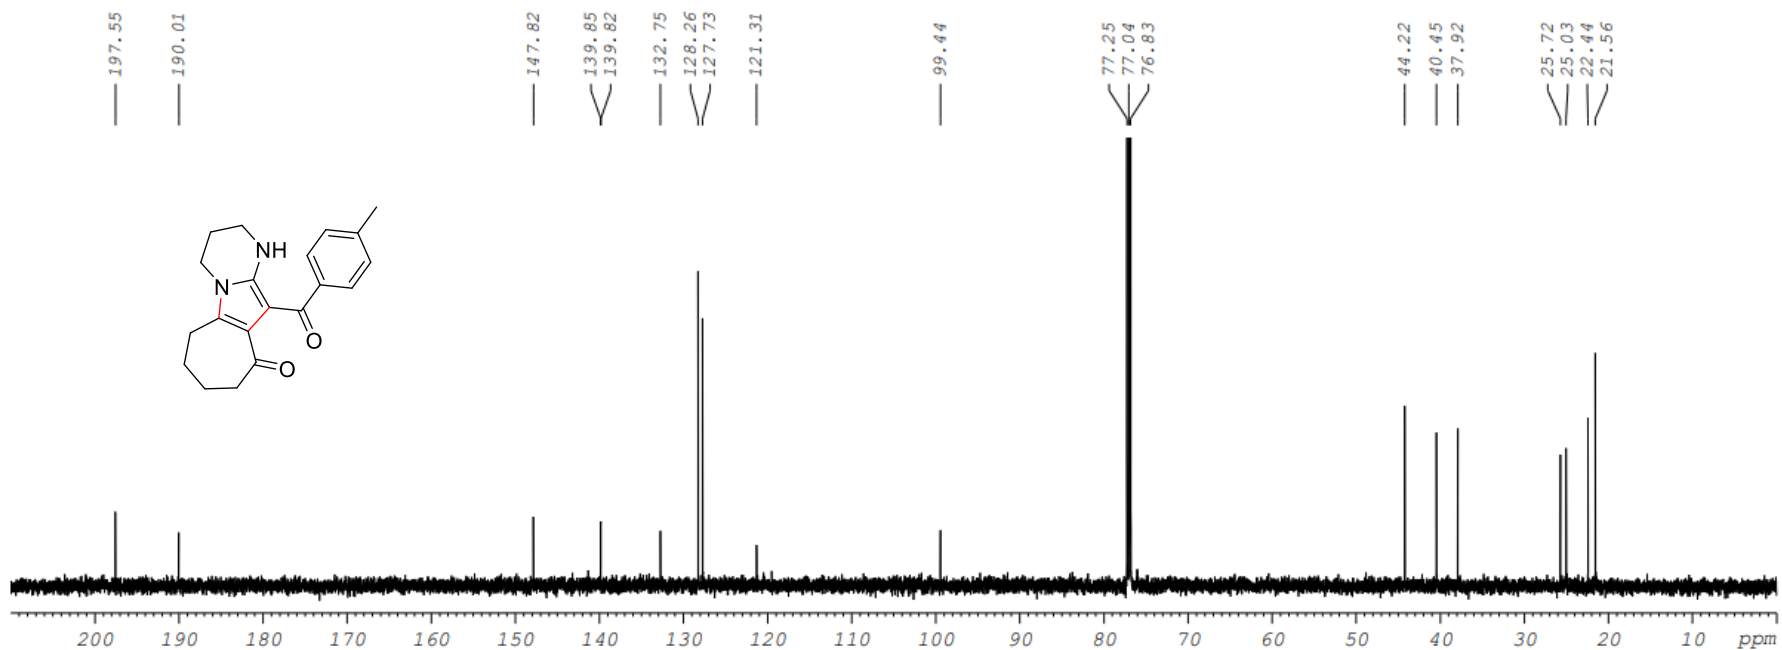

Figure S34.  $^{13}\text{C}$  NMR (150 MHz,  $\text{CDCl}_3-d_6$ ) spectra of compound **3n**

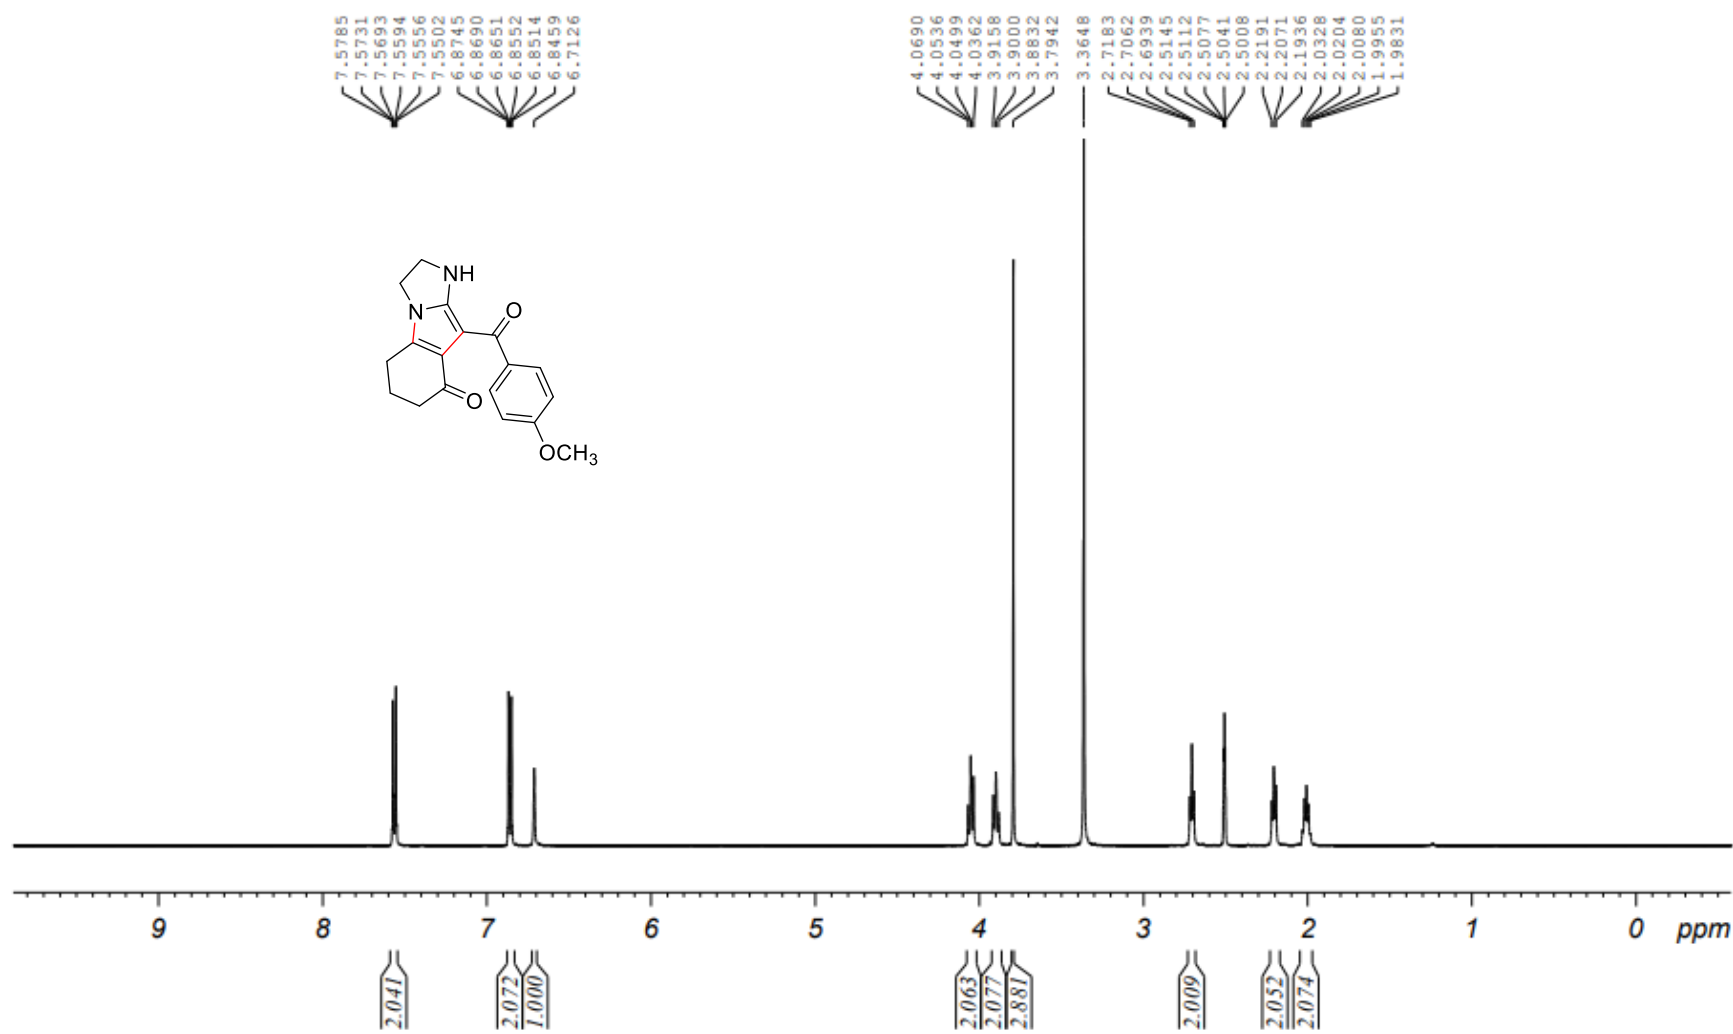

**Figure S35.** <sup>1</sup>H NMR (500 MHz, DMSO-*d*<sub>6</sub>) spectra of compound **3o**



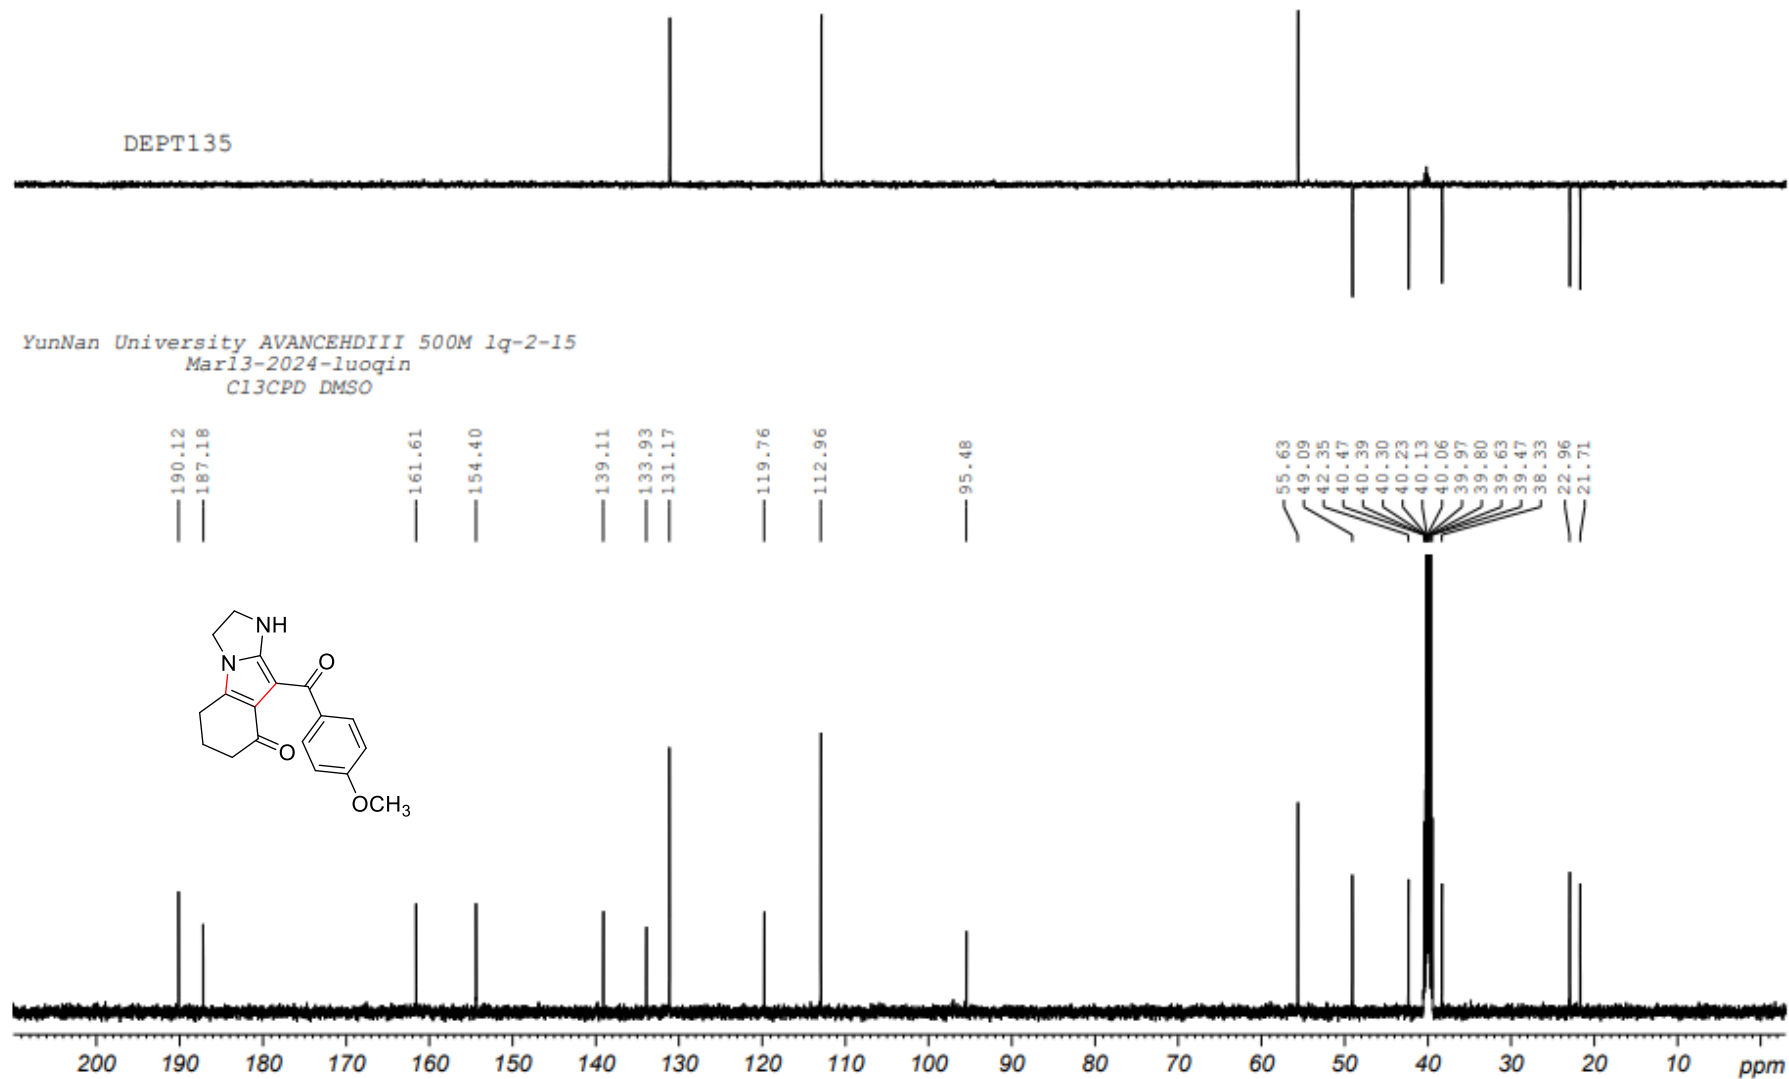

Figure S36.  $^{13}\text{C}$  NMR (125 MHz,  $\text{DMSO-}d_6$ ) spectra of compound **30**

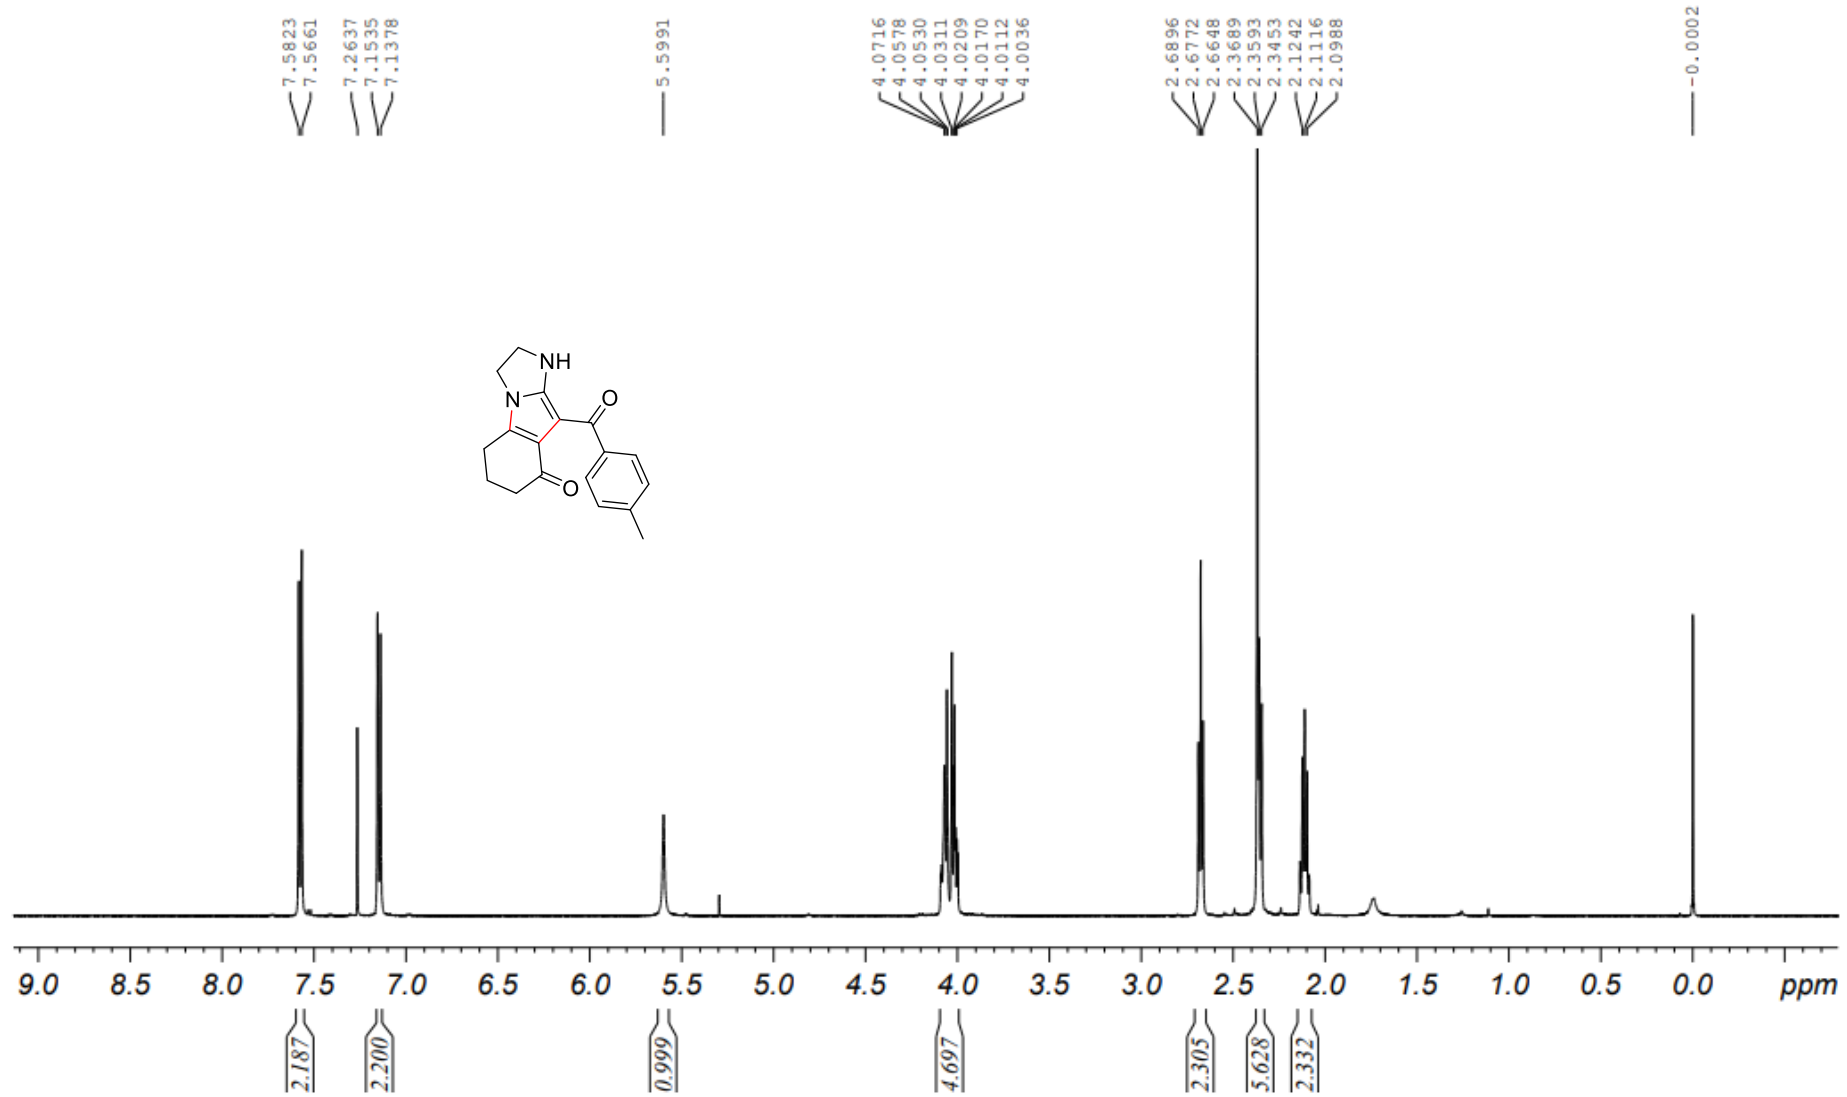

**Figure S37.**  $^1\text{H}$  NMR (500 MHz,  $\text{CDCl}_3-d_6$ ) spectra of compound **3p**

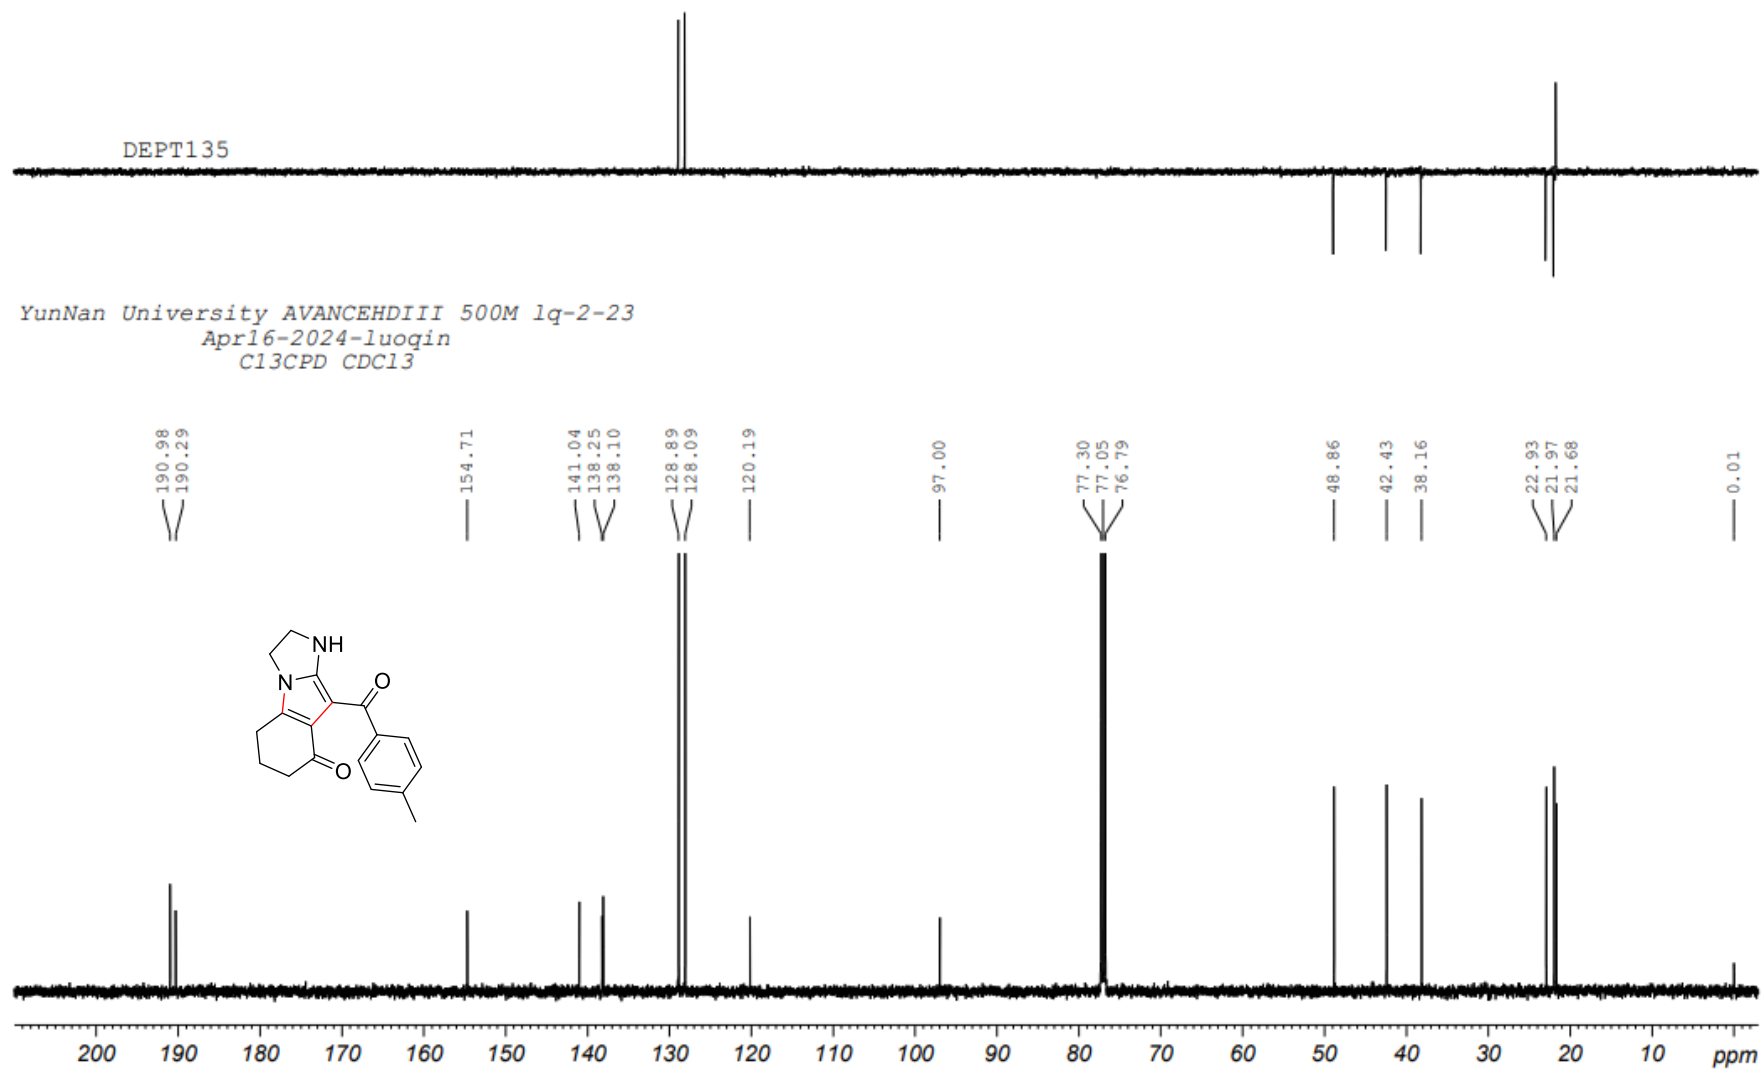

Figure S38. <sup>13</sup>C NMR (125 MHz, CDCl<sub>3</sub>-d<sub>6</sub>) spectra of compound **3p**

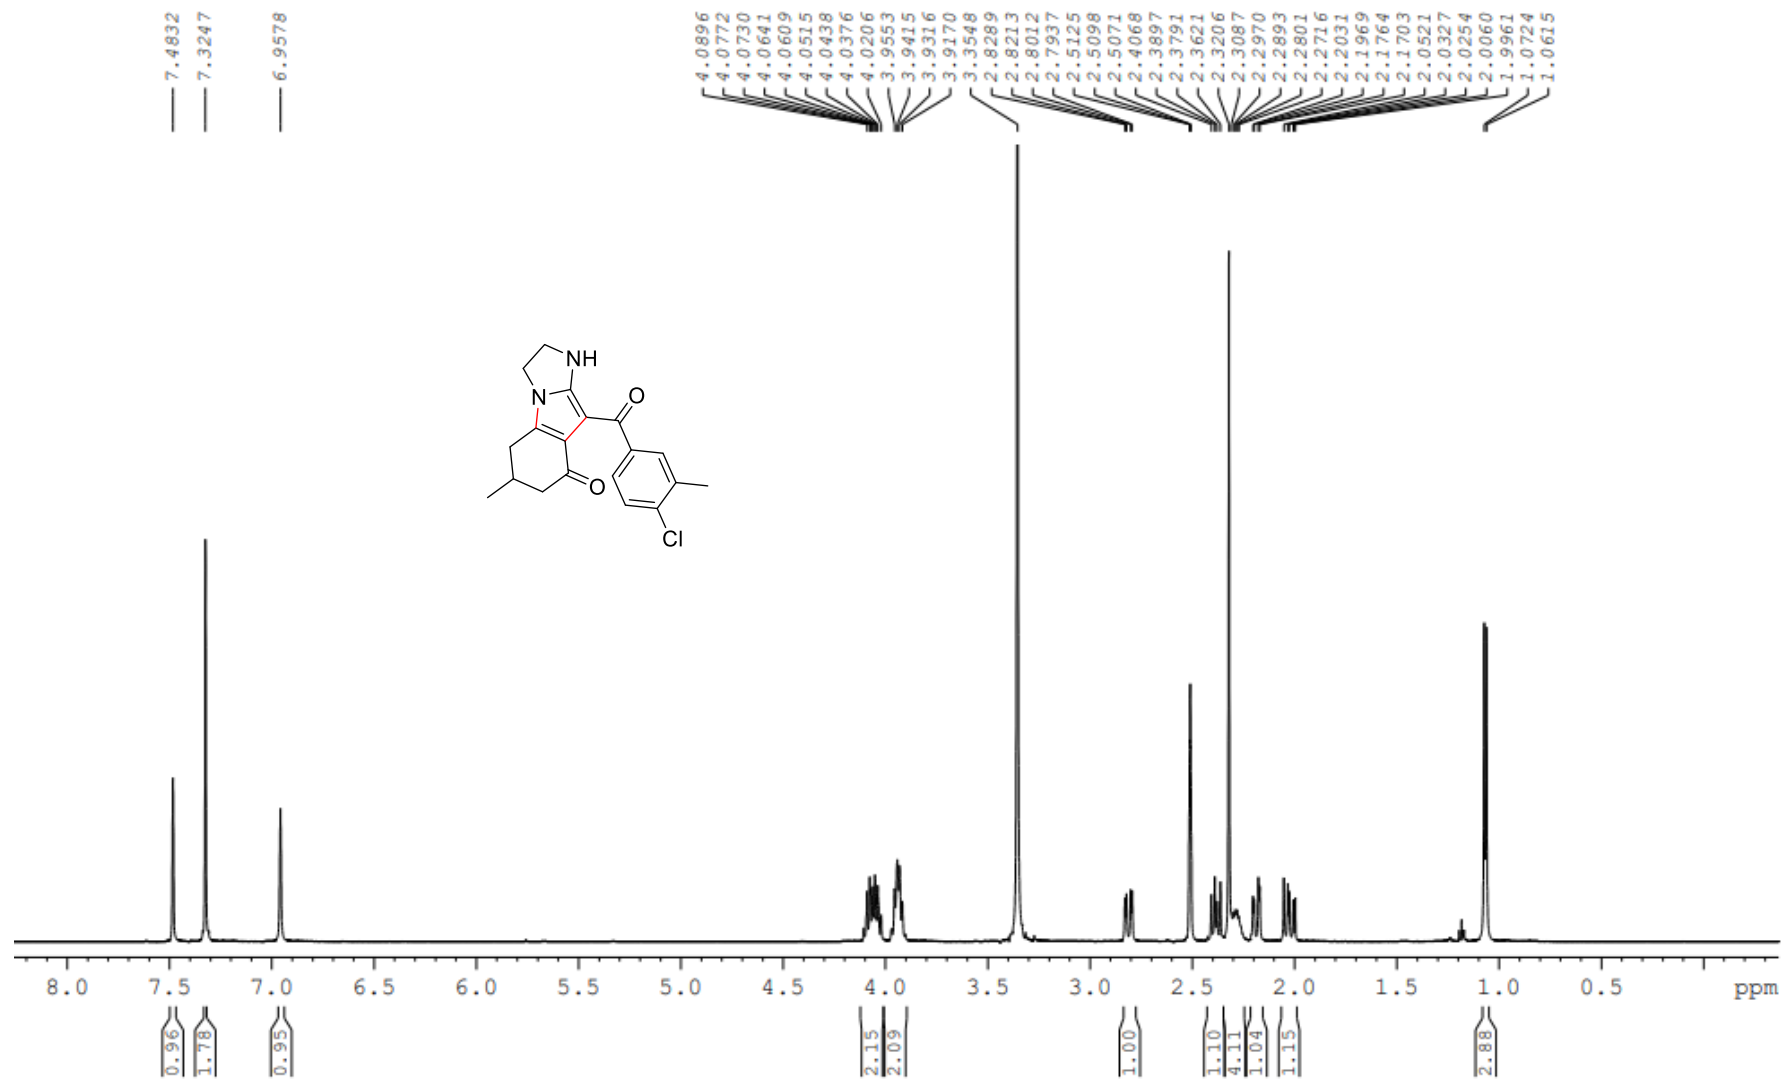

**Figure S39.** <sup>1</sup>H NMR (600 MHz, DMSO-*d*<sub>6</sub>) spectra of compound **3q**

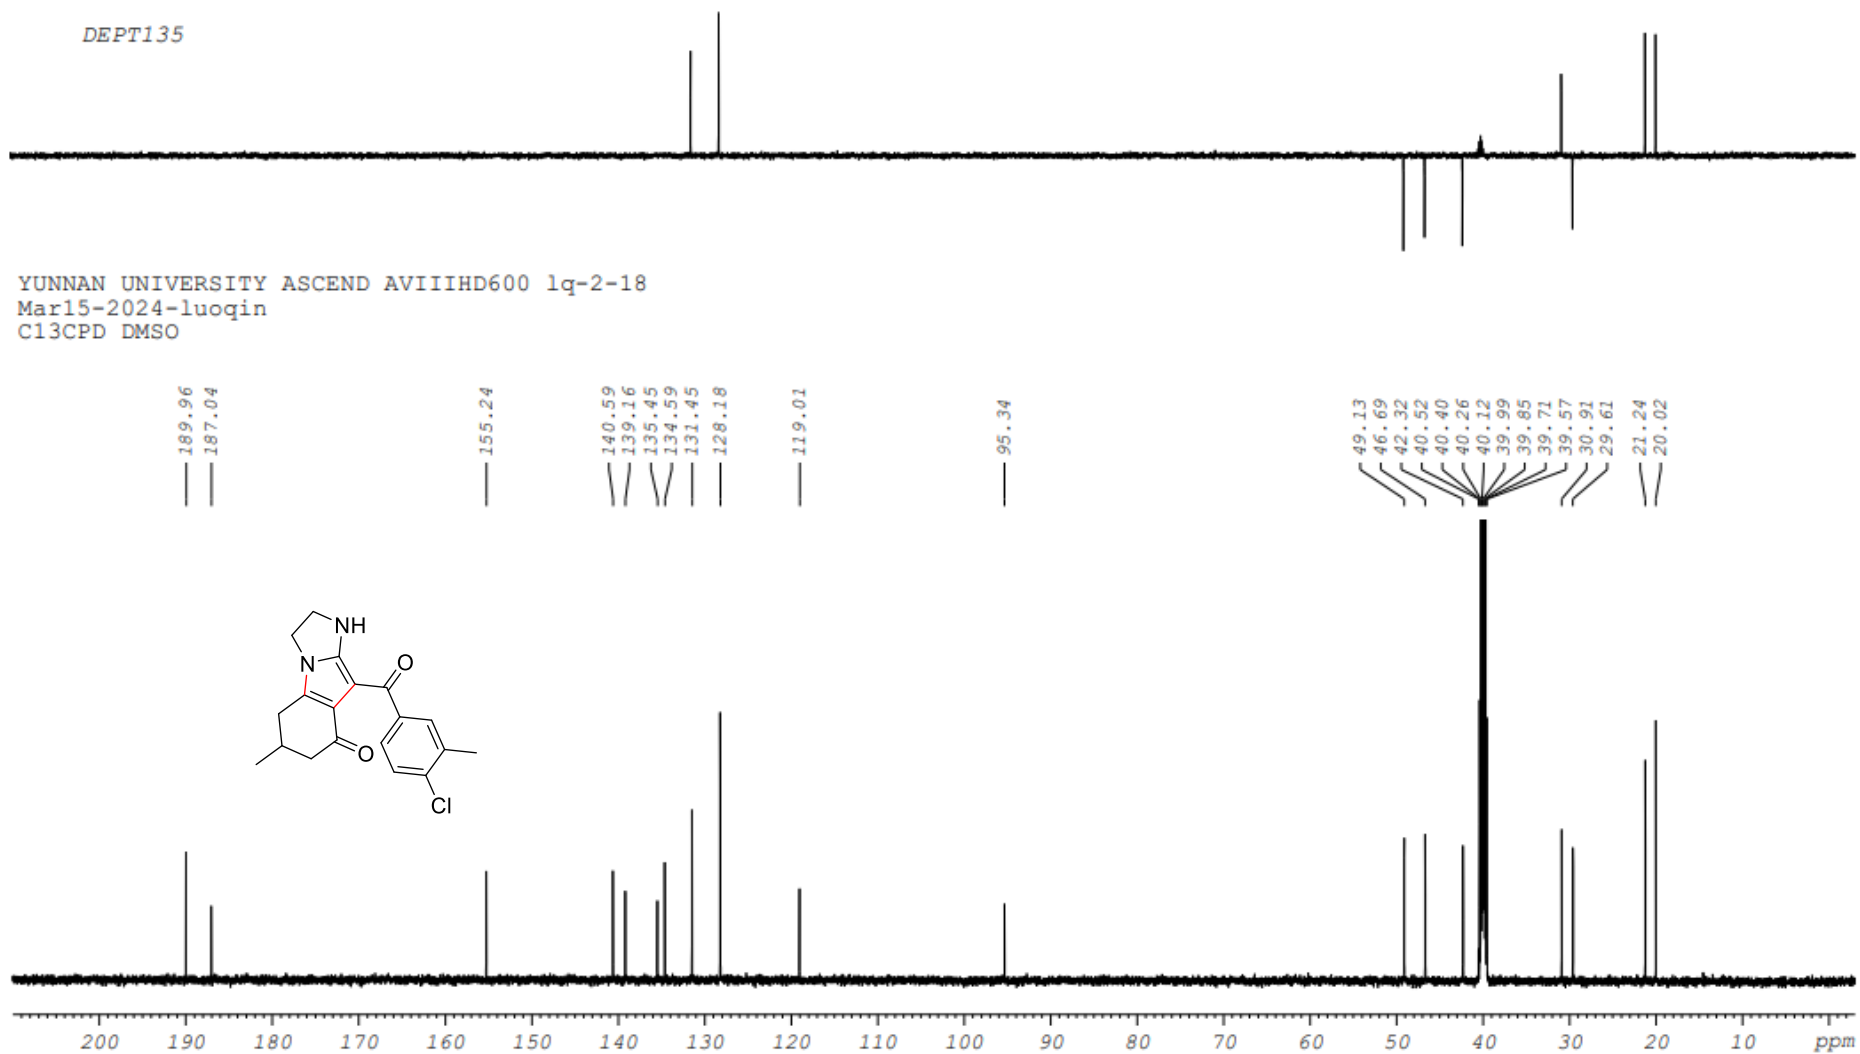

Figure S40.  $^{13}\text{C}$  NMR (150 MHz, DMSO- $d_6$ ) spectra of compound **3q**

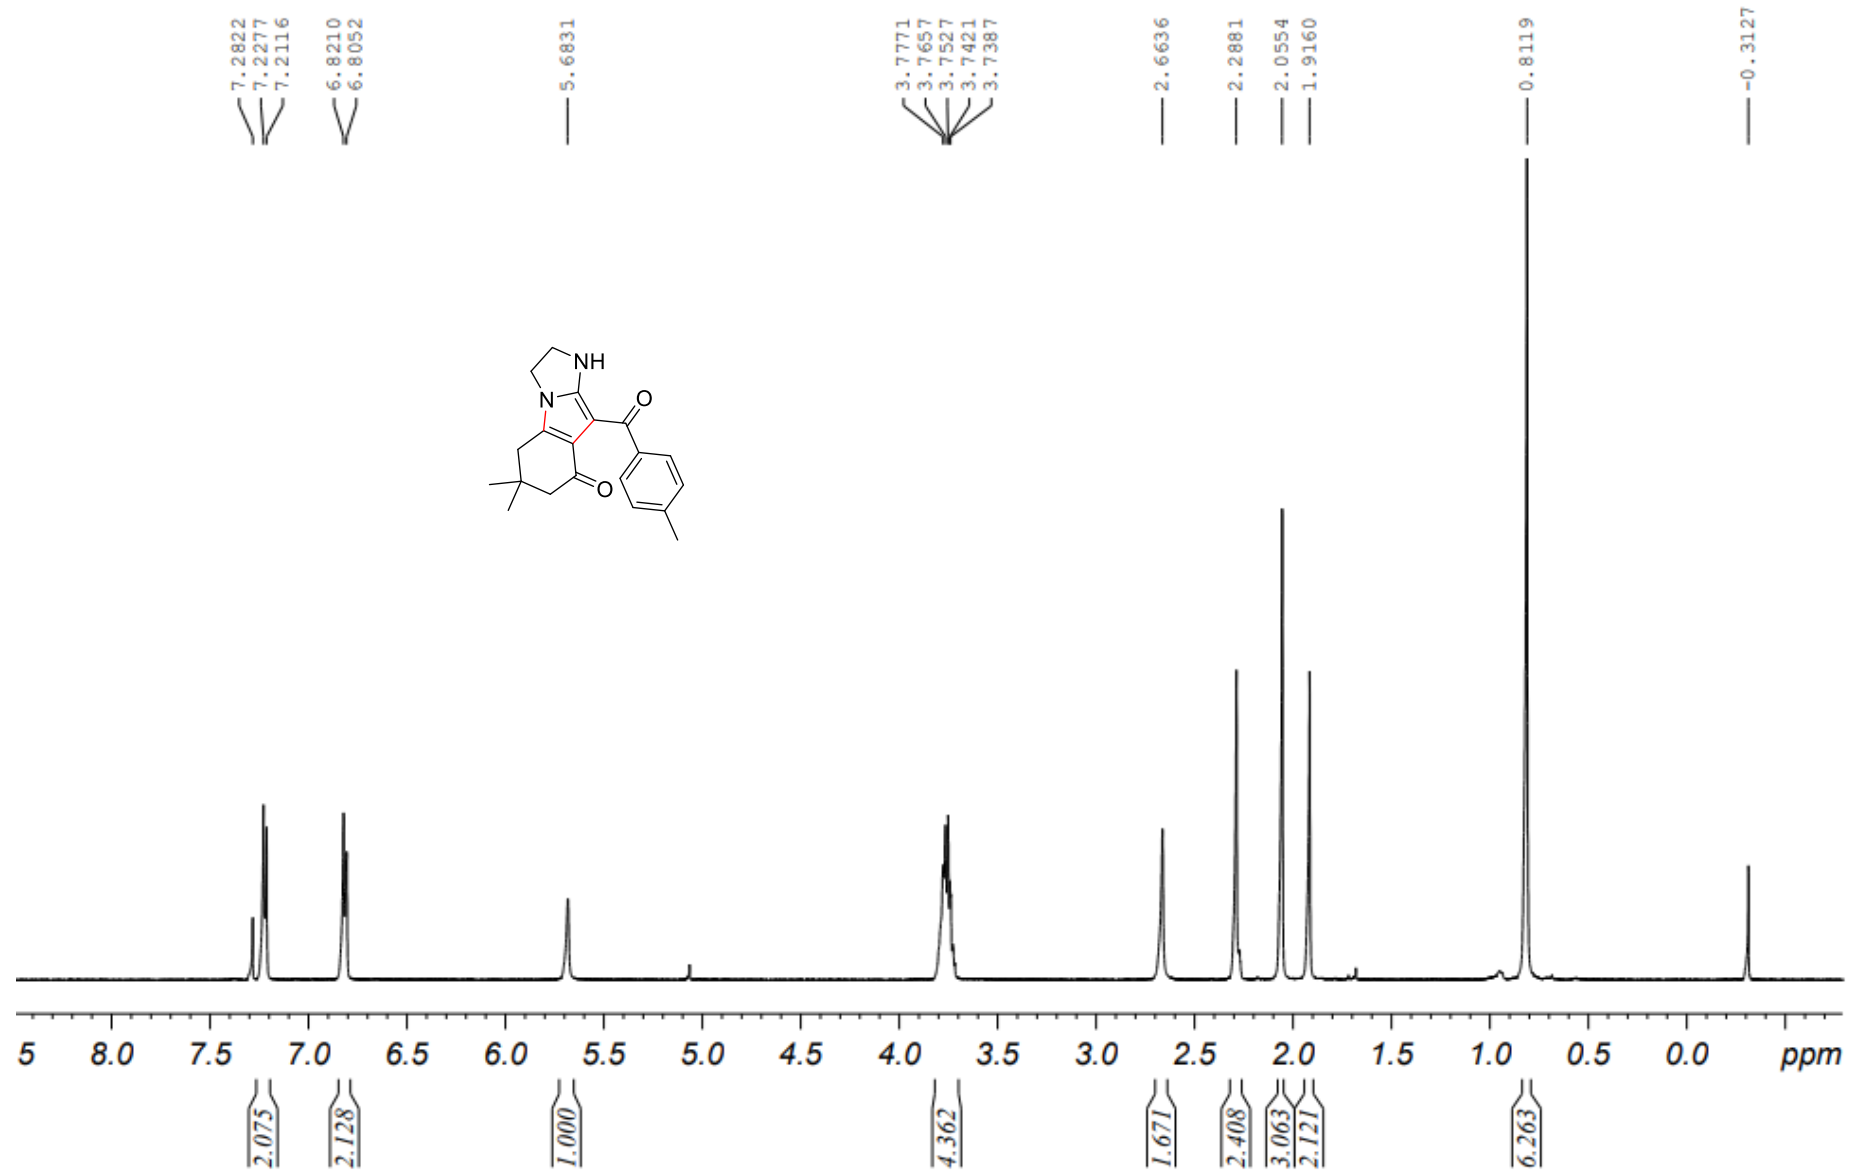

**Figure S41.**  $^1\text{H}$  NMR (500 MHz,  $\text{CDCl}_3-d_6$ ) spectra of compound **3r**

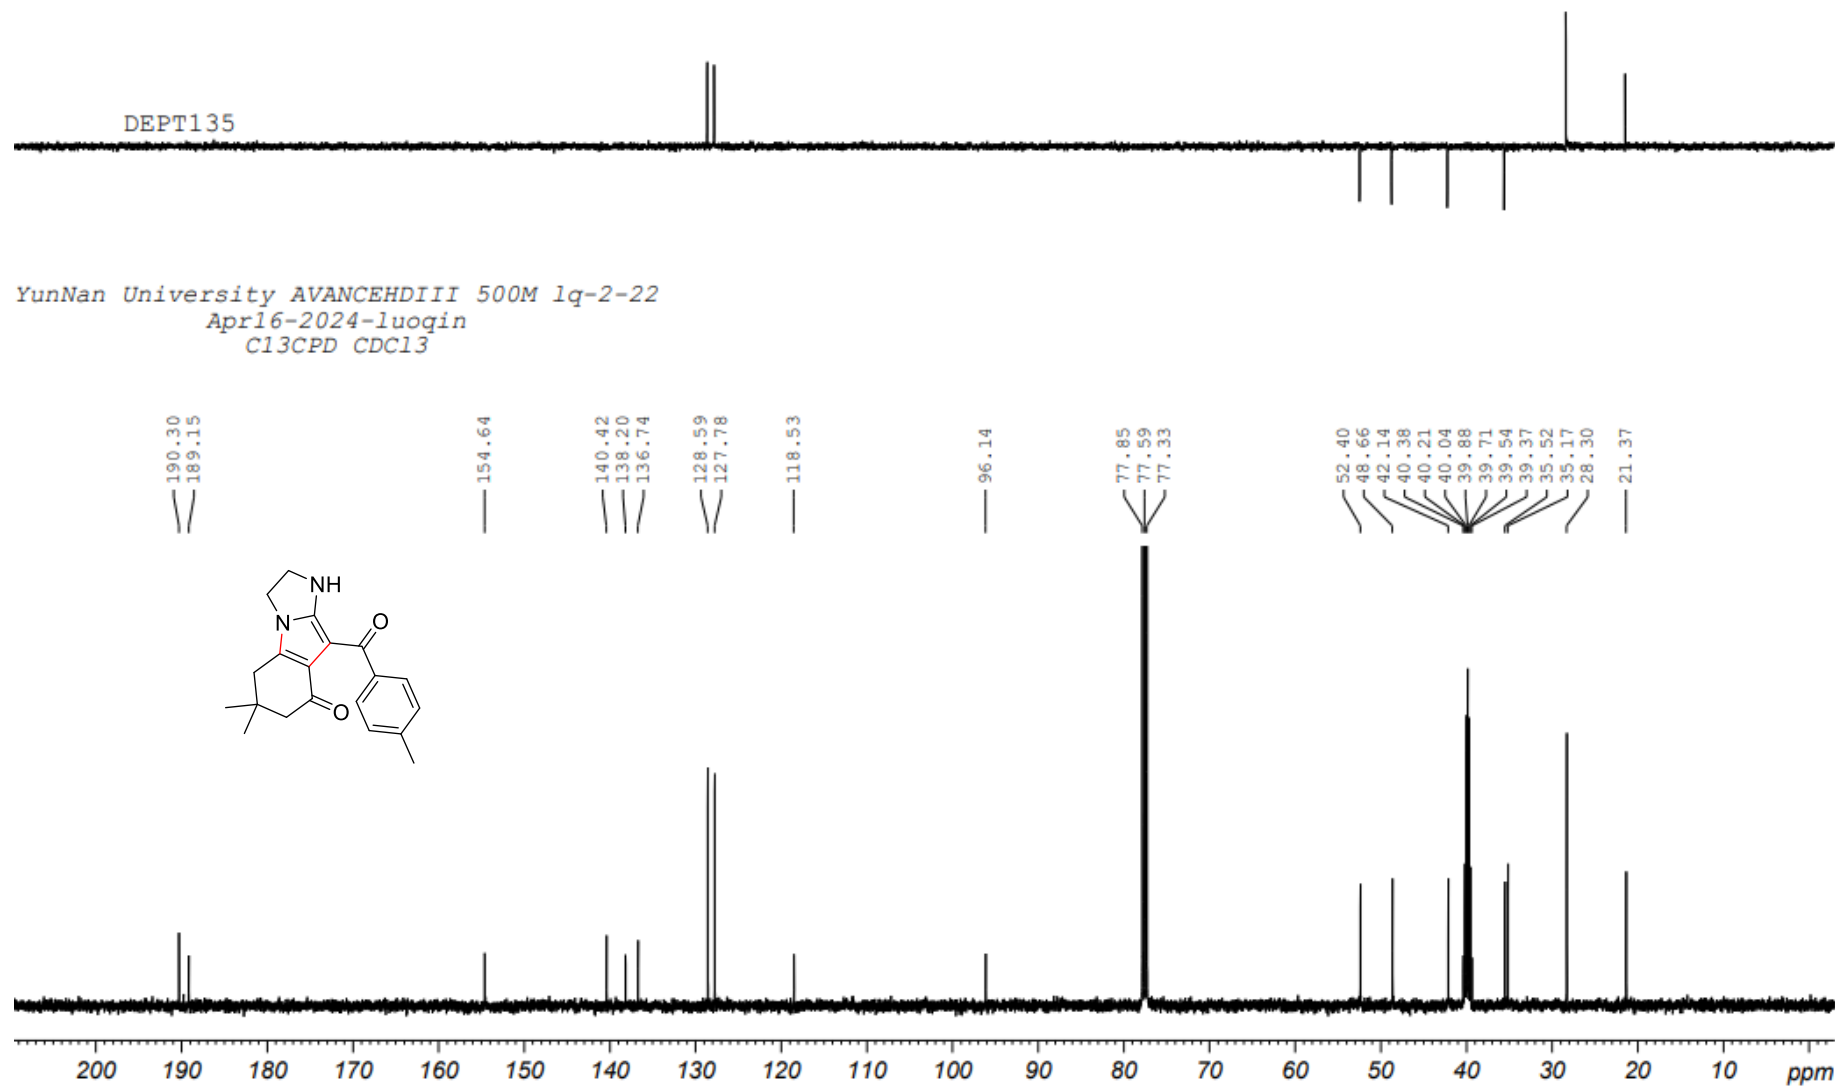

Figure S42.  $^{13}\text{C}$  NMR (125 MHz,  $\text{CDCl}_3-d_6$ ) spectra of compound **3r**

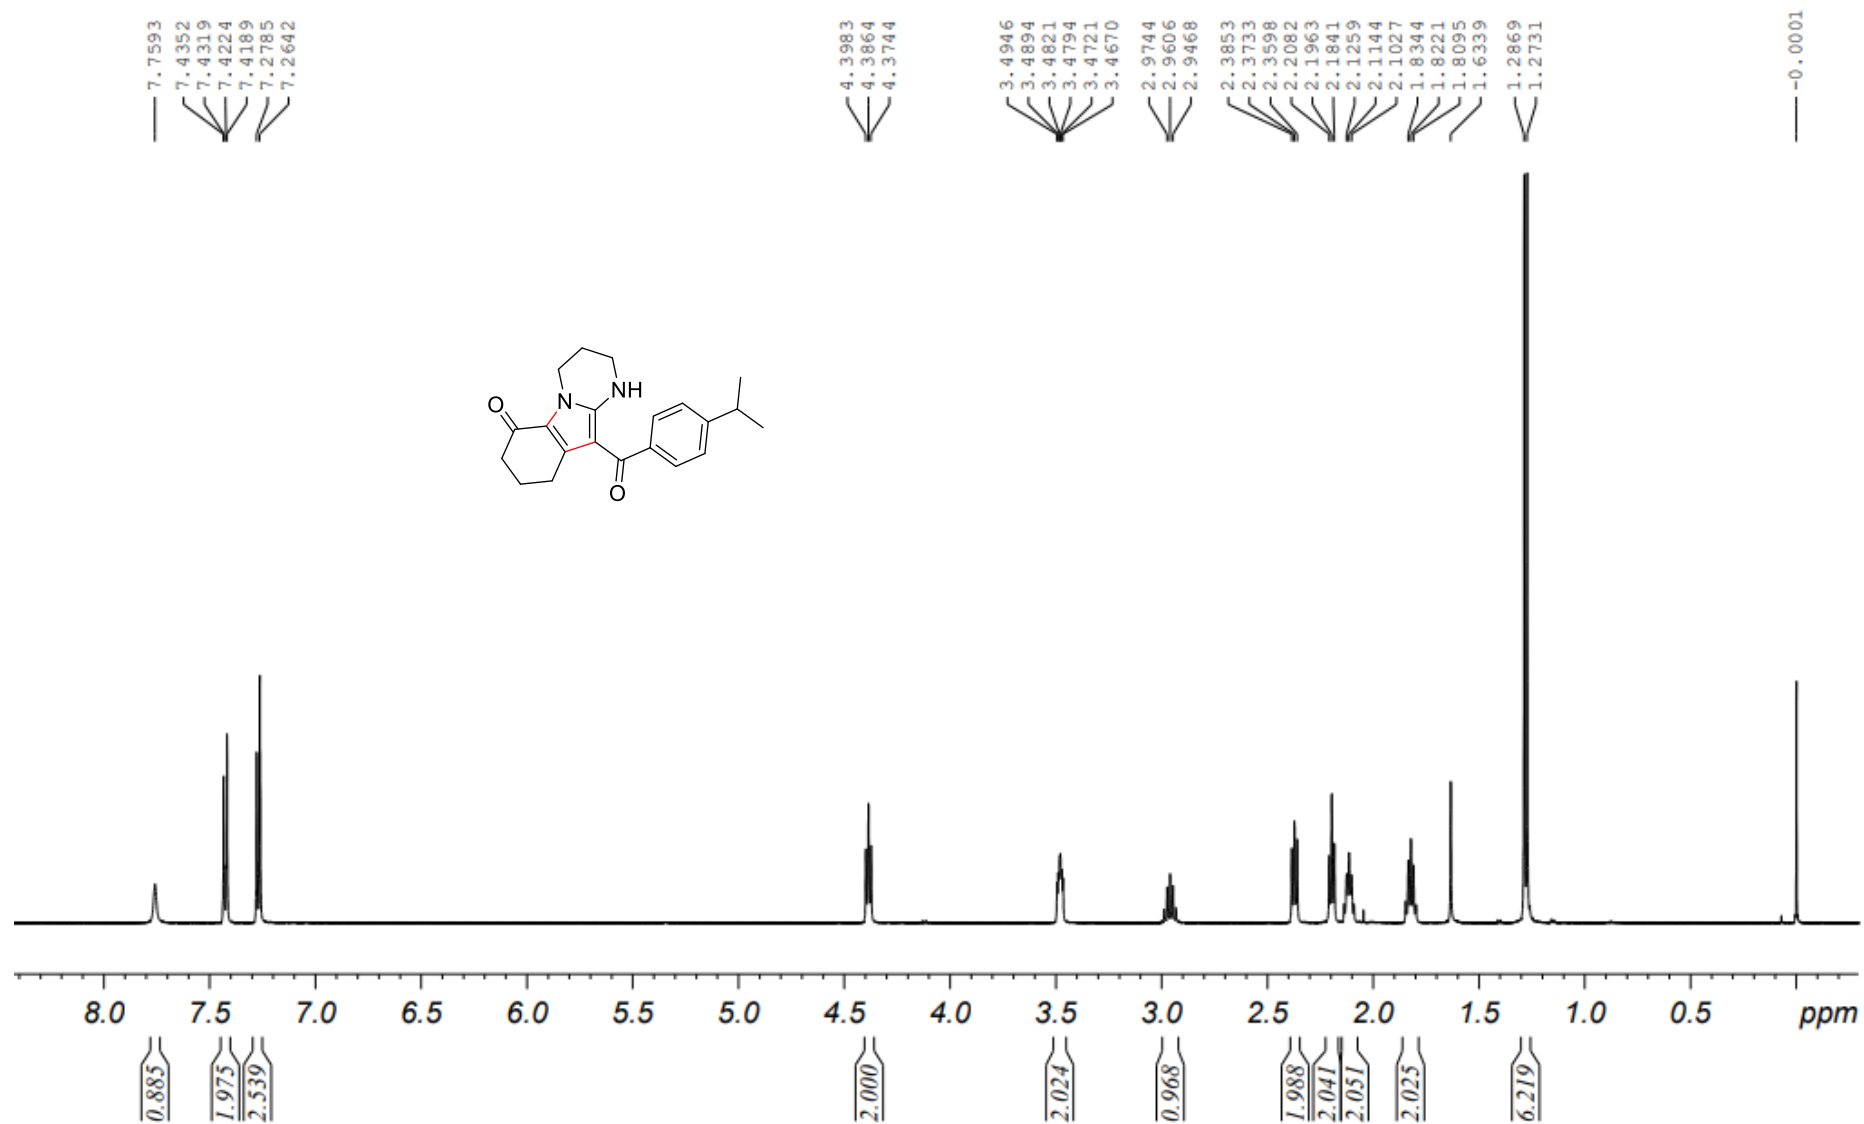

**Figure S43.** <sup>1</sup>H NMR (500 MHz, DMSO-*d*<sub>6</sub>) spectra of compound 4a



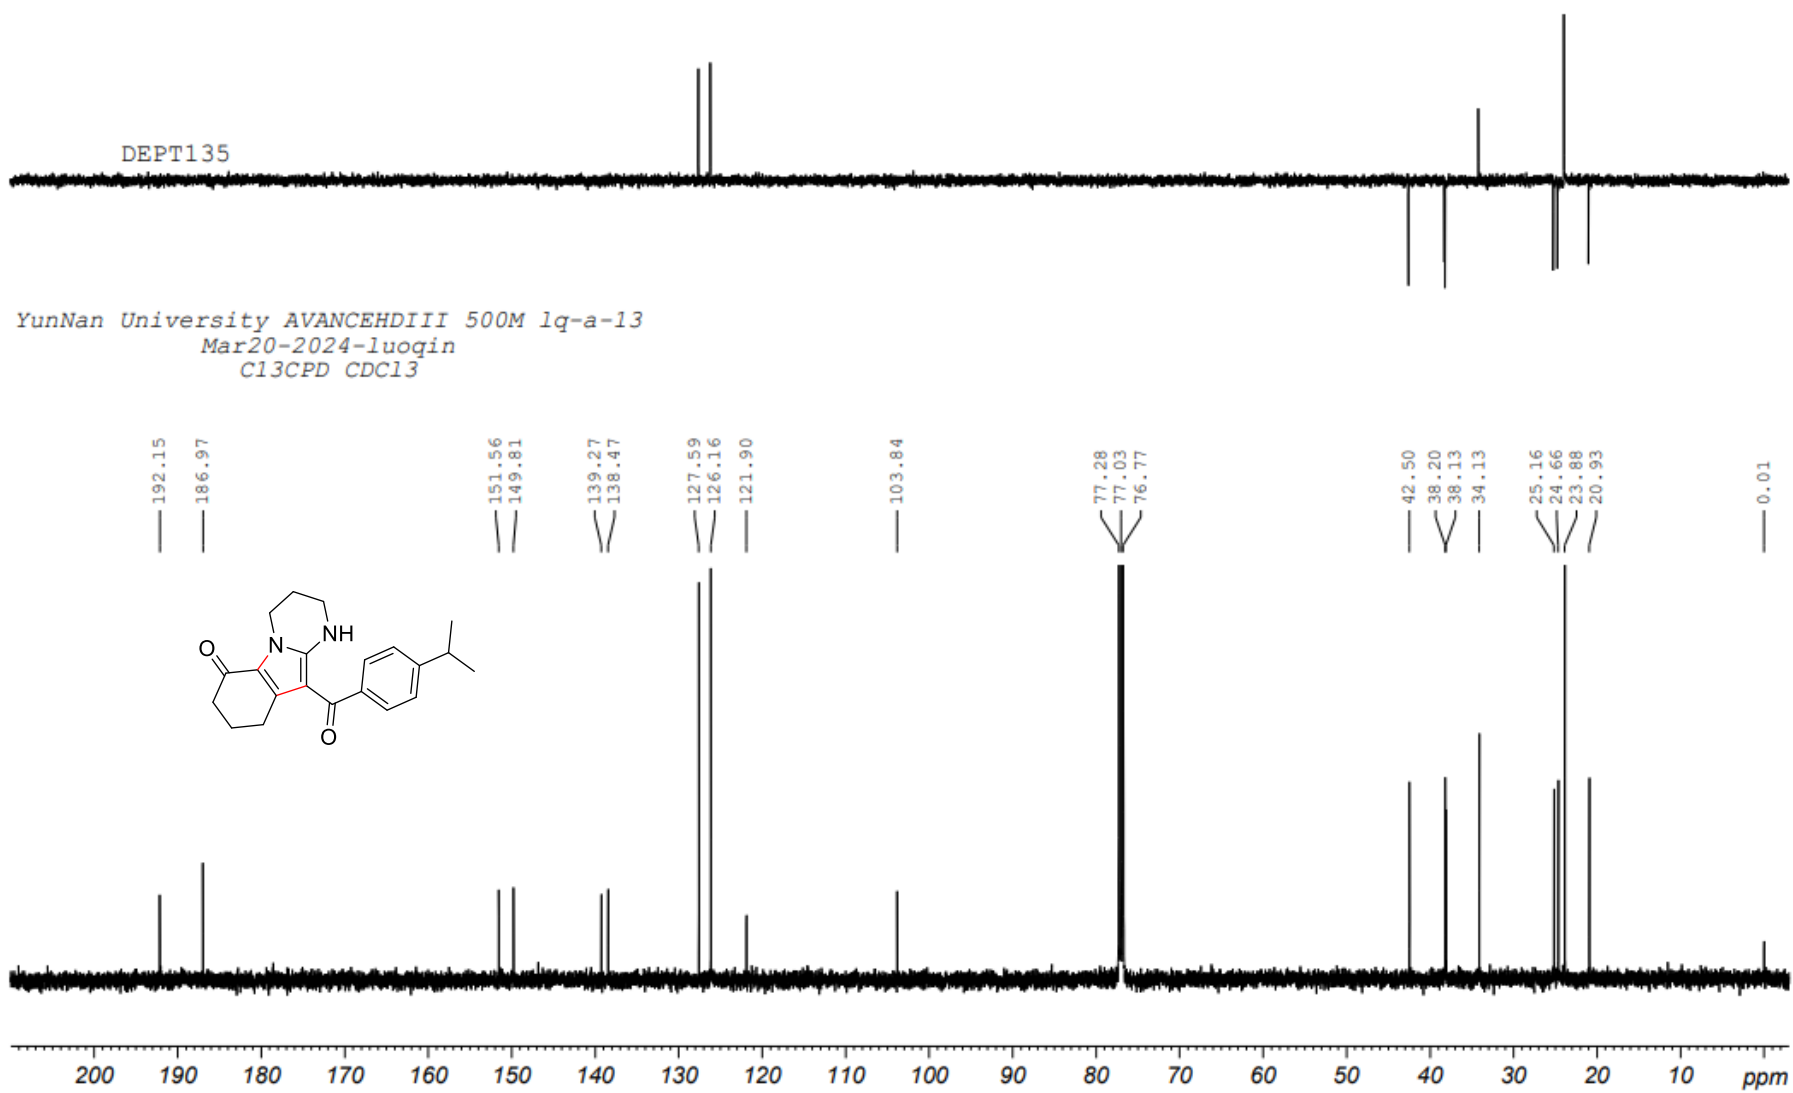

Figure S44.  $^{13}\text{C}$  NMR (150 MHz,  $\text{CDCl}_3$ - $d_6$ ) spectra of compound 4a

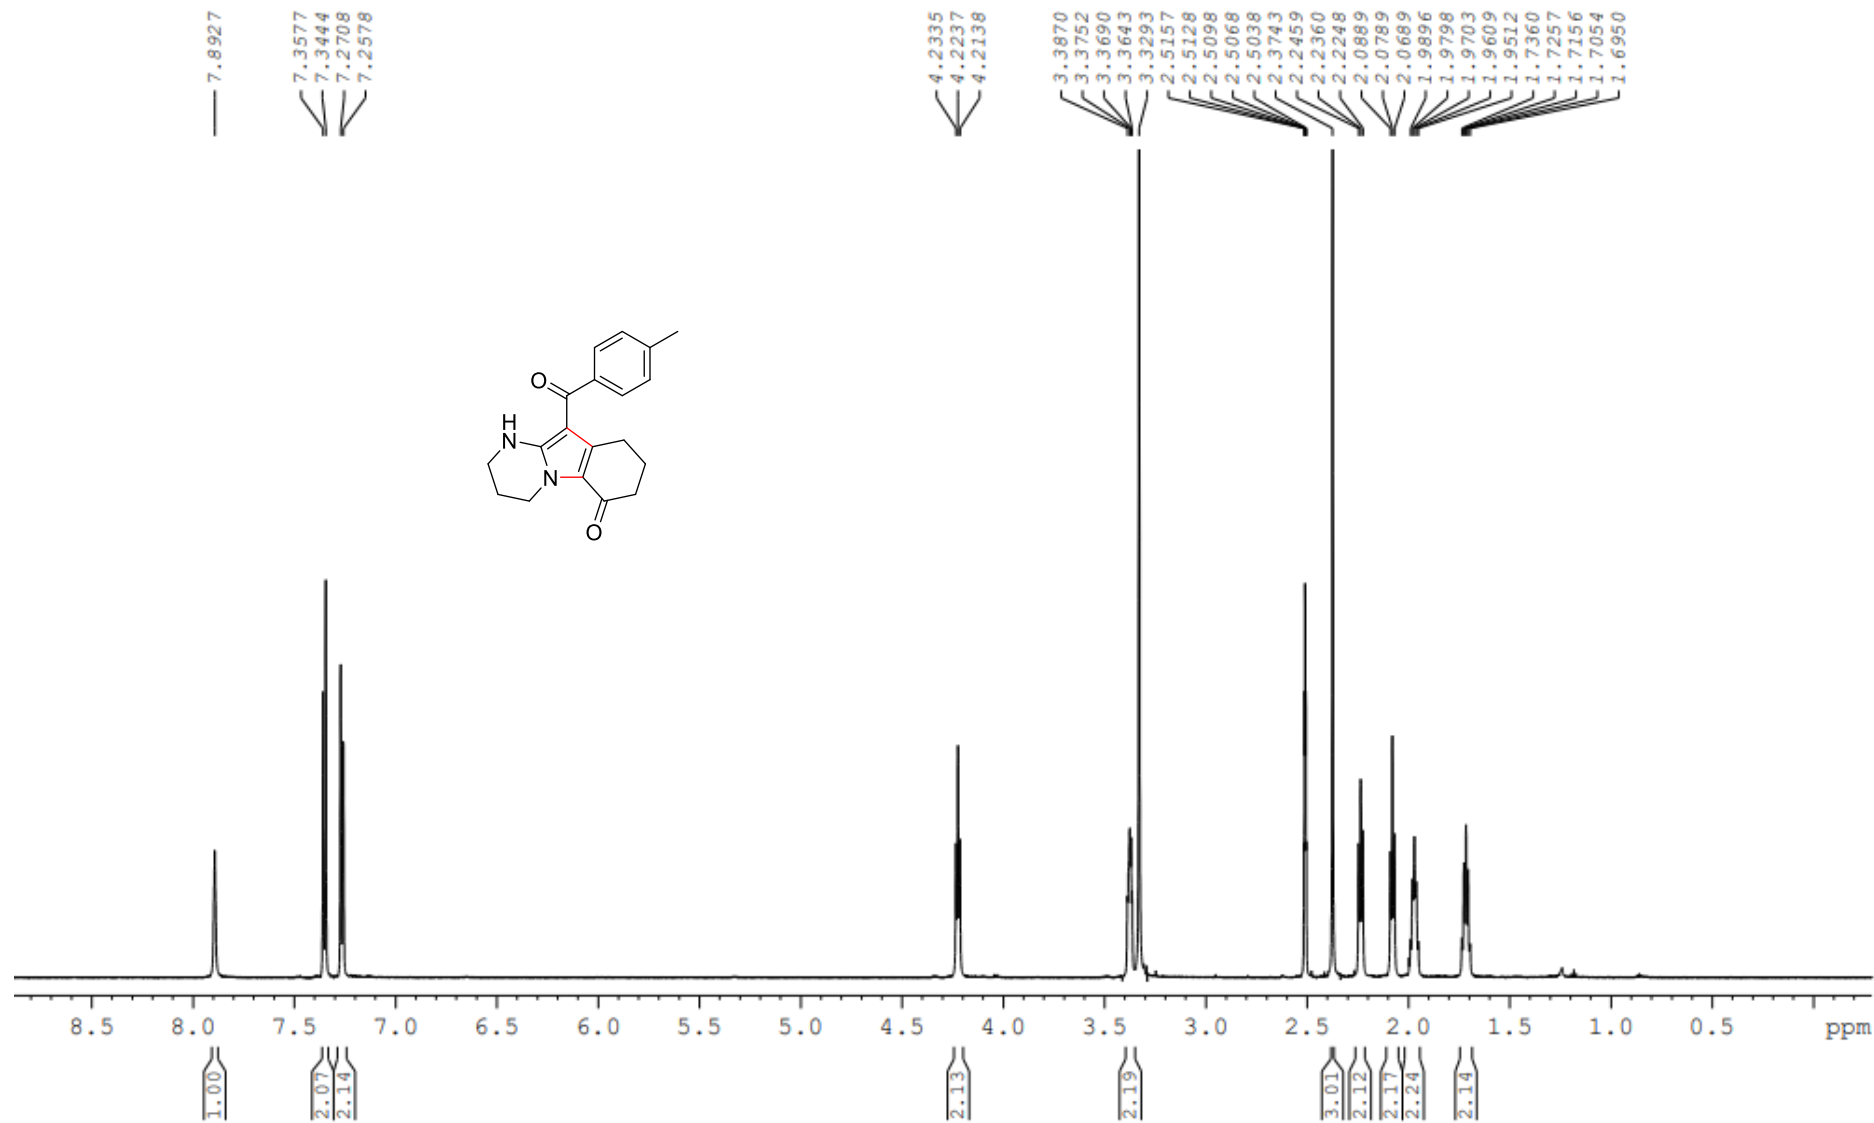

**Figure S45.** <sup>1</sup>H NMR (600 MHz, DMSO-*d*<sub>6</sub>) spectra of compound **4b**

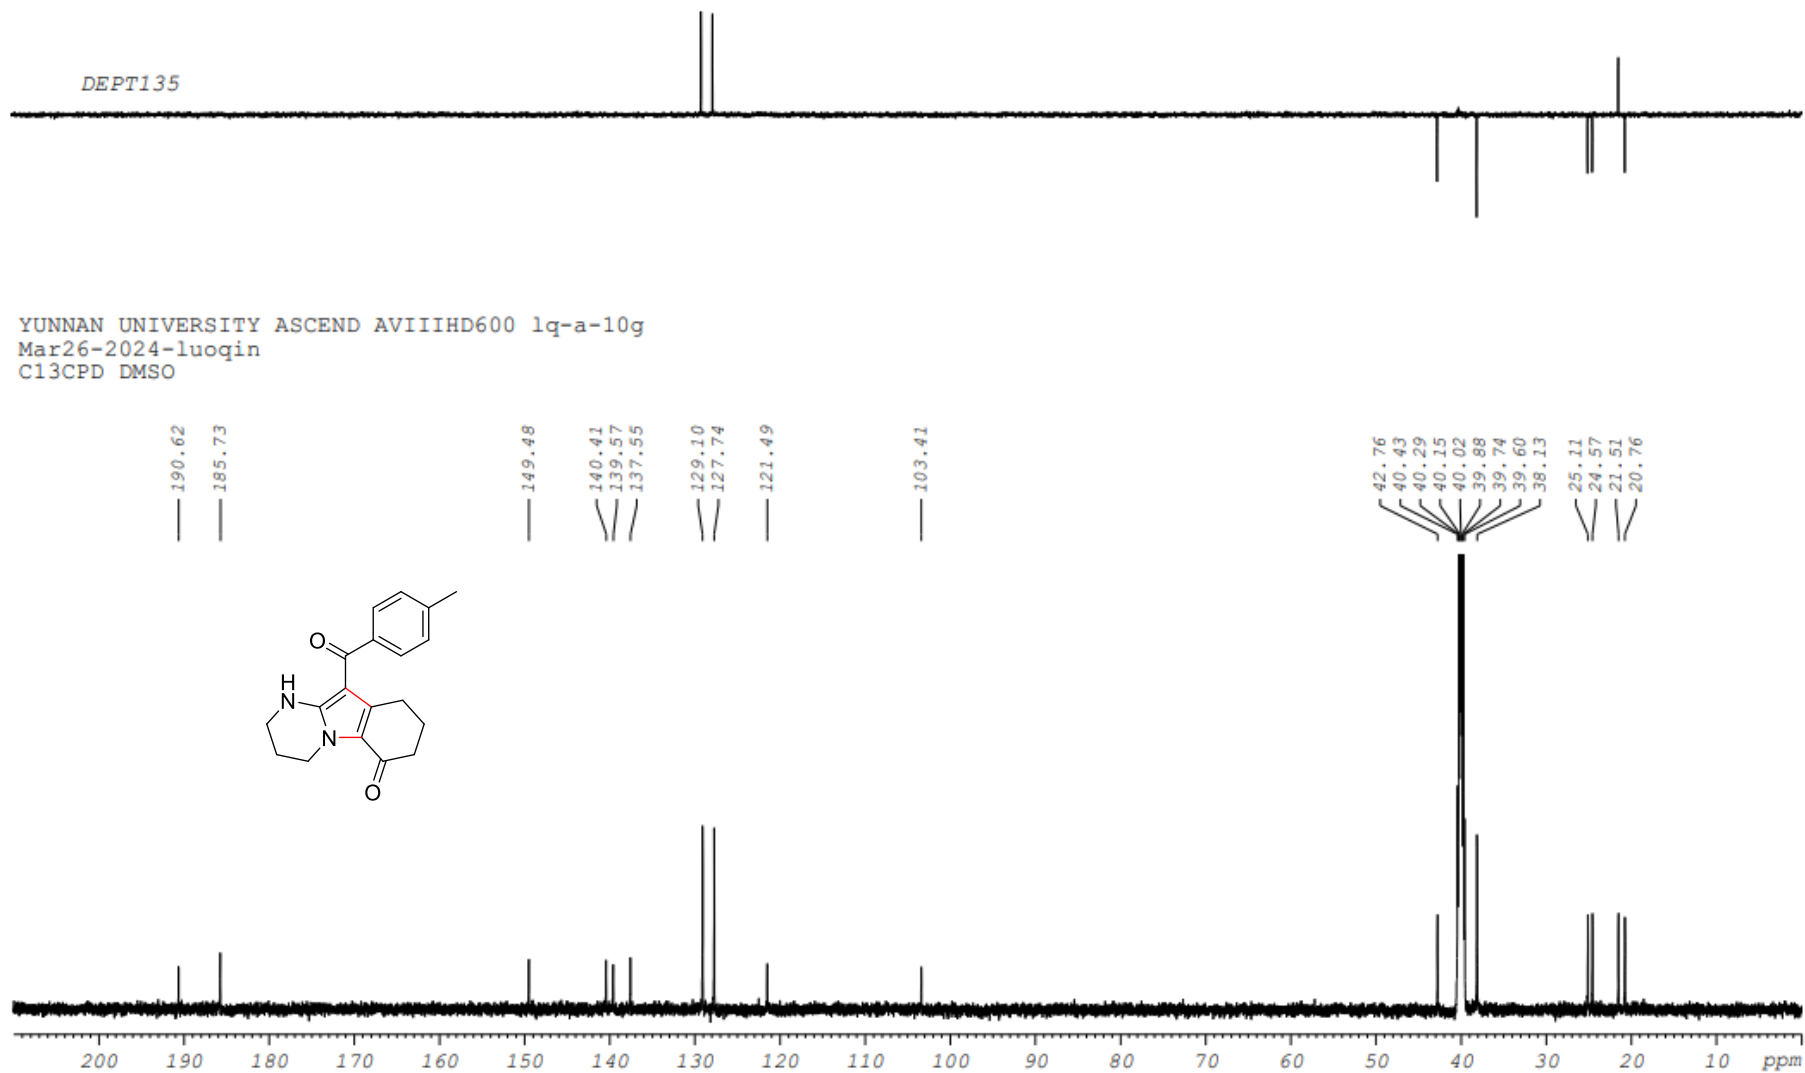

Figure S46.  $^{13}\text{C}$  NMR (150 MHz, DMSO- $d_6$ ) spectra of compound **4b**

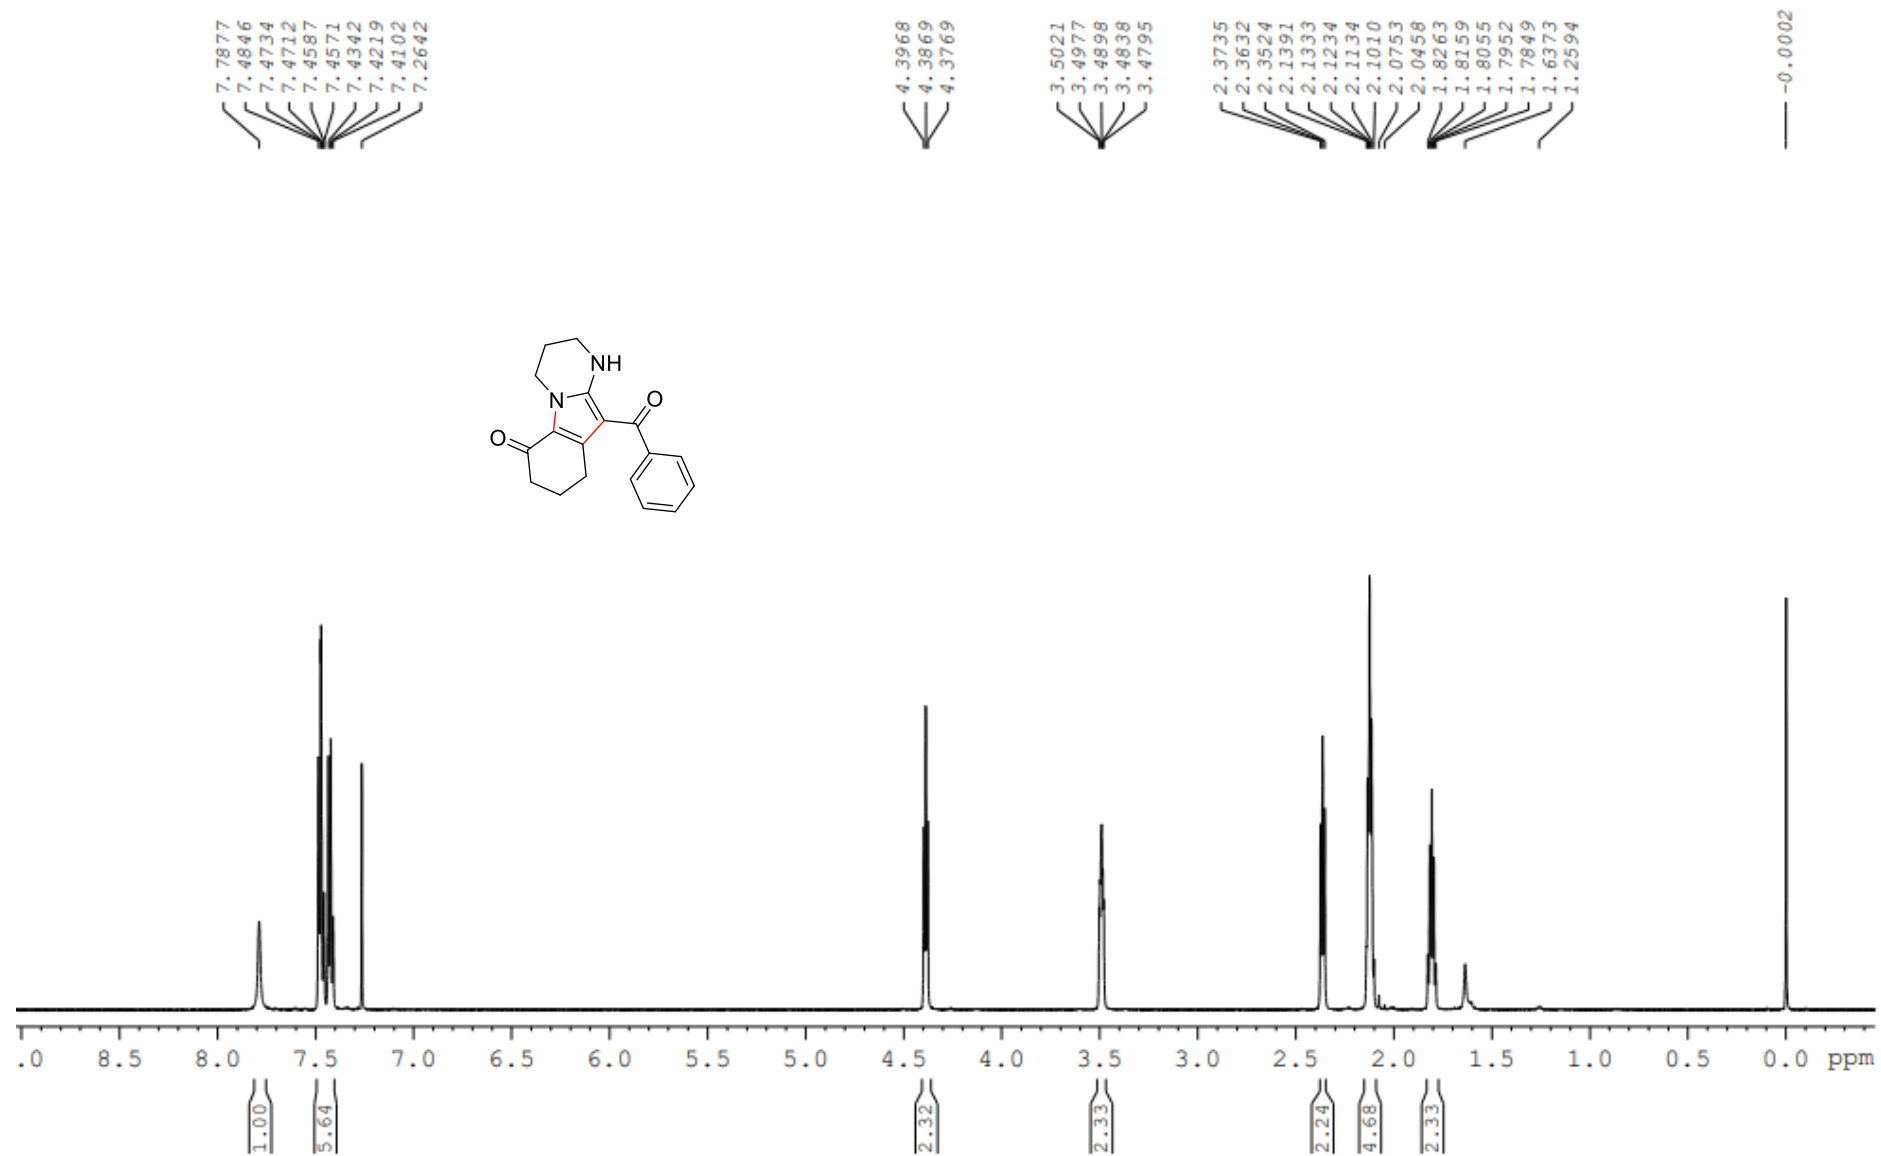

**Figure S47.** <sup>1</sup>H NMR (600 MHz, CDCl<sub>3</sub>-d<sub>6</sub>) spectra of compound **4c**

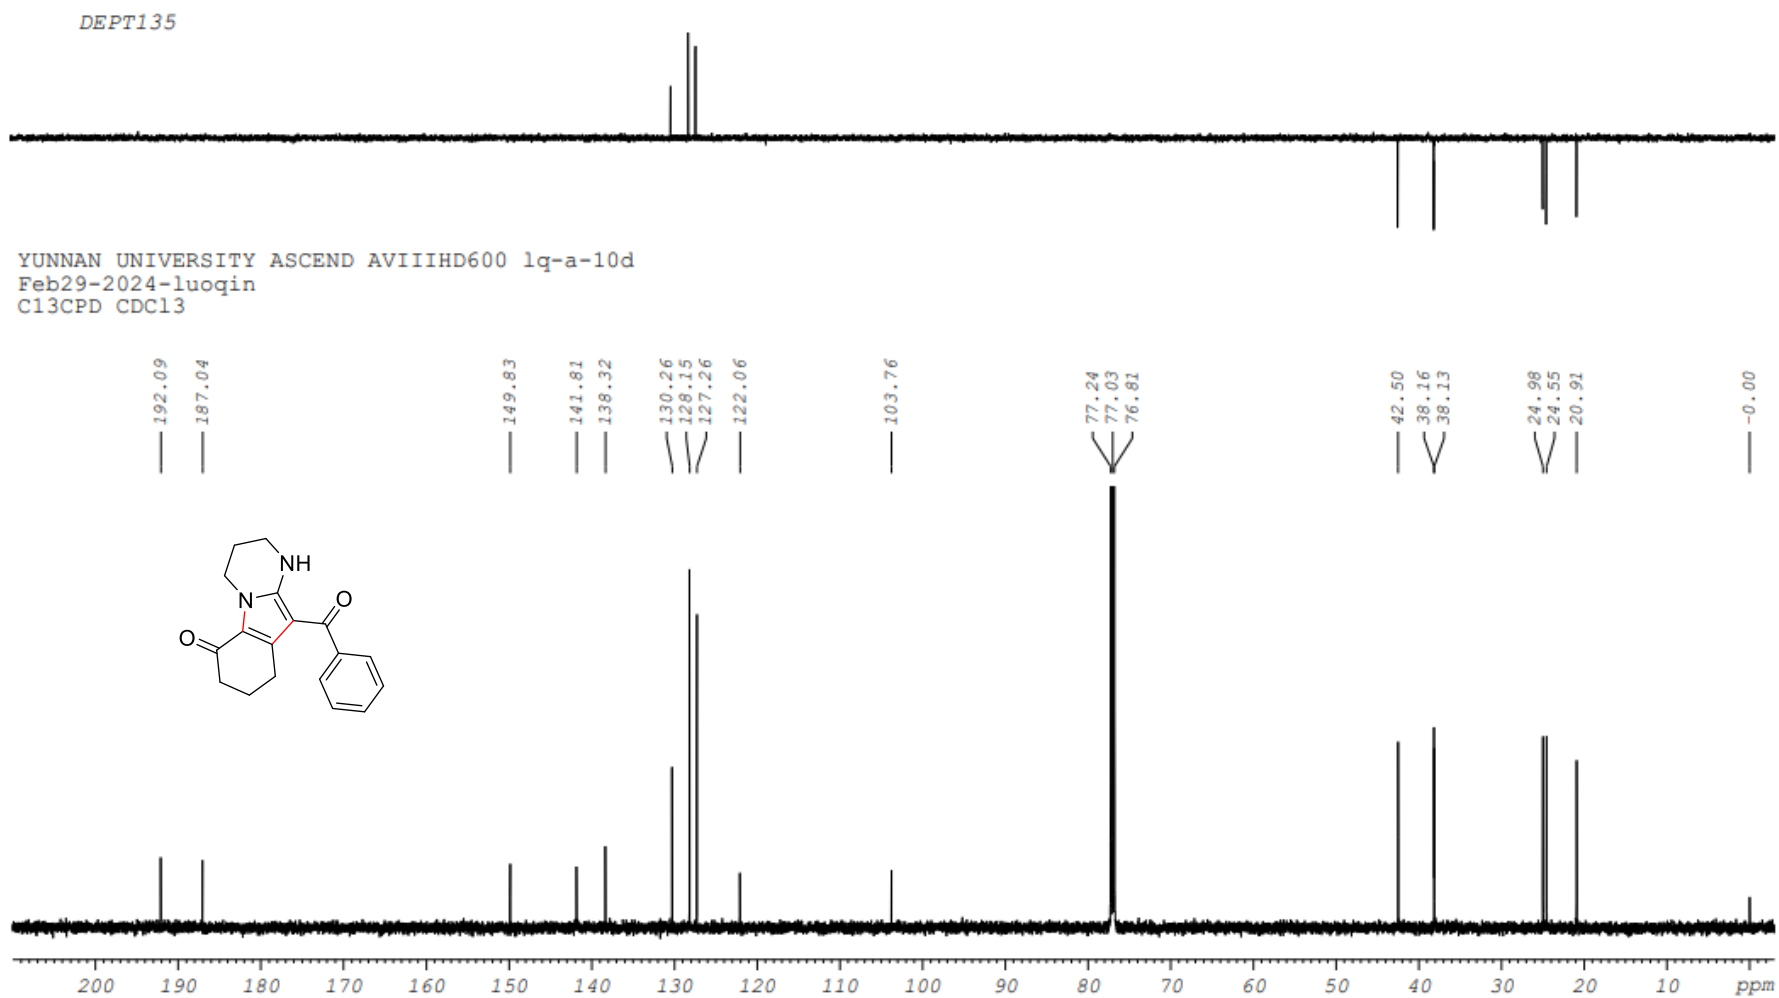

Figure S48.  $^{13}\text{C}$  NMR (150 MHz,  $\text{CDCl}_3-d_6$ ) spectra of compound 4c

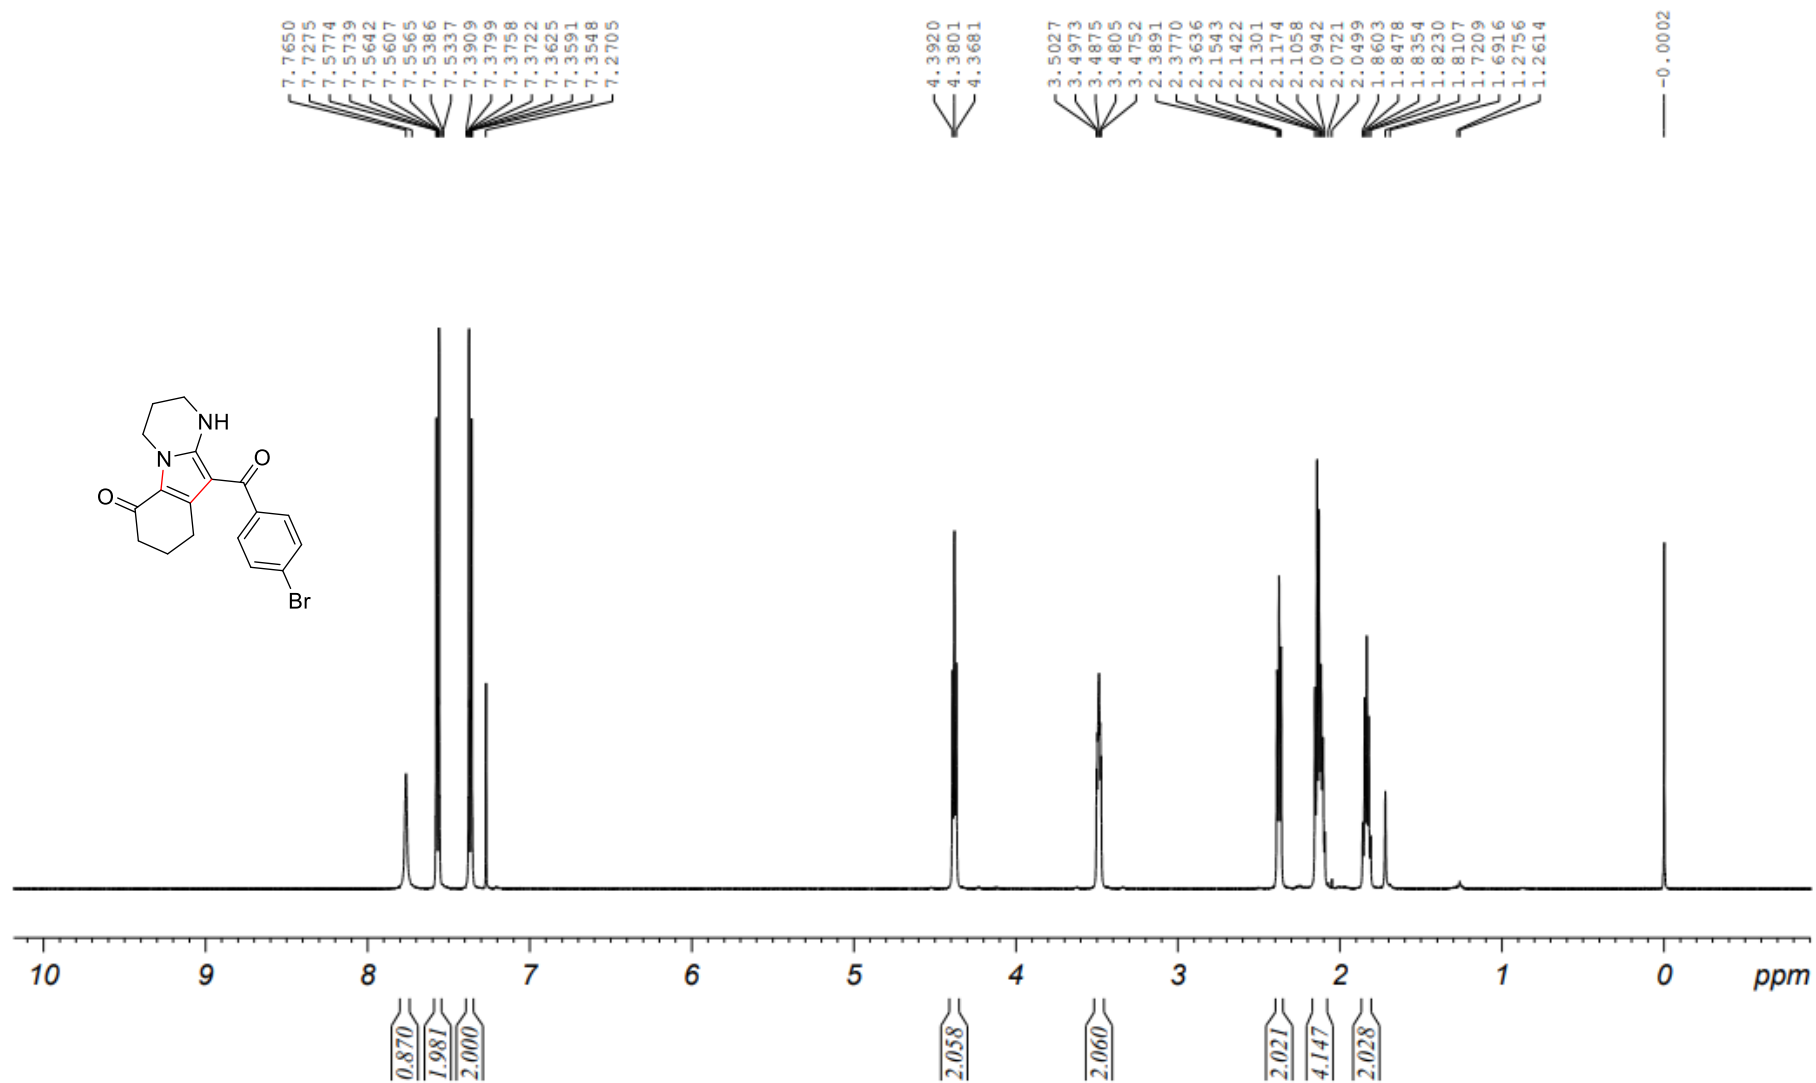

**Figure S49.** <sup>1</sup>H NMR (500 MHz, CDCl<sub>3</sub>-d<sub>6</sub>) spectra of compound **4d**

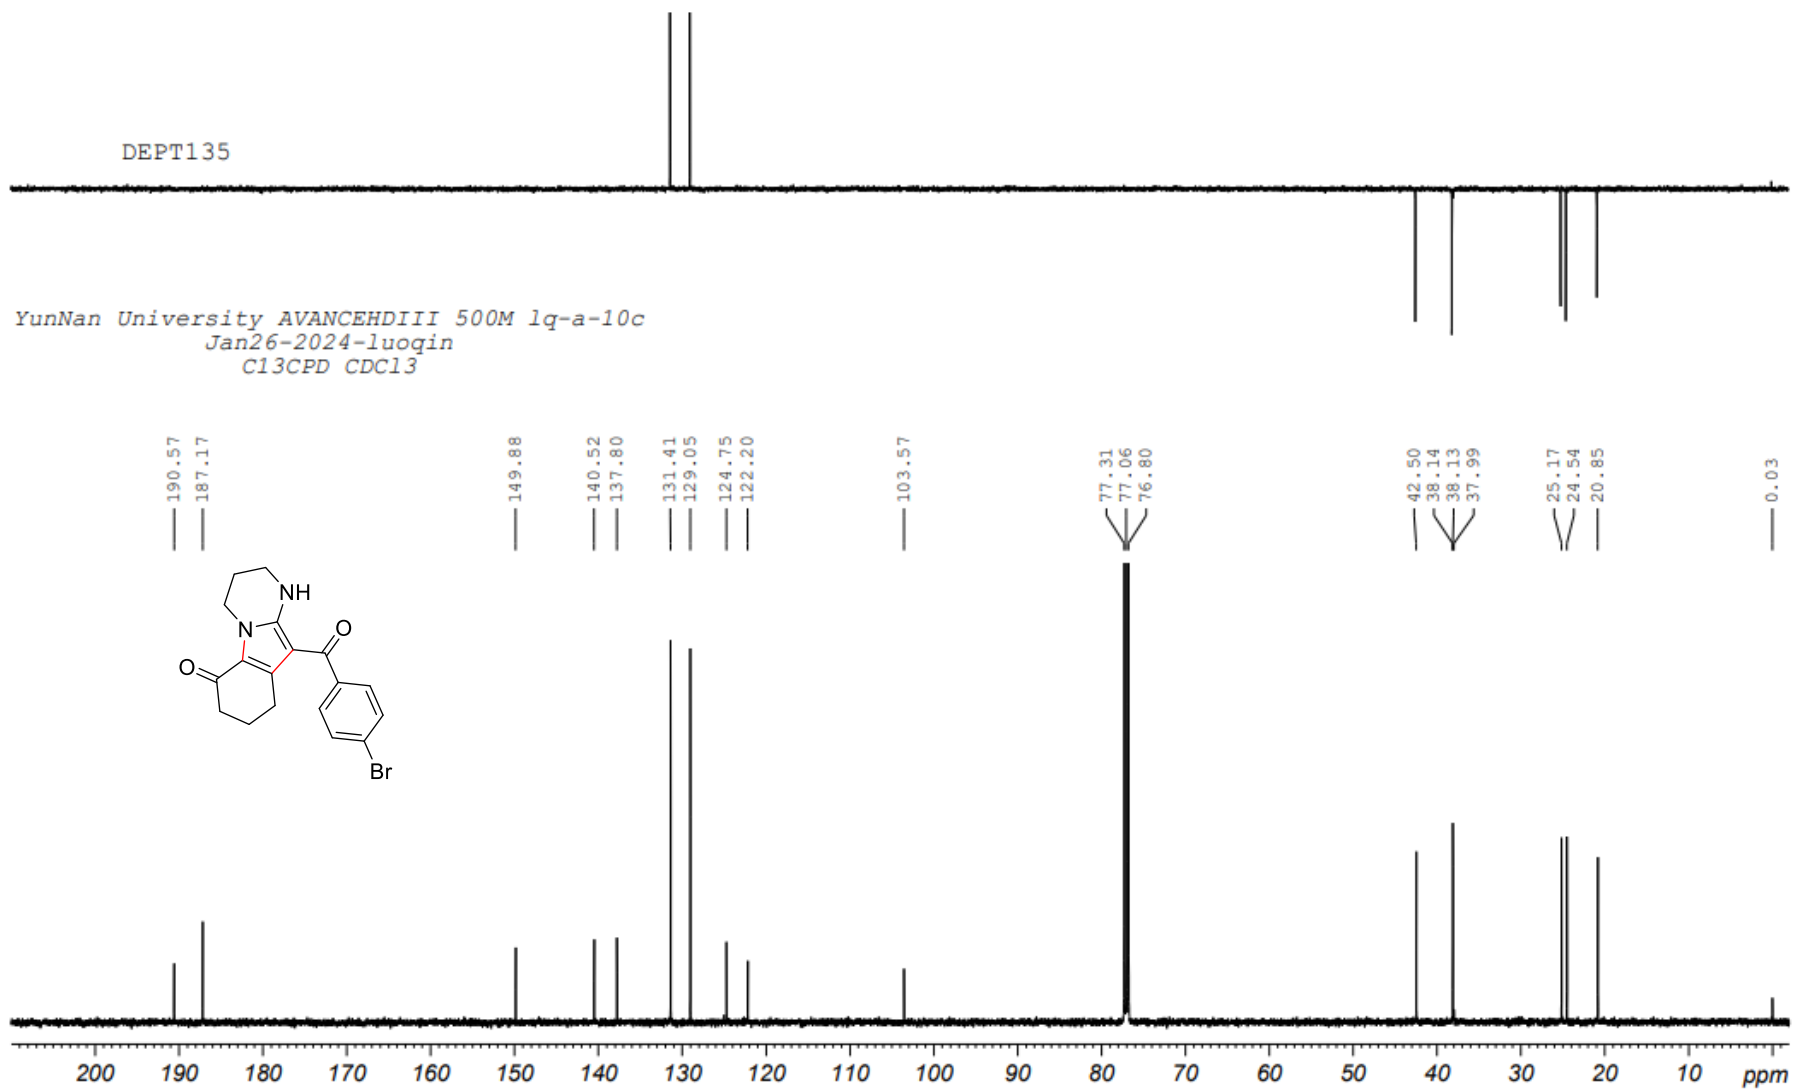

Figure S50.  $^{13}\text{C}$  NMR (125 MHz,  $\text{CDCl}_3-d_6$ ) spectra of compound **4d**

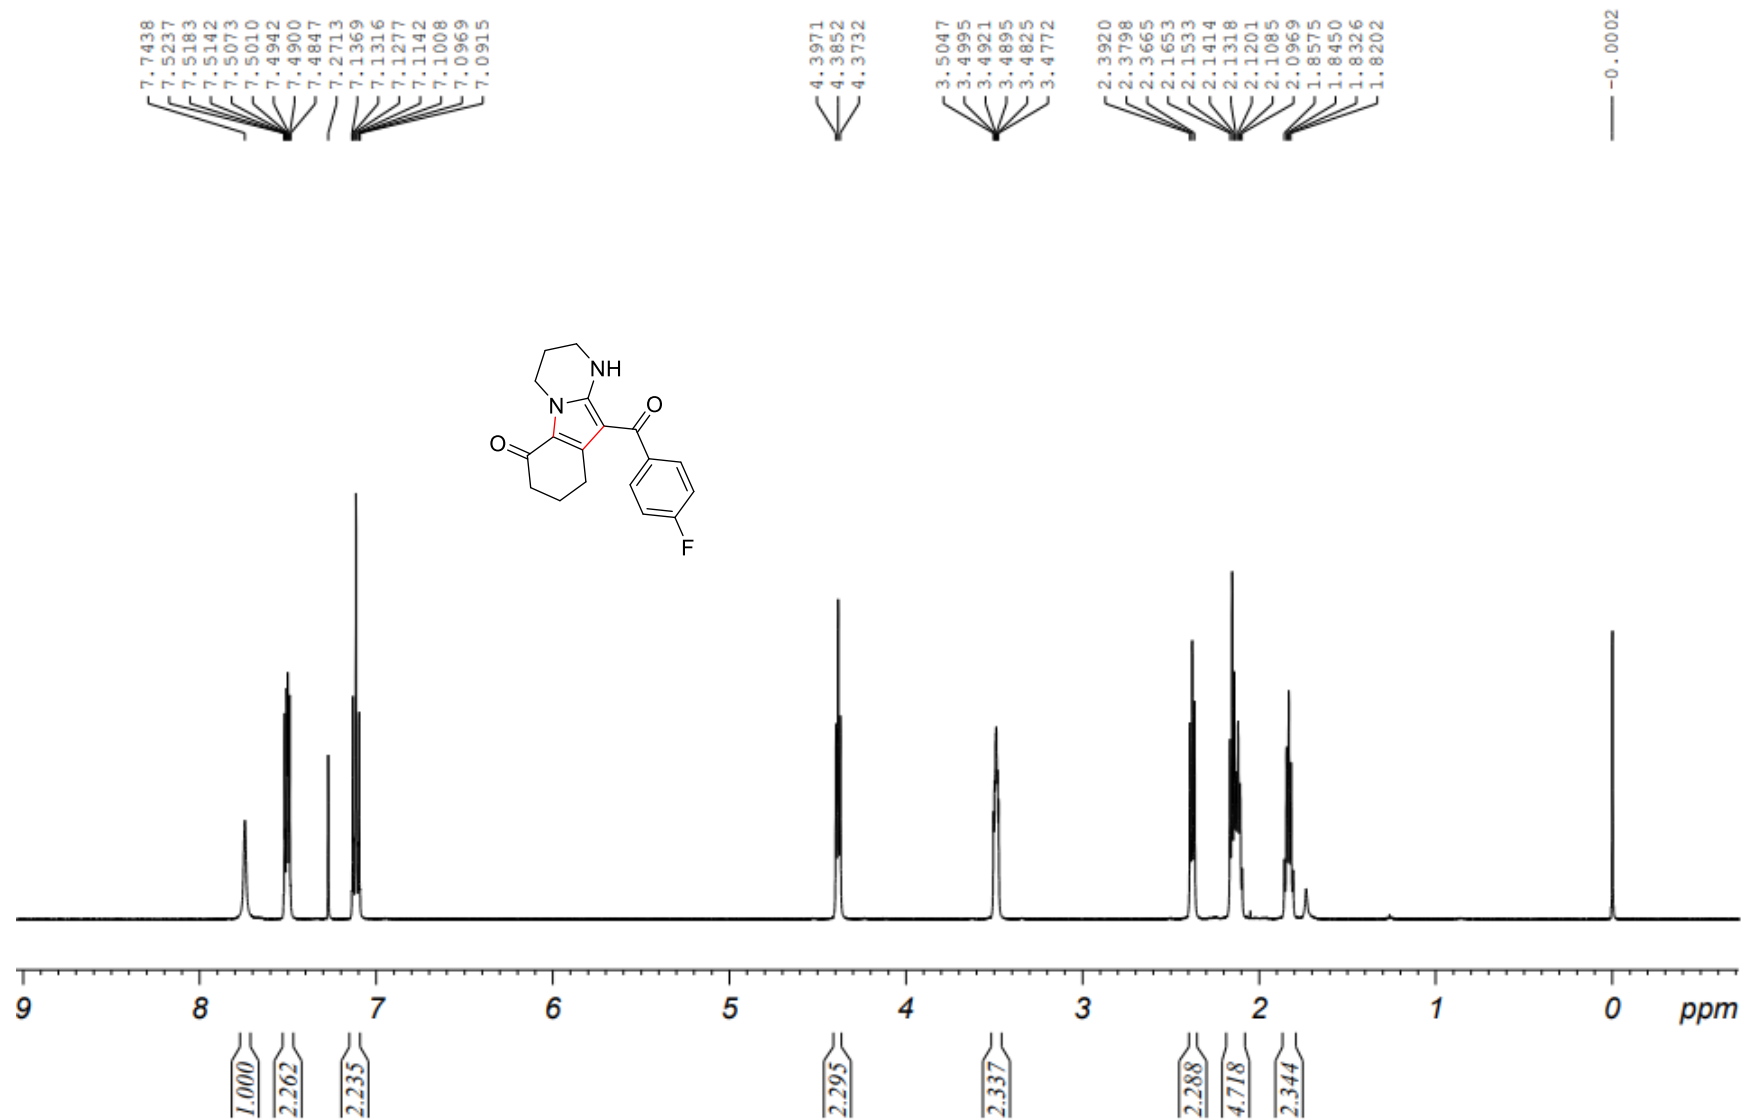

**Figure S51.**  $^1\text{H}$  NMR (500 MHz,  $\text{CDCl}_3-d_6$ ) spectra of compound **4e**



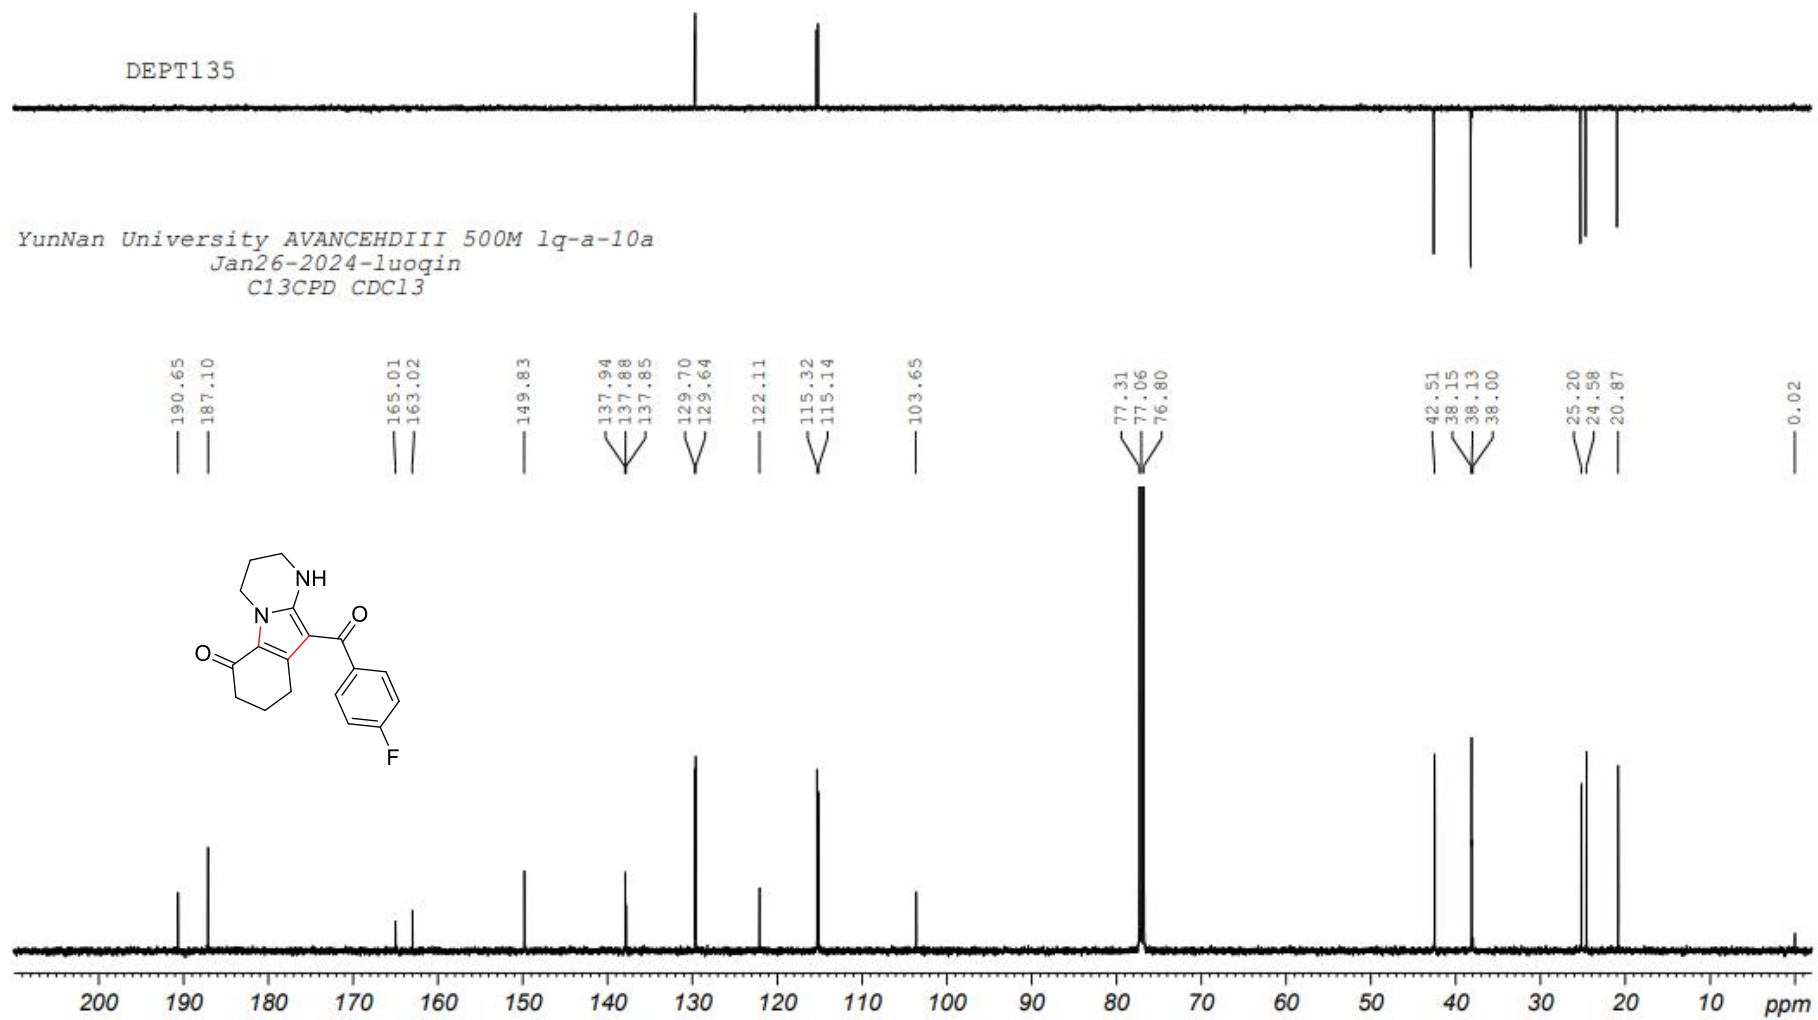

Figure S52.  $^{13}\text{C}$  NMR (125 MHz,  $\text{CDCl}_3-d_6$ ) spectra of compound 4e

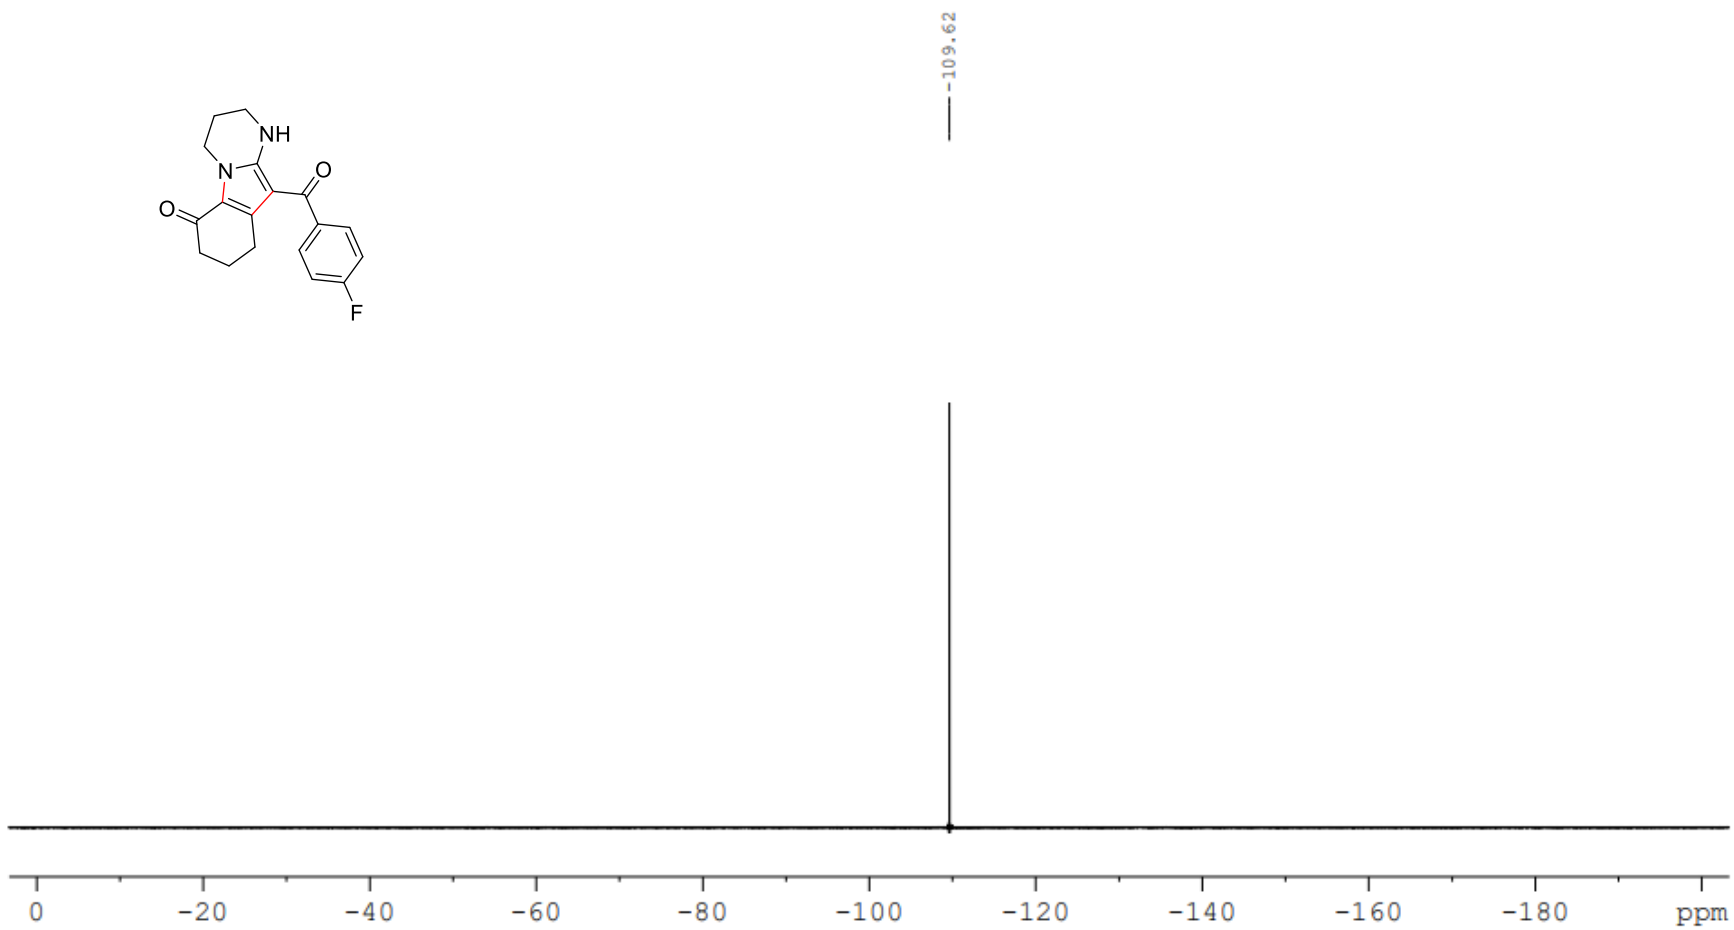

**Figure S53.**  $^{19}\text{F}$  NMR (475 MHz,  $\text{CDCl}_3\text{-}d_6$ ) spectra of compound **4e**

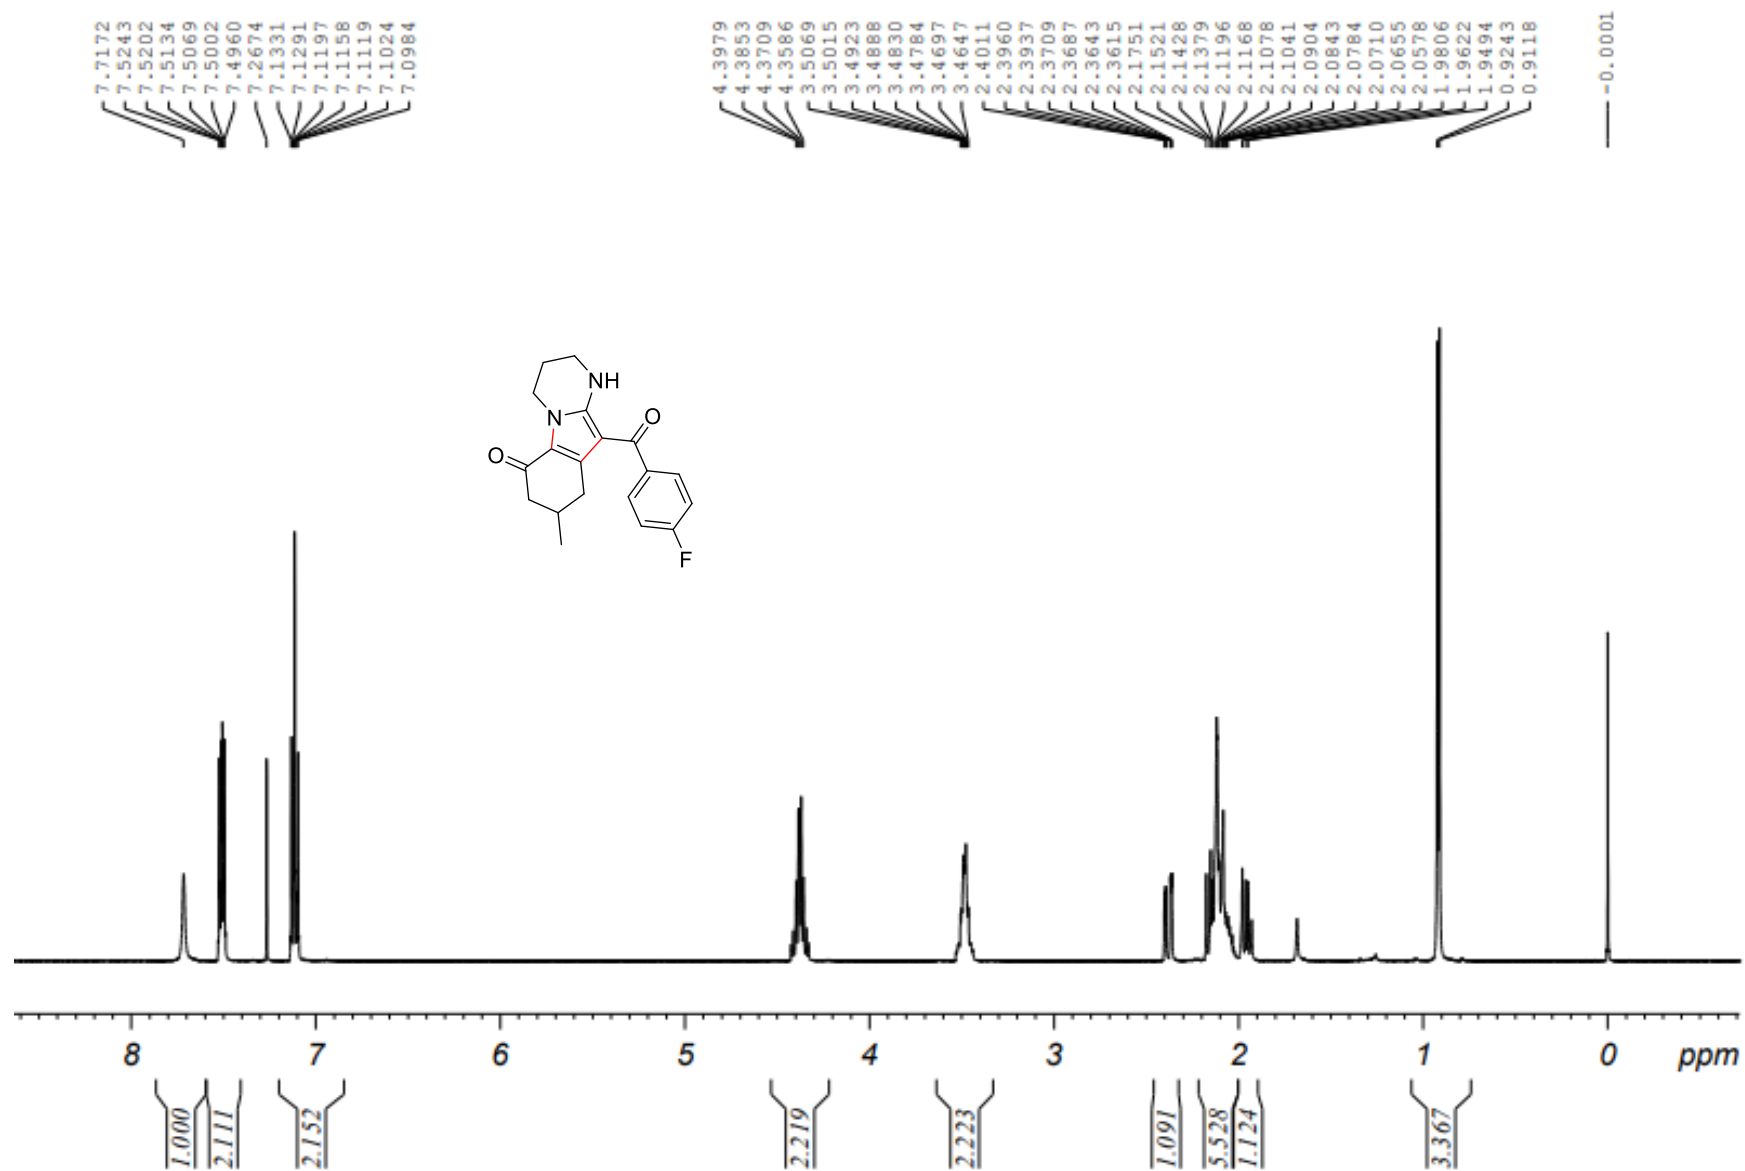

**Figure S54.** <sup>1</sup>H NMR (500 MHz, CDCl<sub>3</sub>-d<sub>6</sub>) spectra of compound 4f

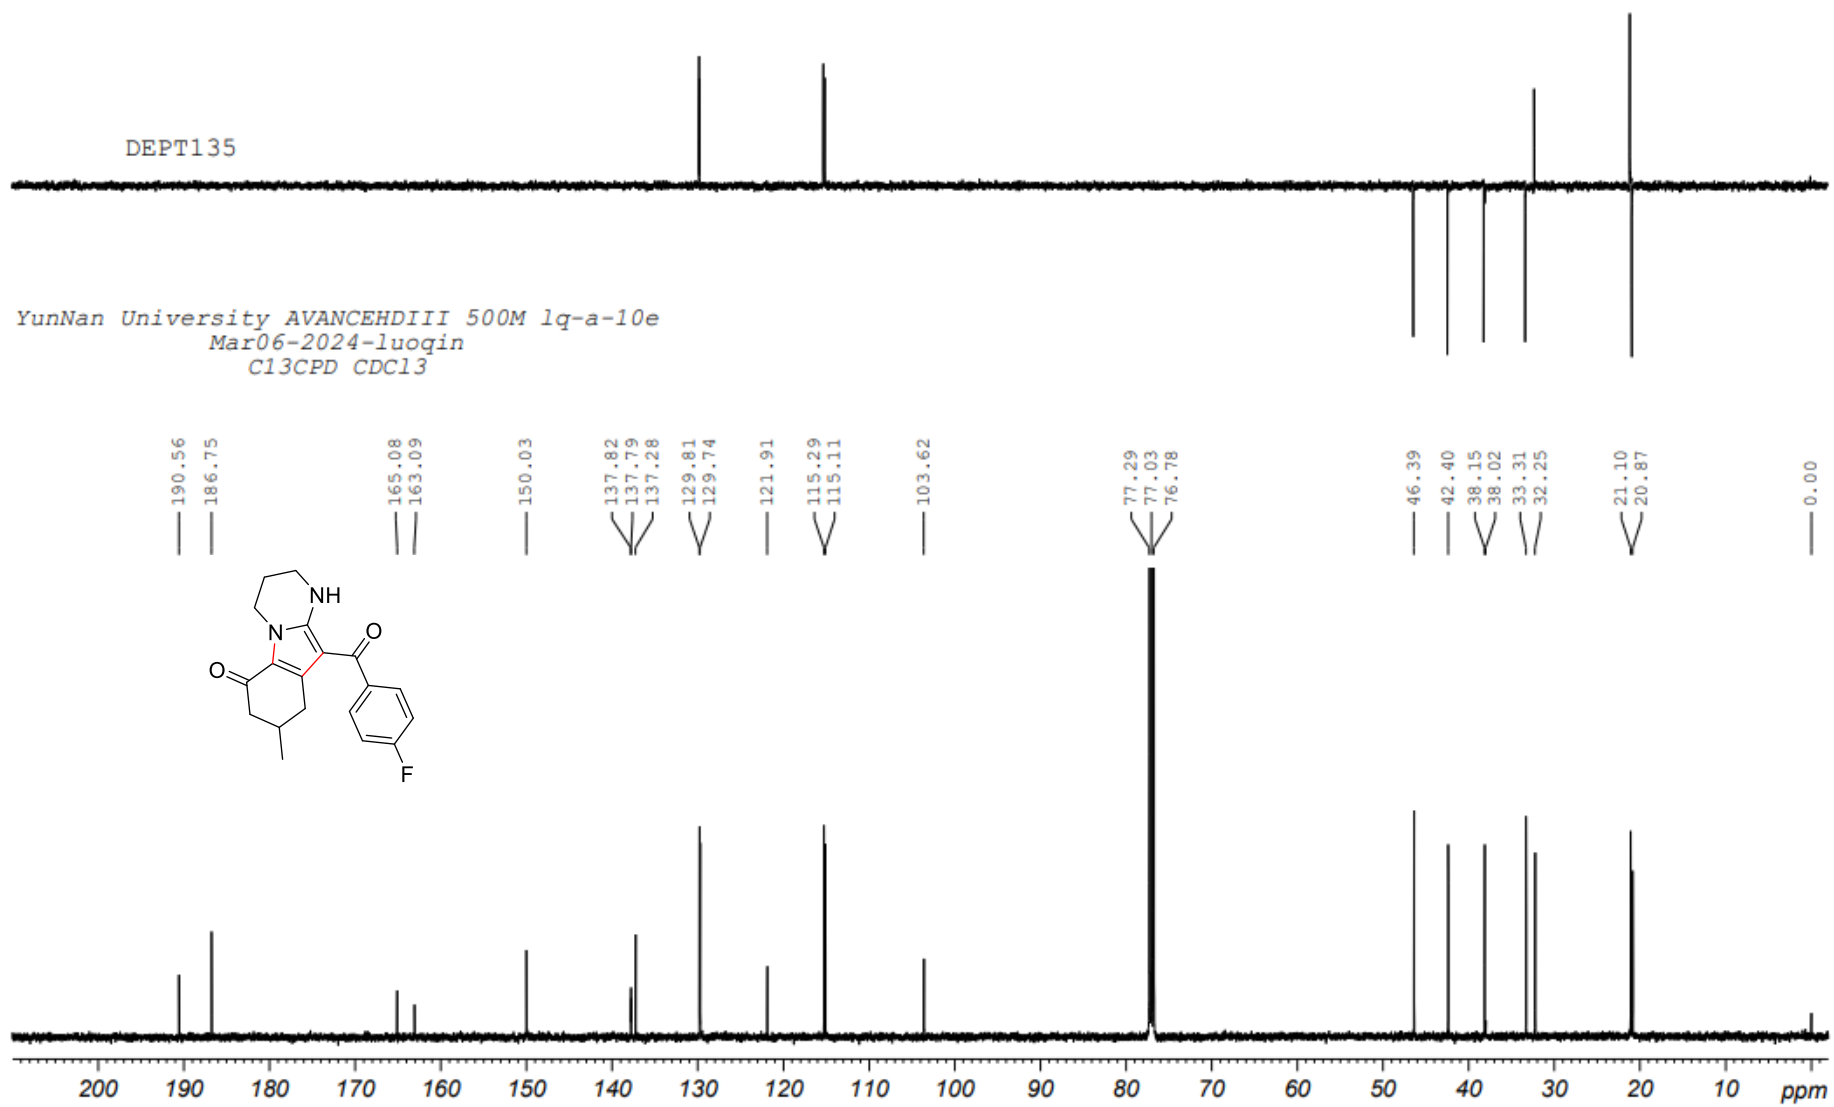

**Figure S55.**  $^{13}\text{C}$  NMR (125 MHz,  $\text{CDCl}_3-d_6$ ) spectra of compound **4f**

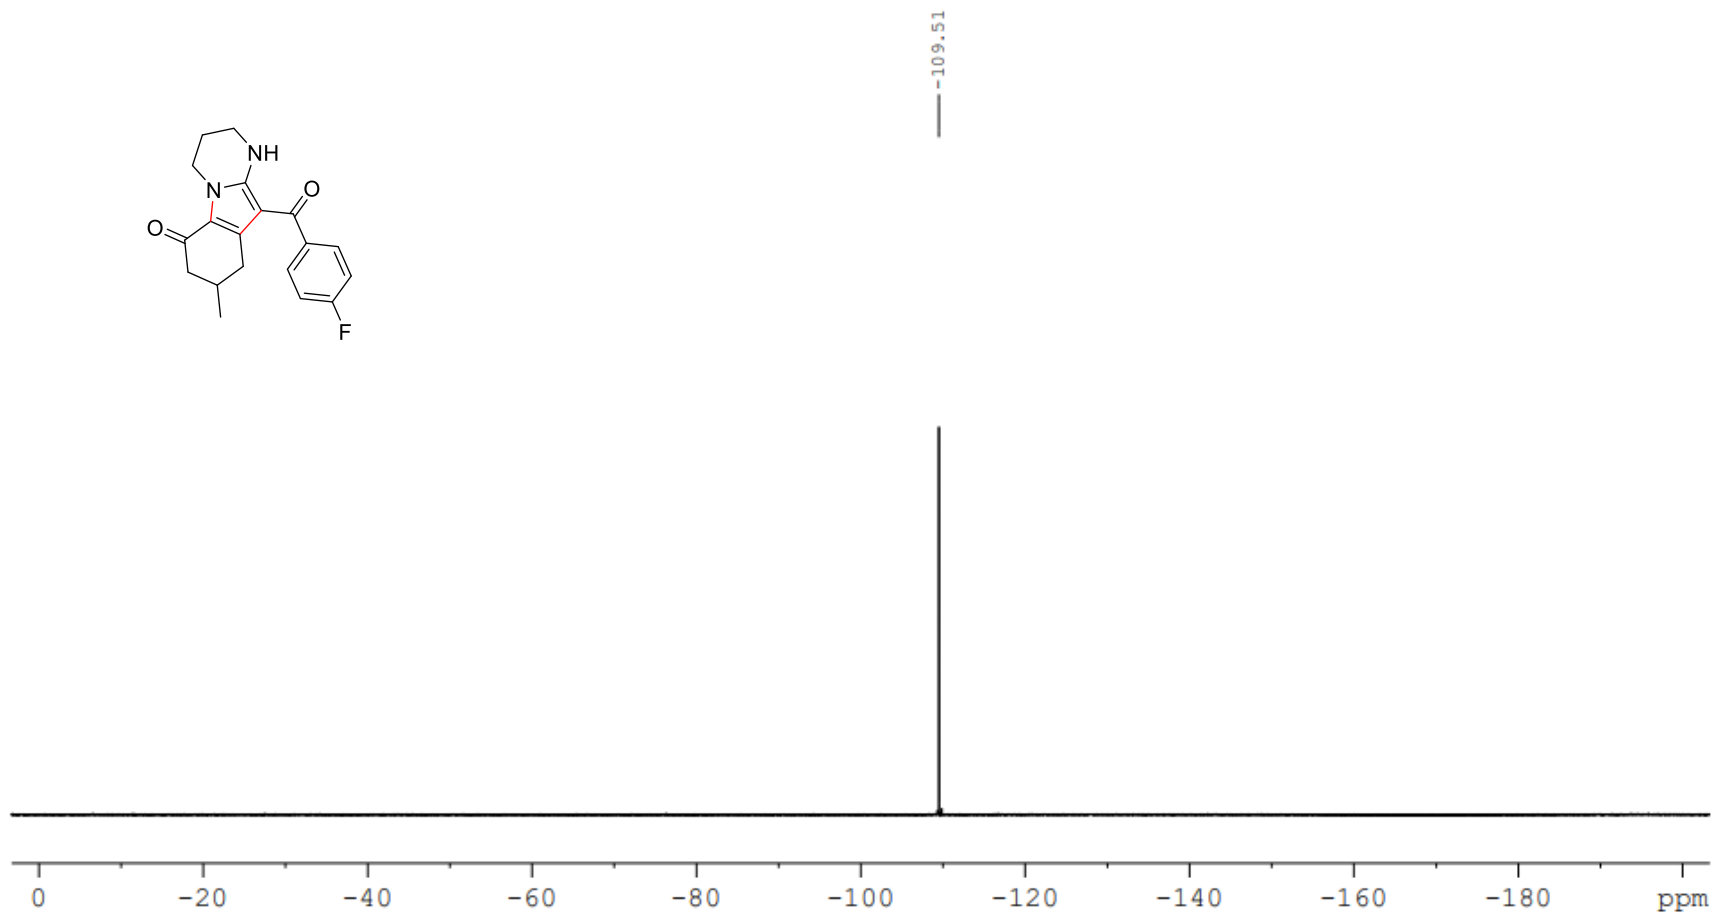

**Figure S56.**  $^{19}\text{F}$  NMR (475 MHz,  $\text{CDCl}_3-d_6$ ) spectra of compound **4f**

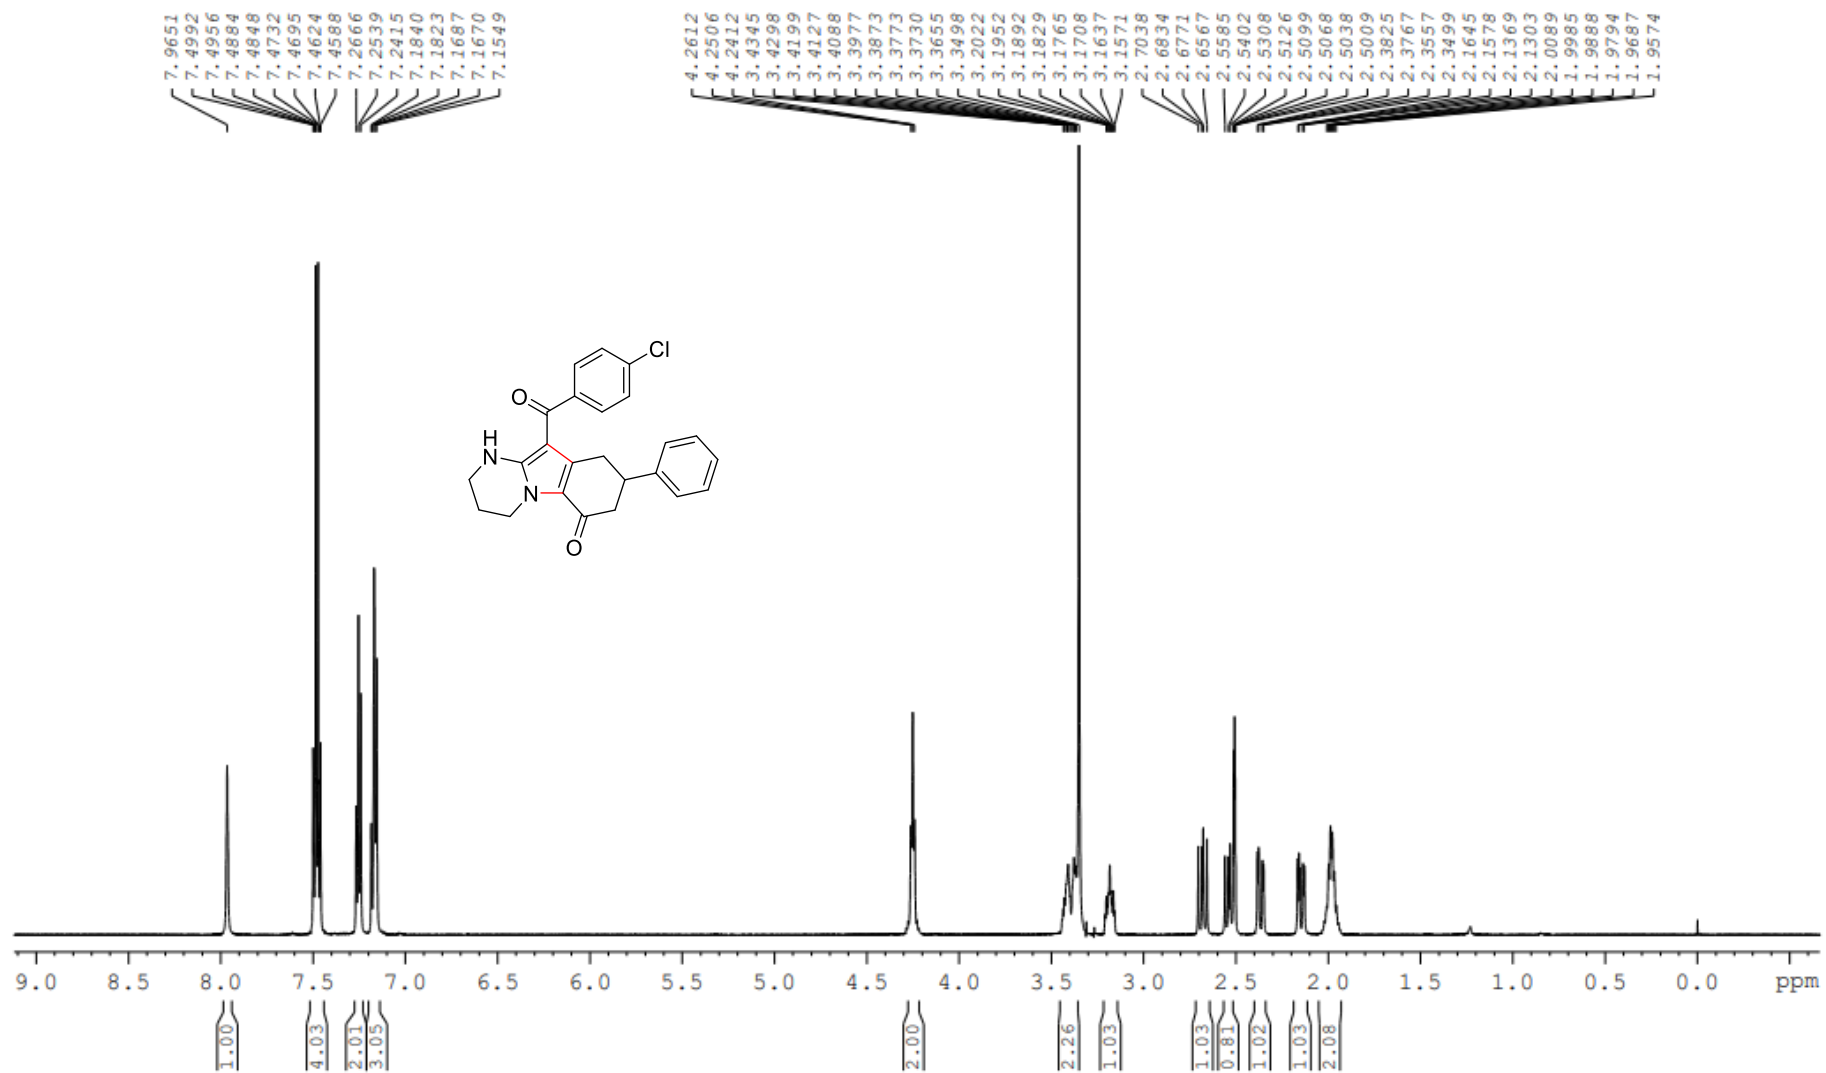

Figure S57.  $^1\text{H}$  NMR (600 MHz,  $\text{DMSO-}d_6$ ) spectra of compound **4g**

DEPT135

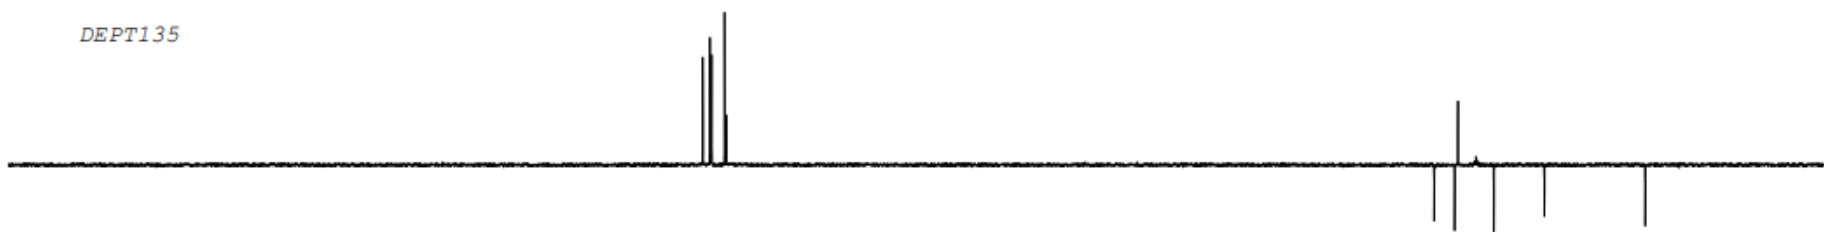

YUNNAN UNIVERSITY ASCEND AVIIIHD600 1q-a-10j  
Apr19-2024-luoqin  
C13CPD DMSO

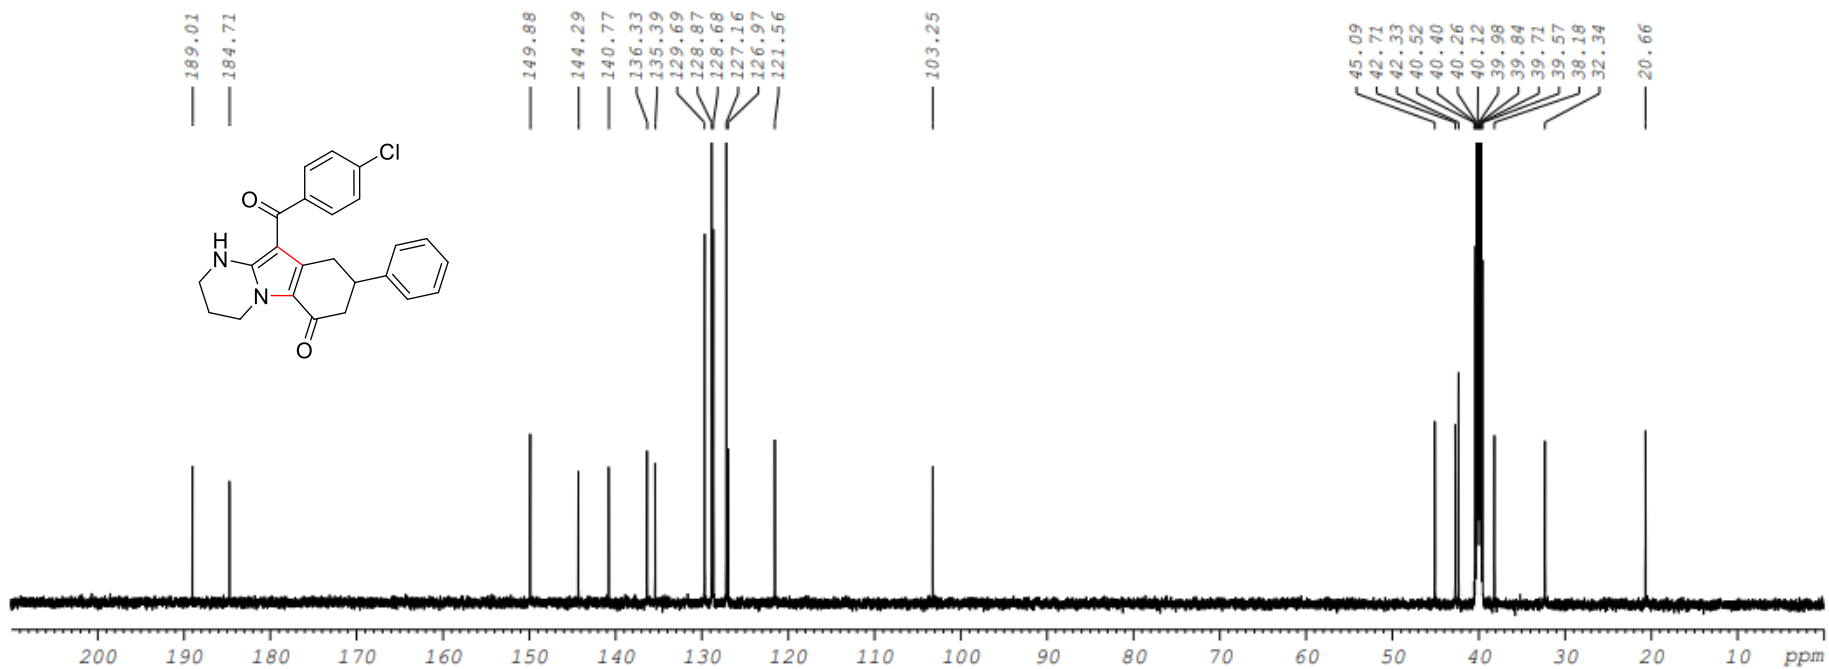

Figure S58.  $^{13}\text{C}$  NMR (150 MHz, DMSO- $d_6$ ) spectra of compound 4g

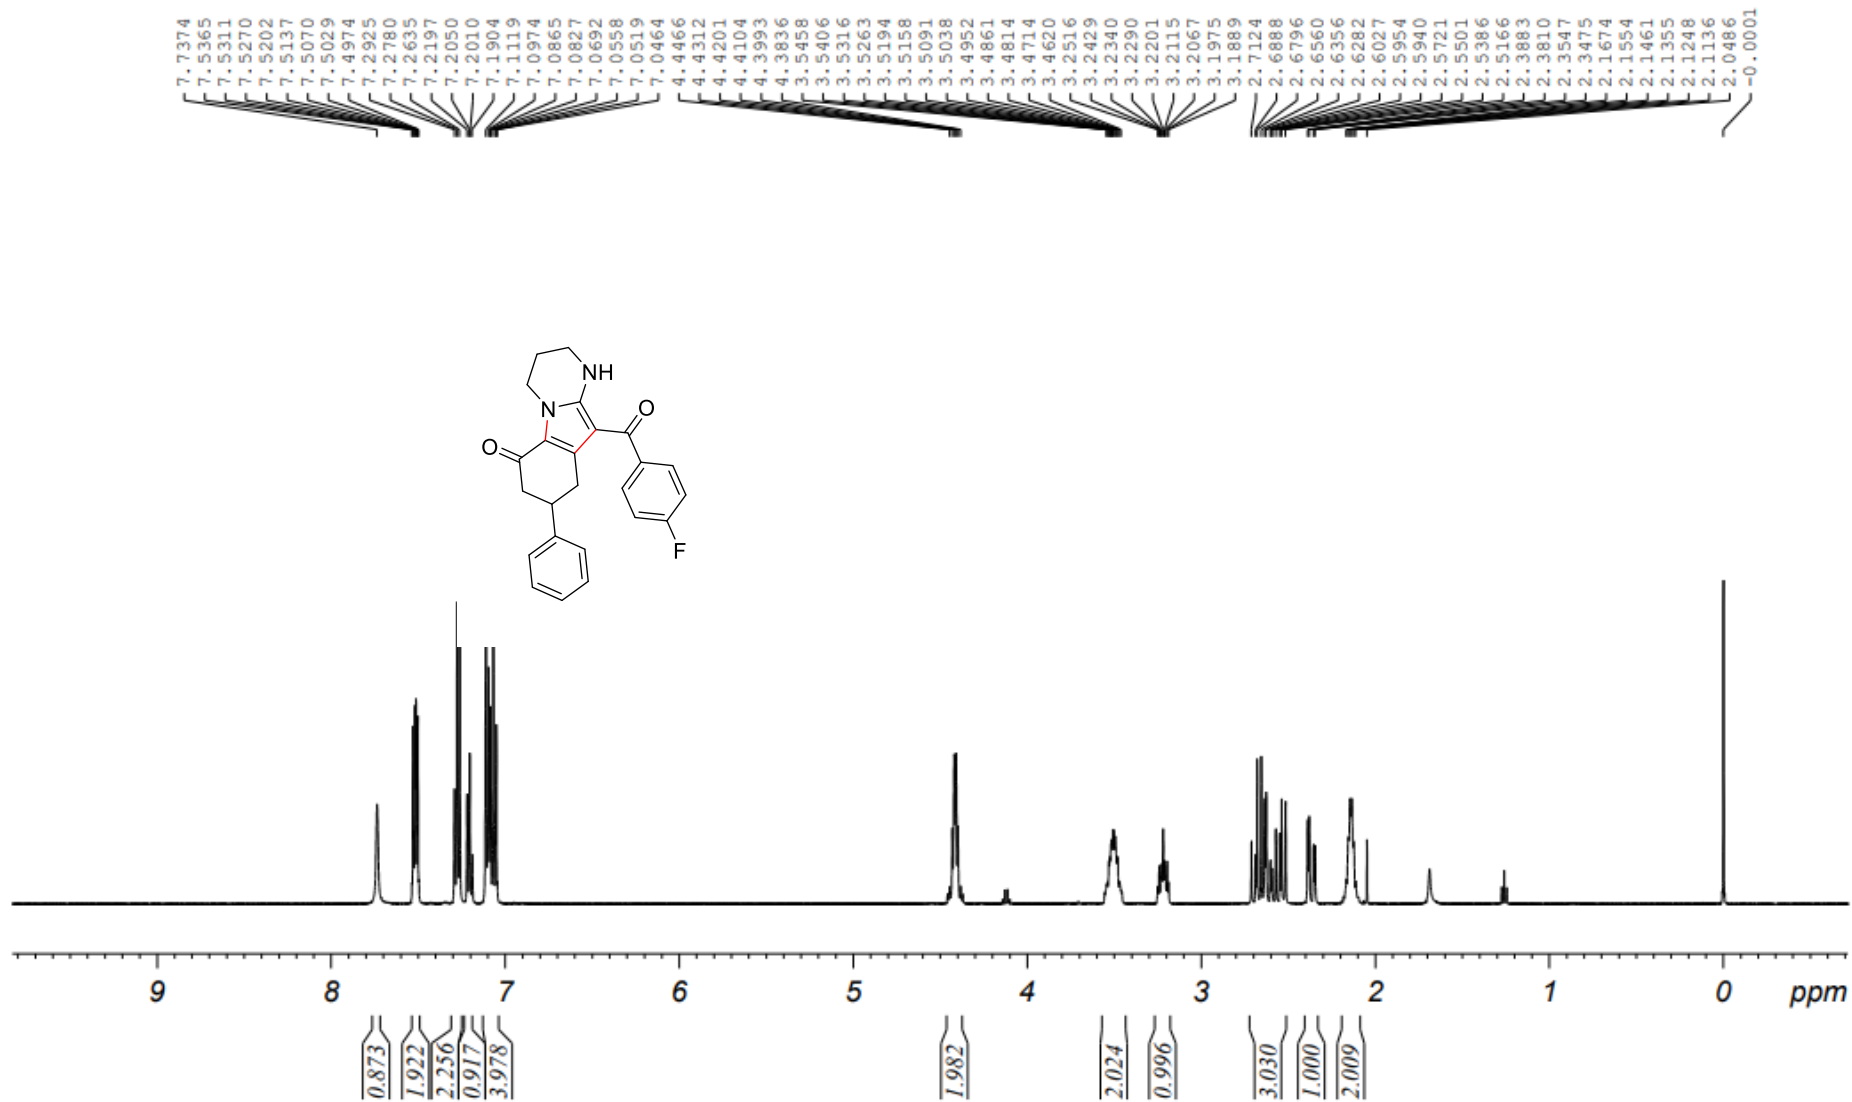

Figure S59. <sup>1</sup>H NMR (500 MHz, CDCl<sub>3</sub>-d<sub>6</sub>) spectra of compound 4h



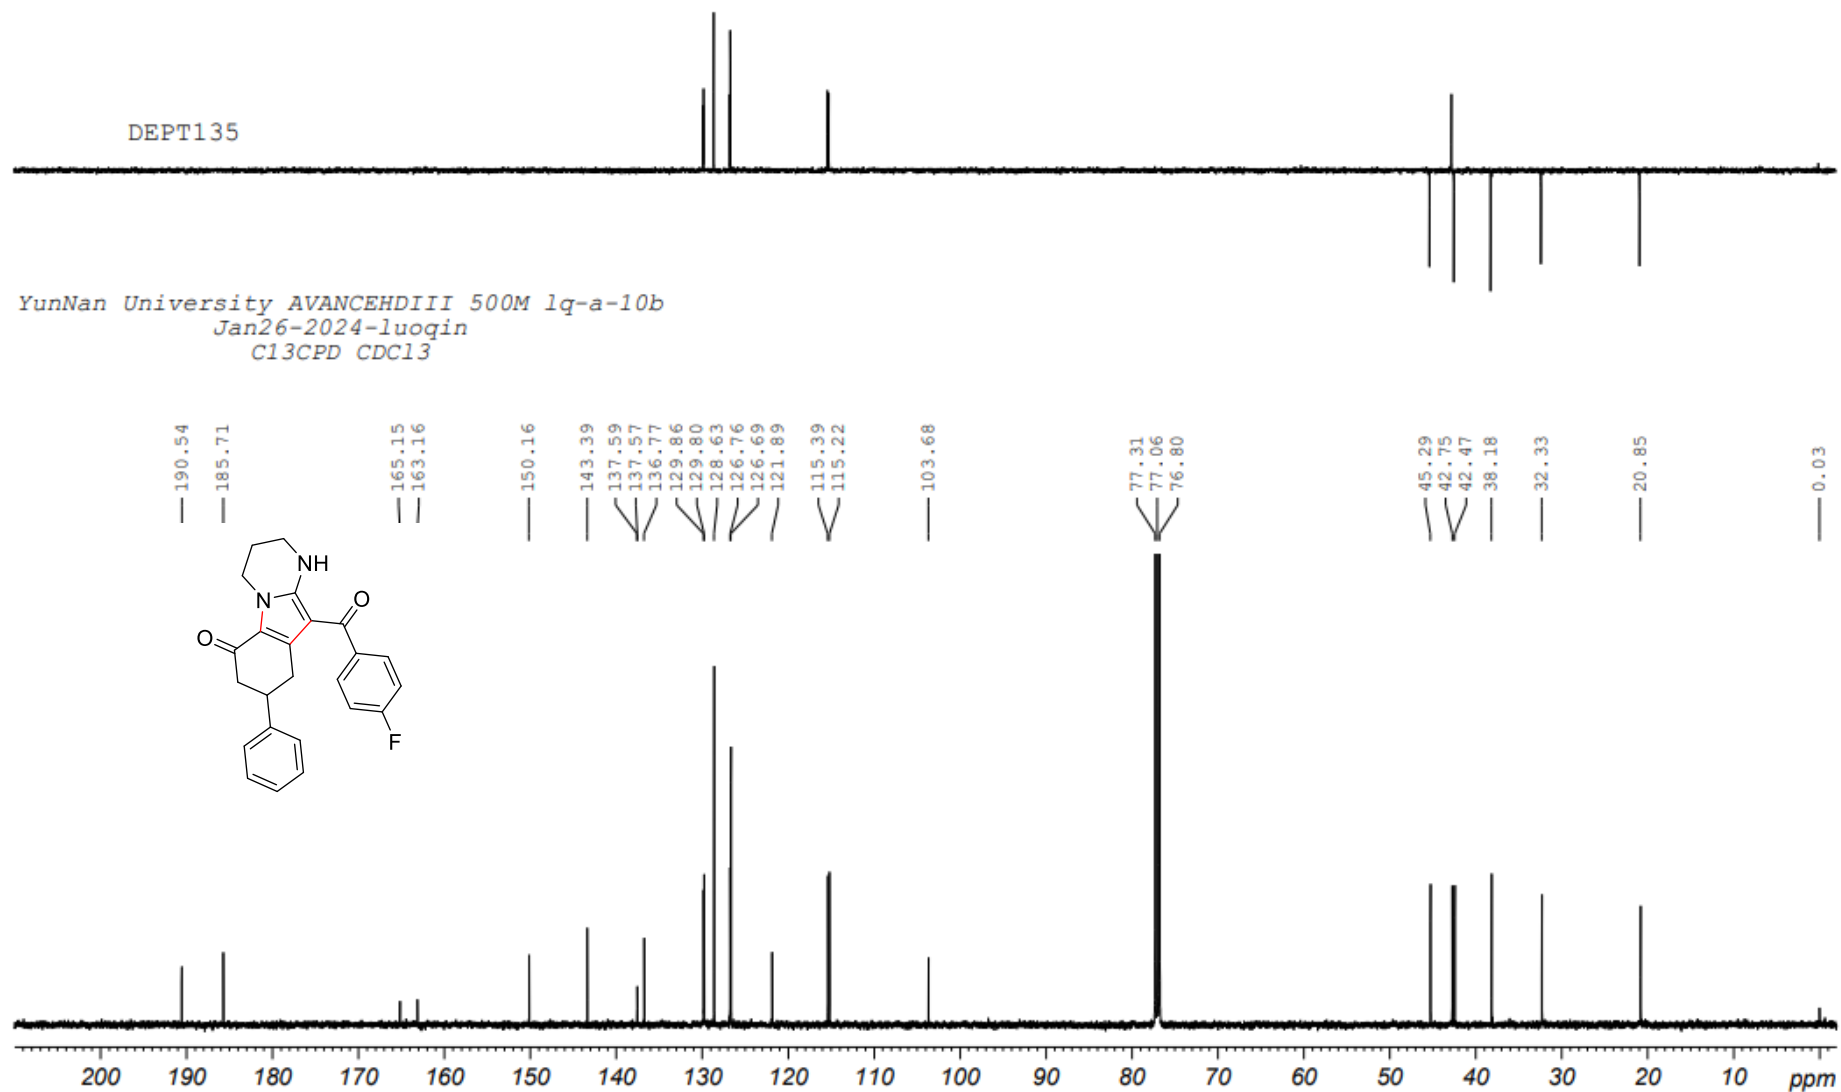

Figure S60.  $^{13}\text{C}$  NMR (125 MHz,  $\text{CDCl}_3-d_6$ ) spectra of compound 4h

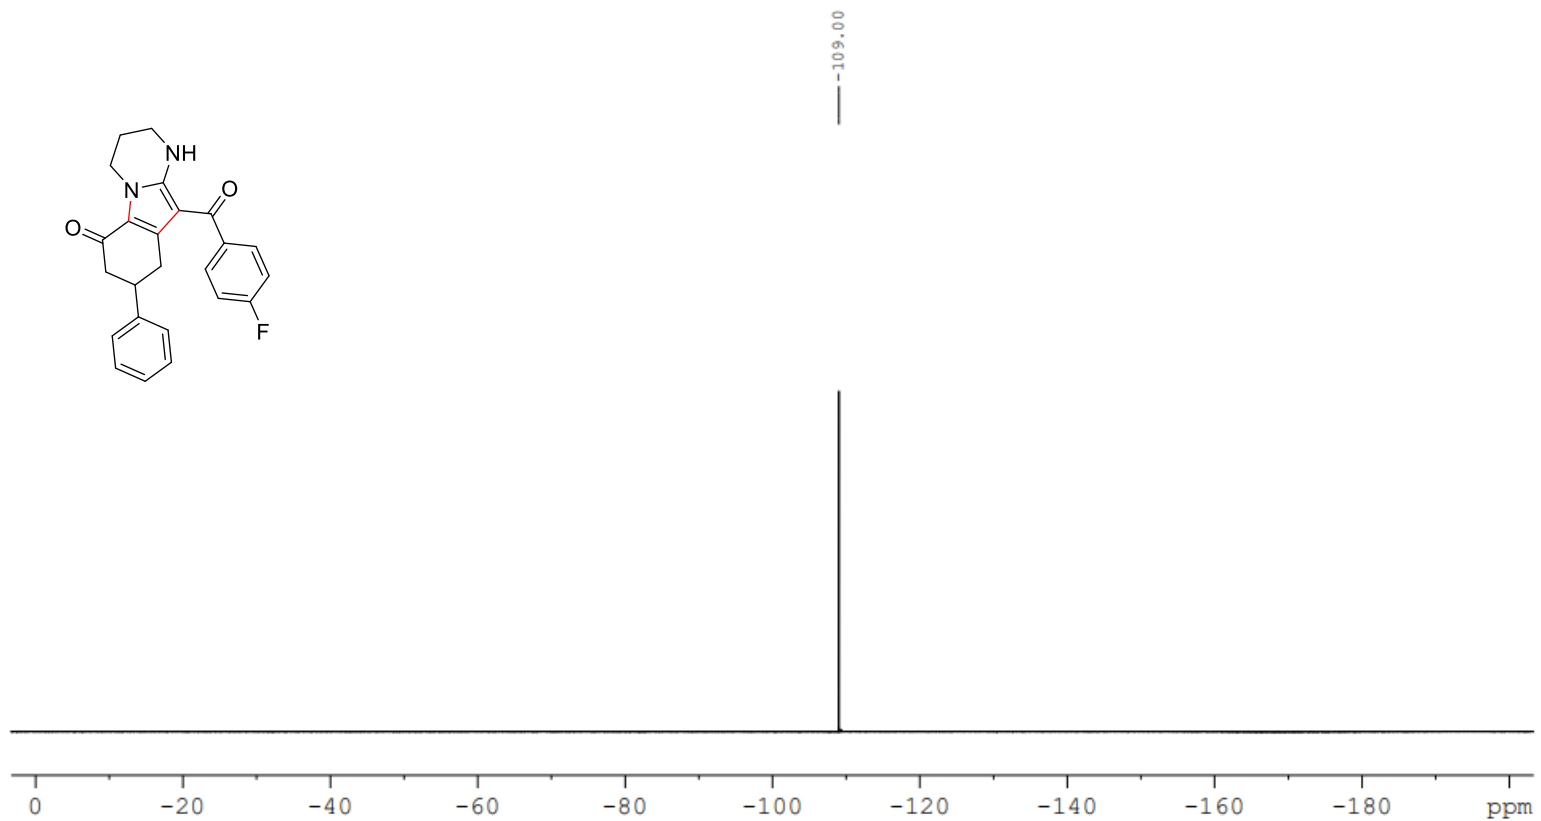

**Figure S61.**  $^{19}\text{F}$  NMR (475 MHz,  $\text{CDCl}_3-d_6$ ) spectra of compound **4h**

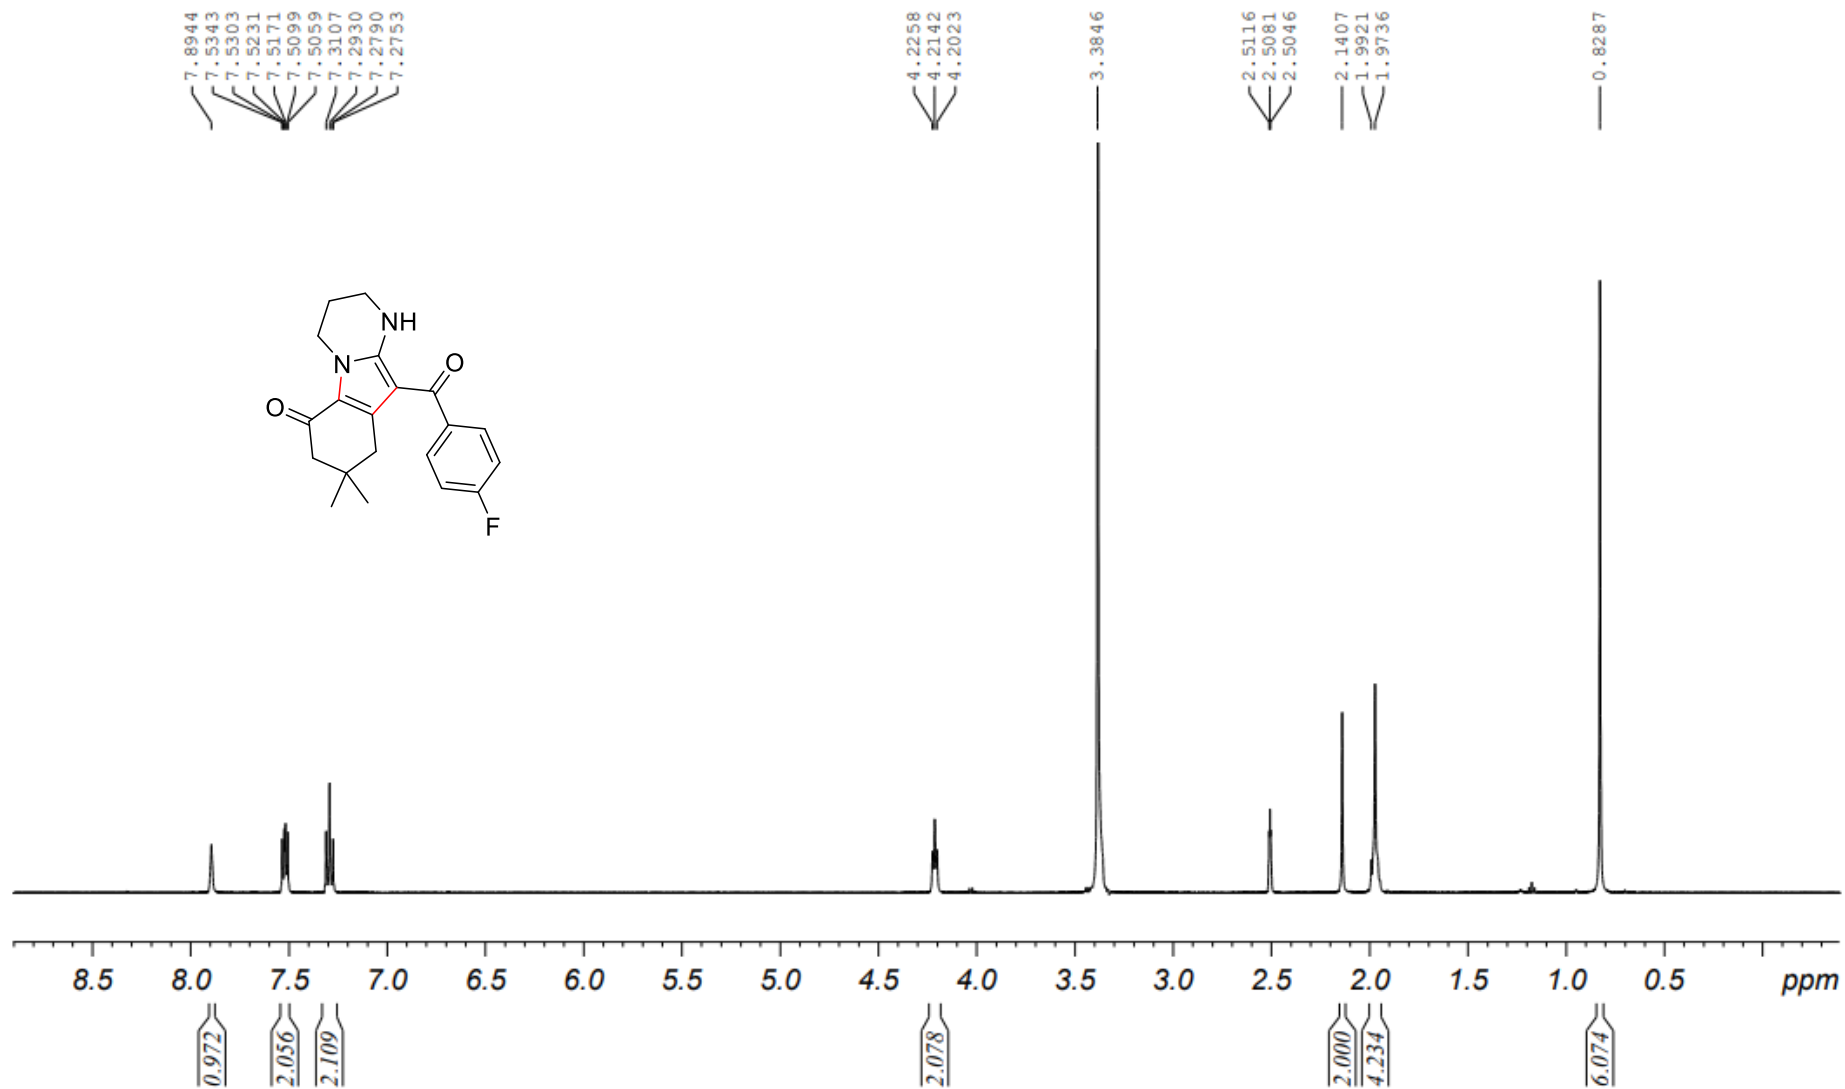

**Figure S62.** <sup>1</sup>H NMR (500 MHz, DMSO-*d*<sub>6</sub>) spectra of compound **4i**

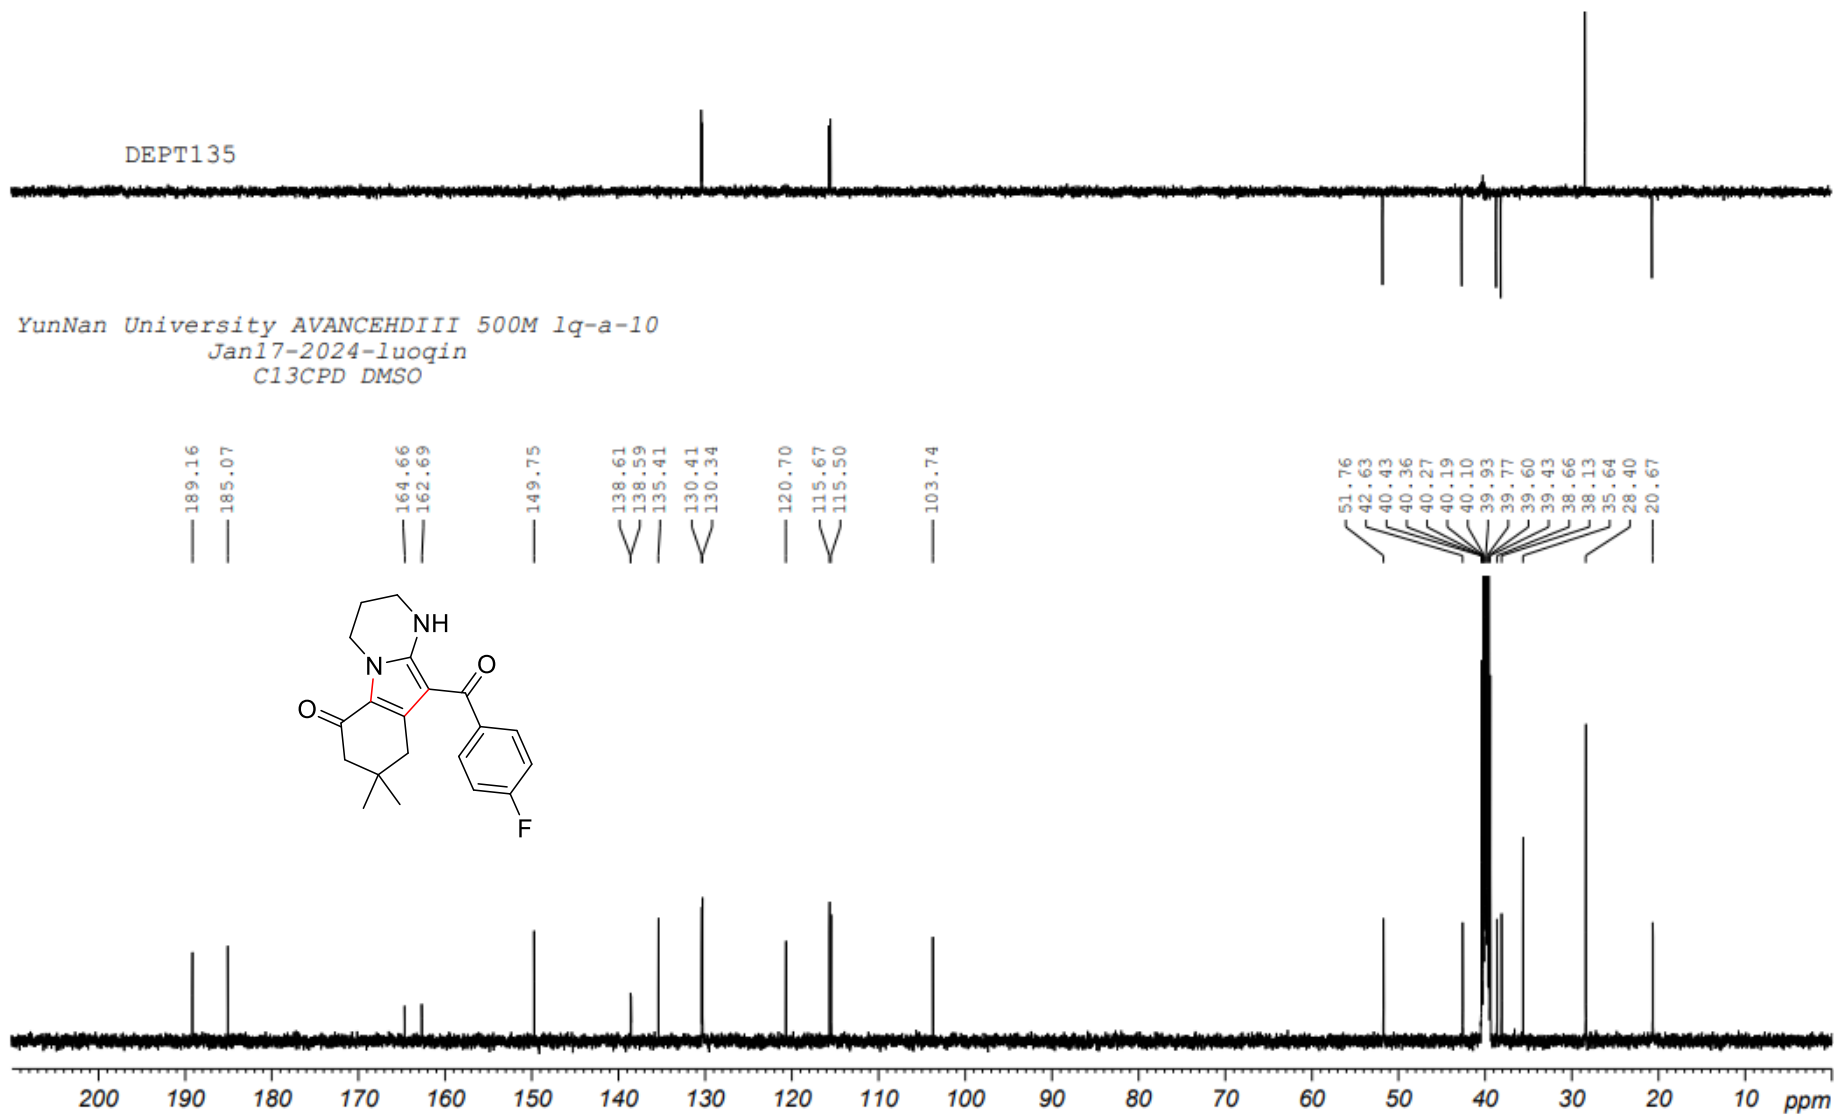

Figure S63.  $^{13}\text{C}$  NMR (125 MHz, DMSO- $d_6$ ) spectra of compound **4i**

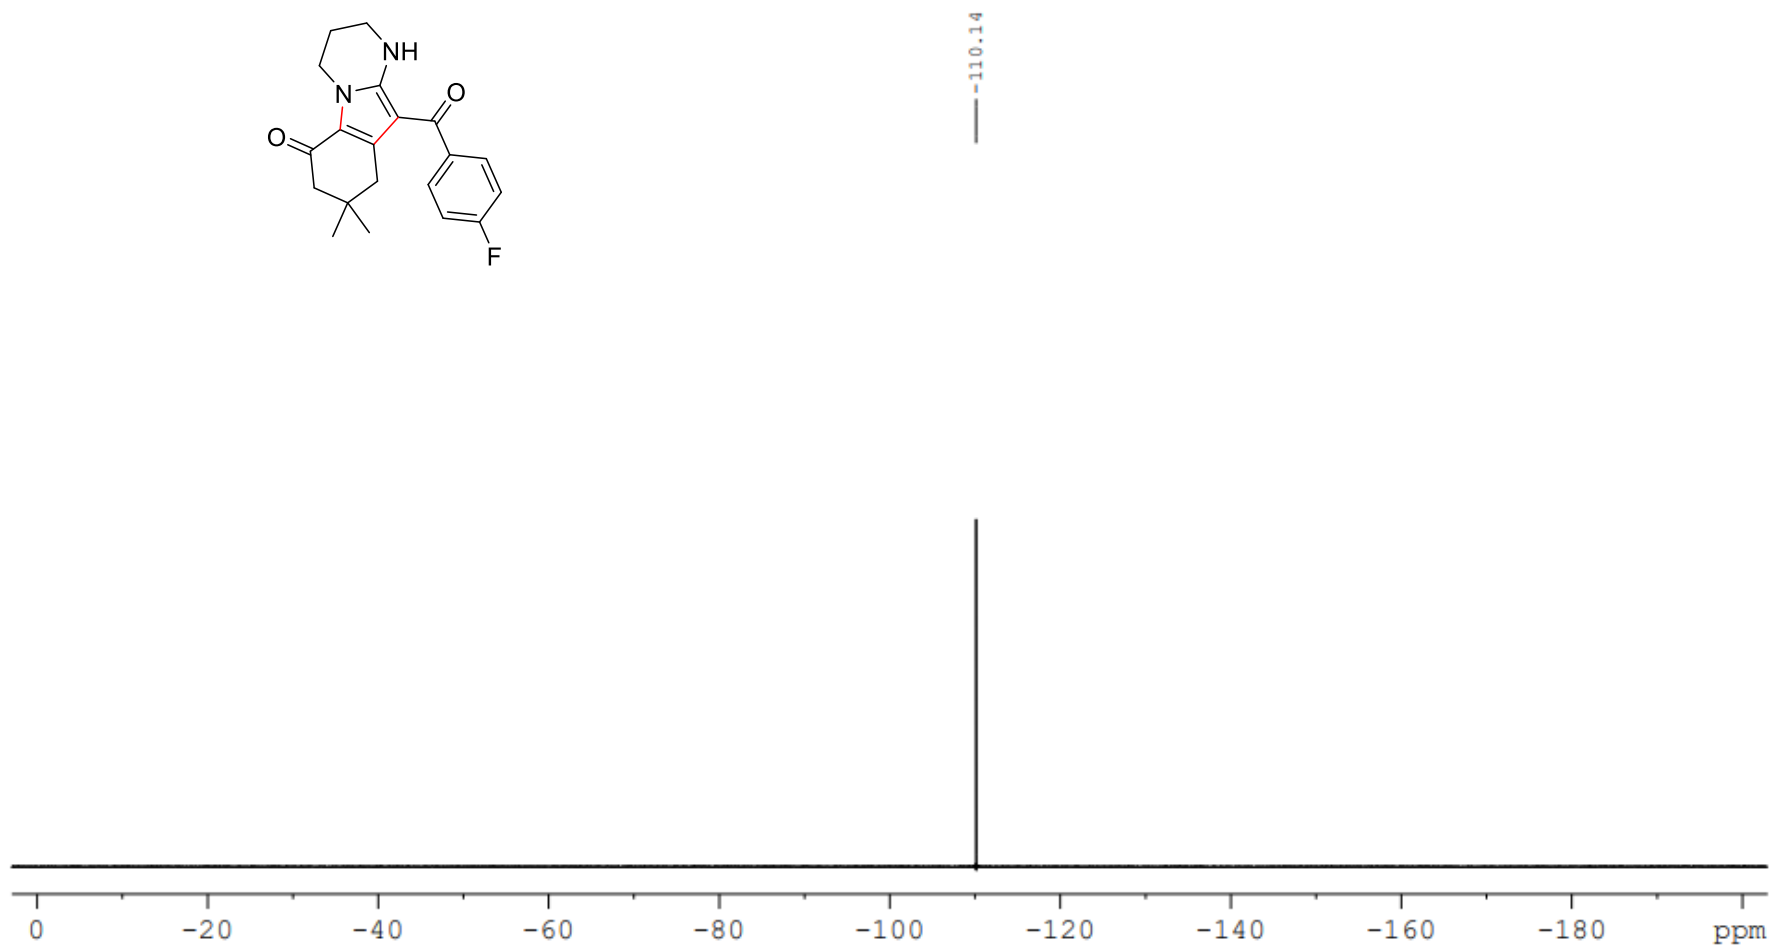

**Figure S64.**  $^{19}\text{F}$  NMR (475 MHz,  $\text{DMSO-}d_6$ ) spectra of compound **4i**

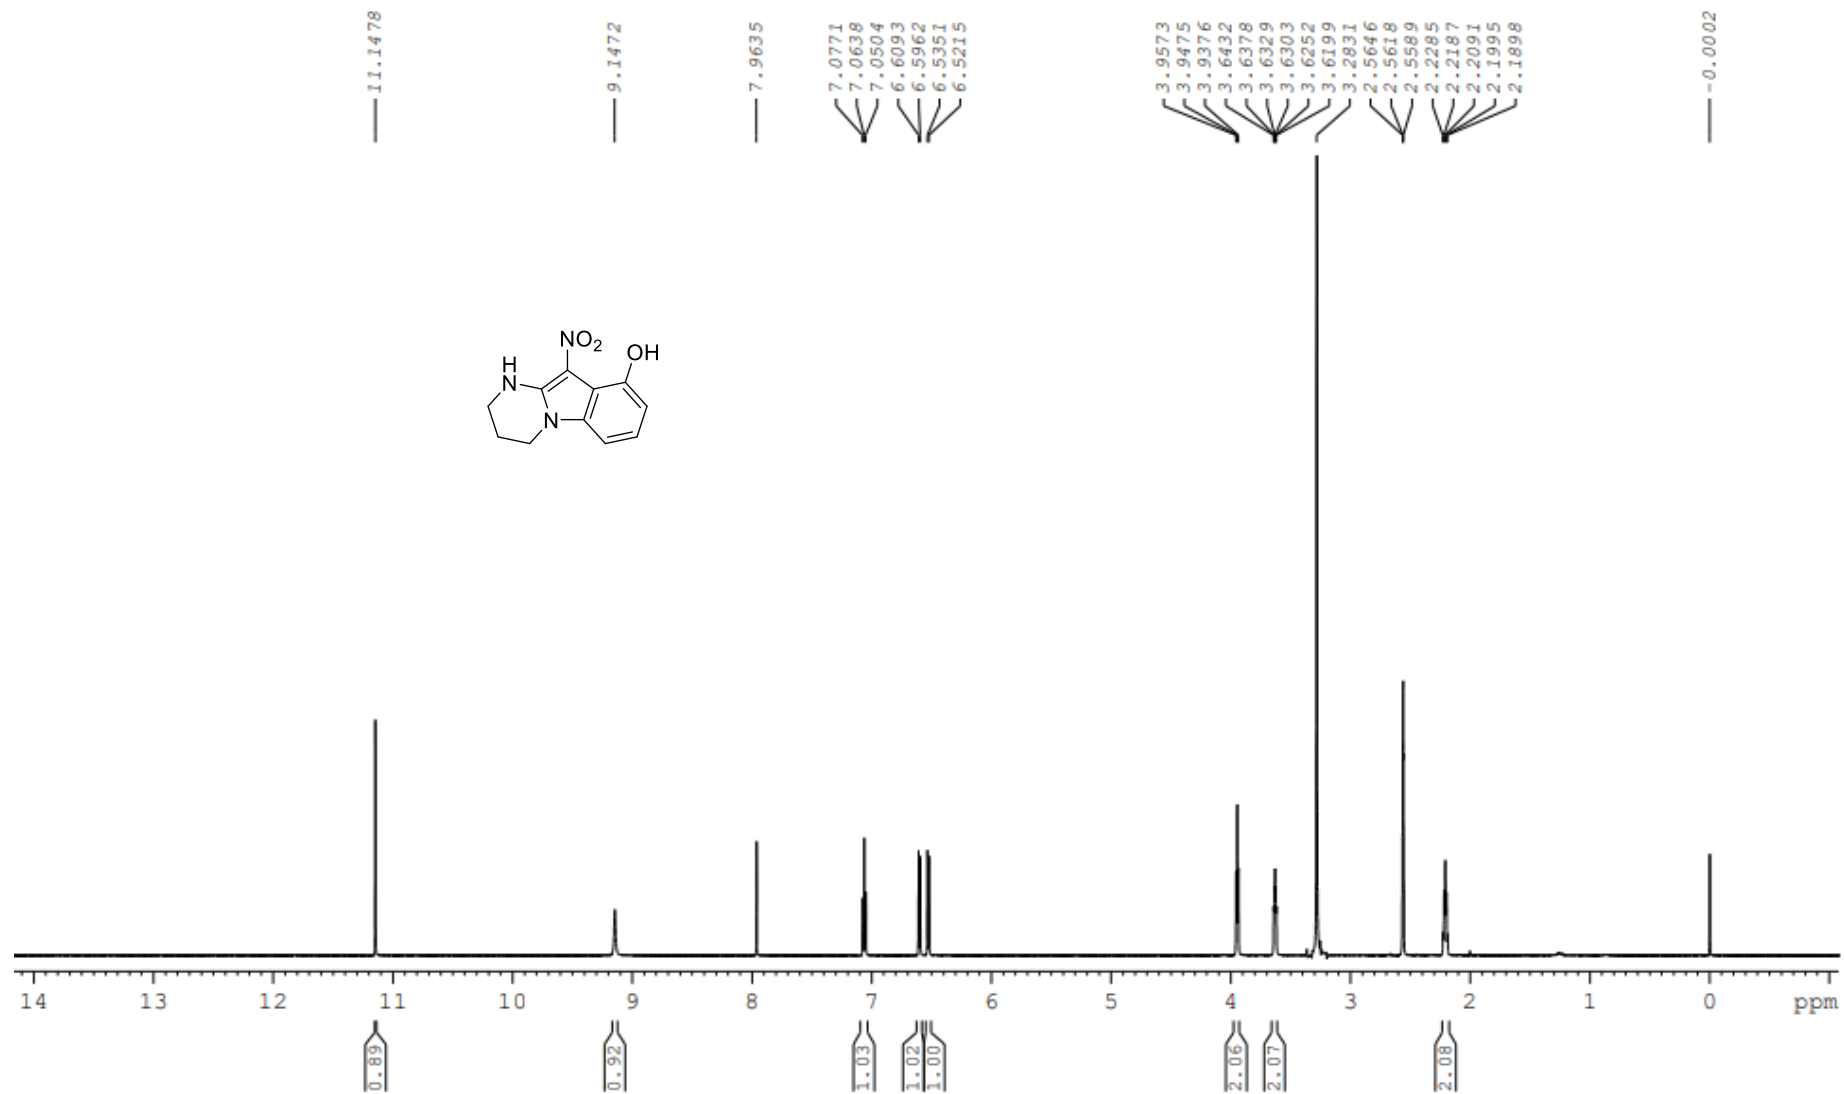

**Figure S65.** <sup>1</sup>H NMR (600 MHz, DMSO-*d*<sub>6</sub>) spectra of compound **5a**

DEPT135

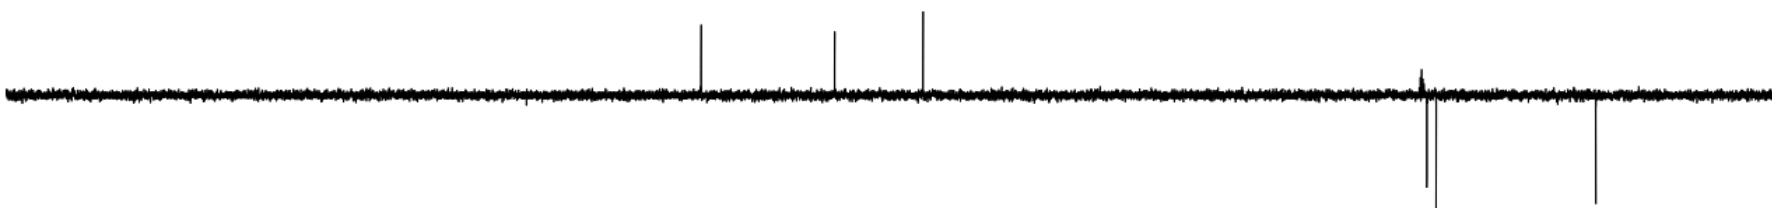

YUNNAN UNIVERSITY ASCEND AVIIIHD600 lq-2-13  
Mar08-2024-luoqin  
C13CPD DMSO

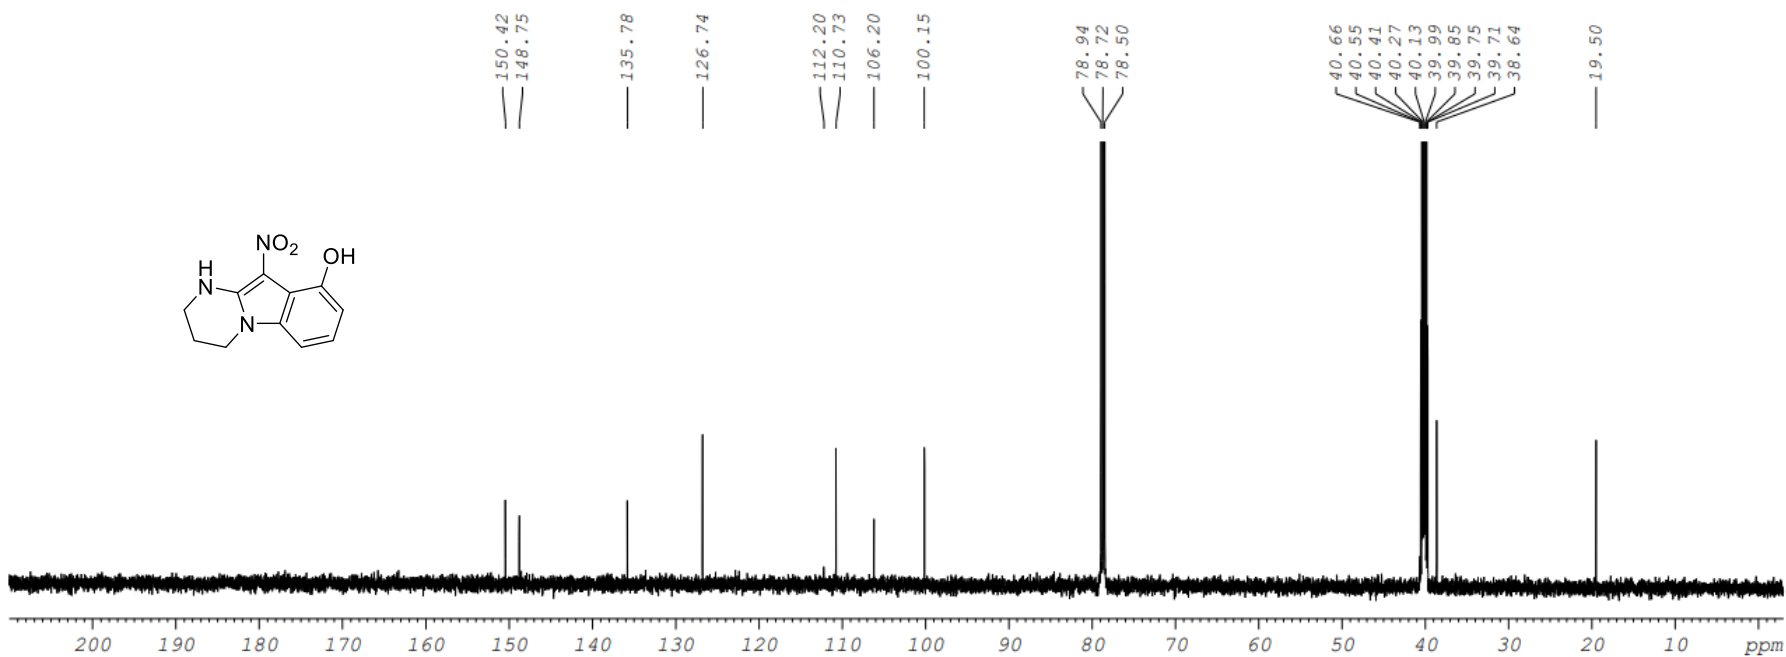

Figure S66.  $^{13}\text{C}$  NMR (150 MHz, DMSO- $d_6$ ) spectra of compound **5a**

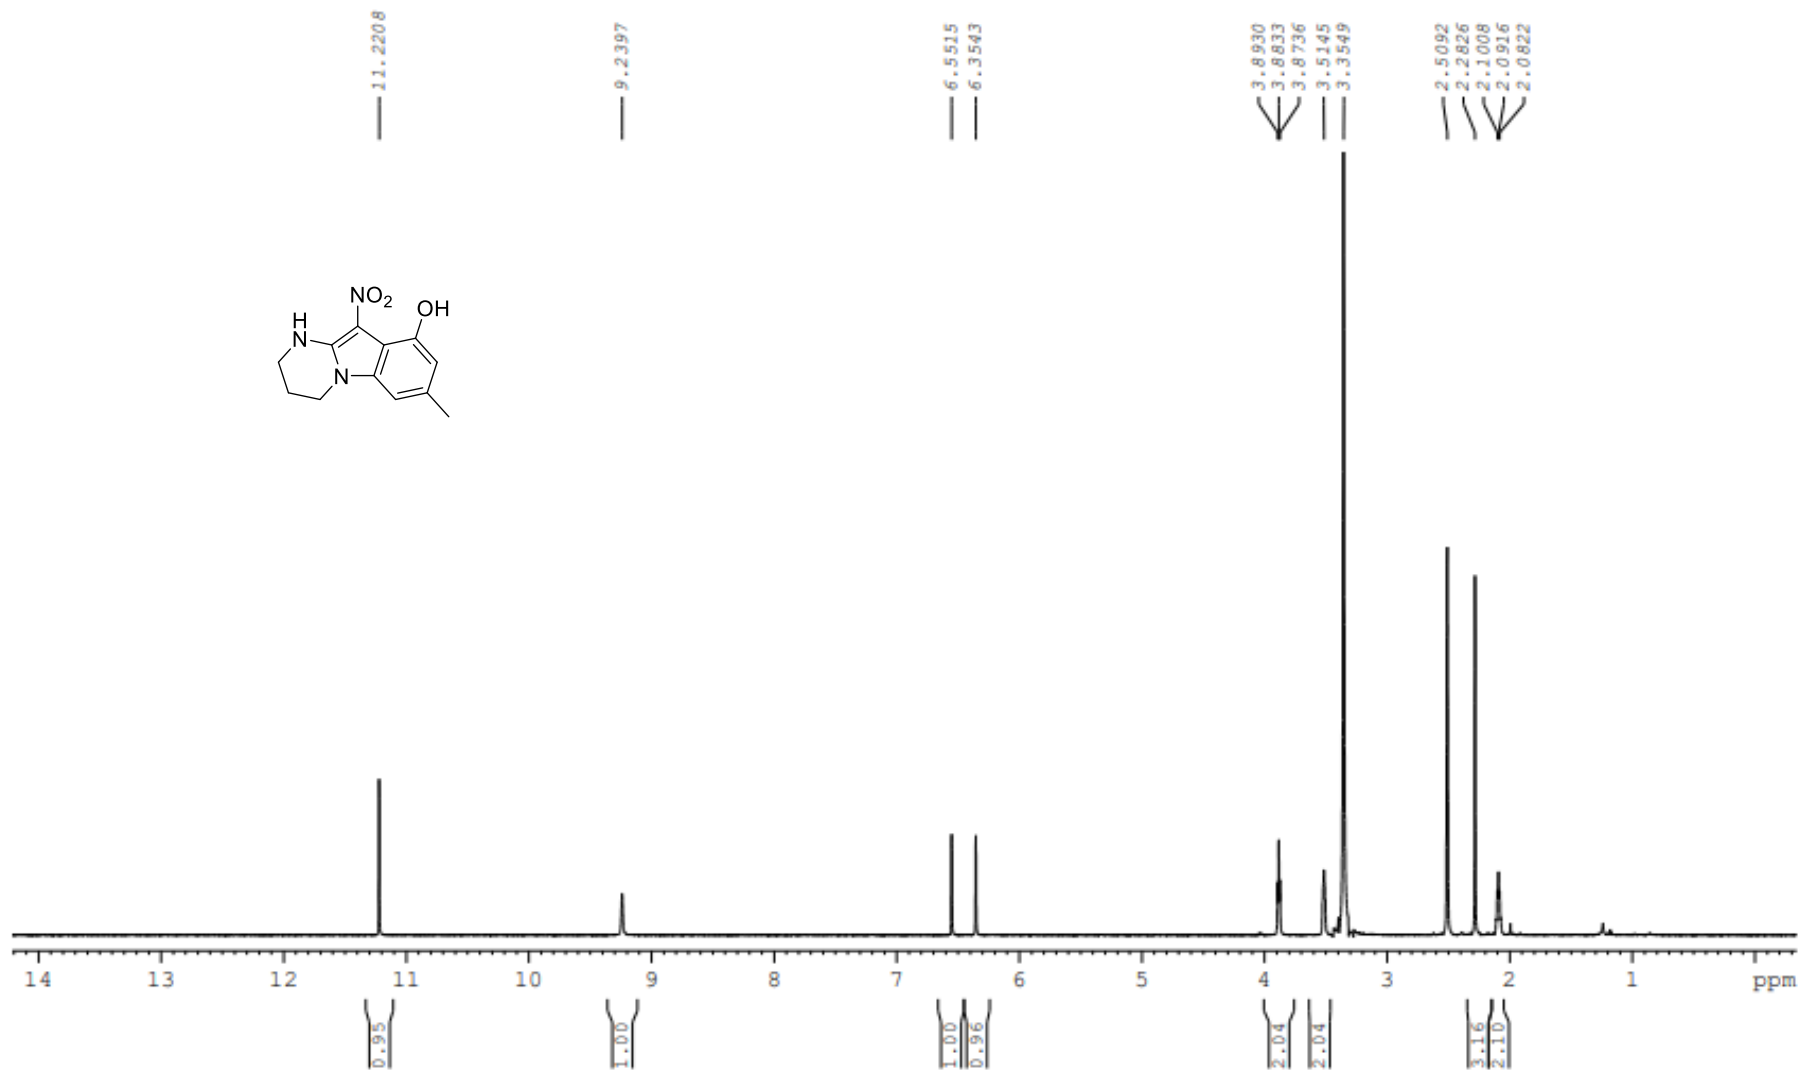

**Figure S67.** <sup>1</sup>H NMR (600 MHz, DMSO-*d*<sub>6</sub>) spectra of compound **5b**



DEPT135

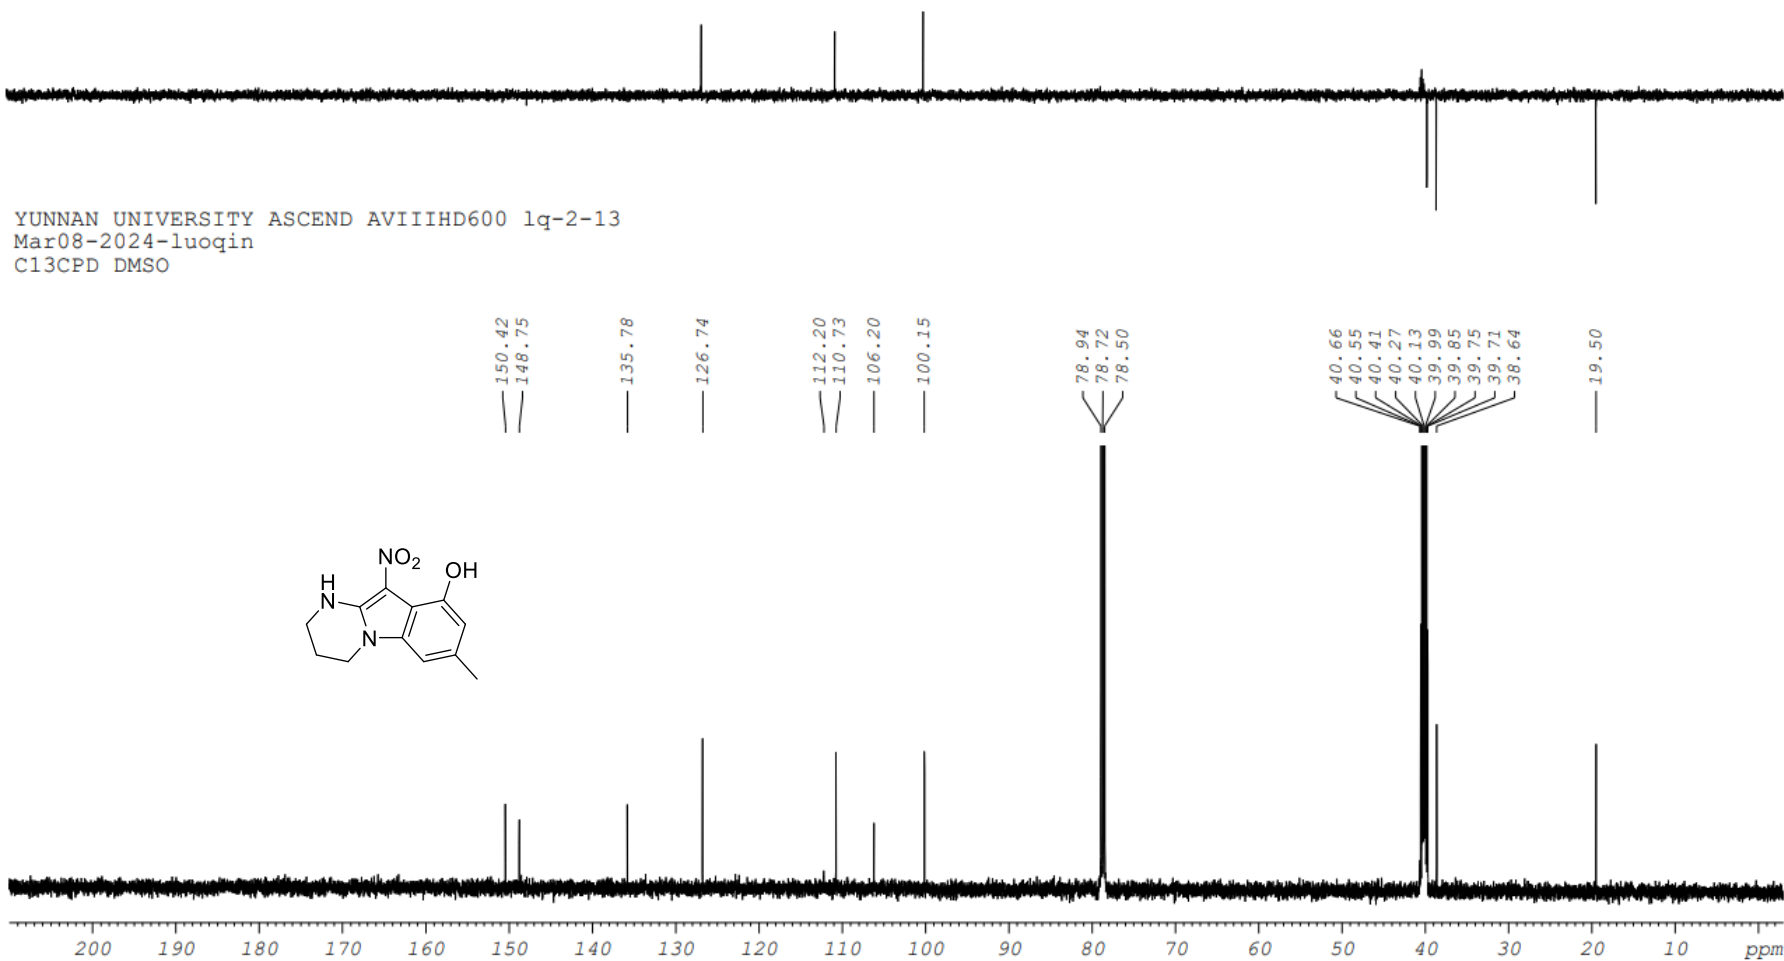

Figure S68.  $^{13}\text{C}$  NMR (150 MHz, DMSO- $d_6$ ) spectra of compound **5b**

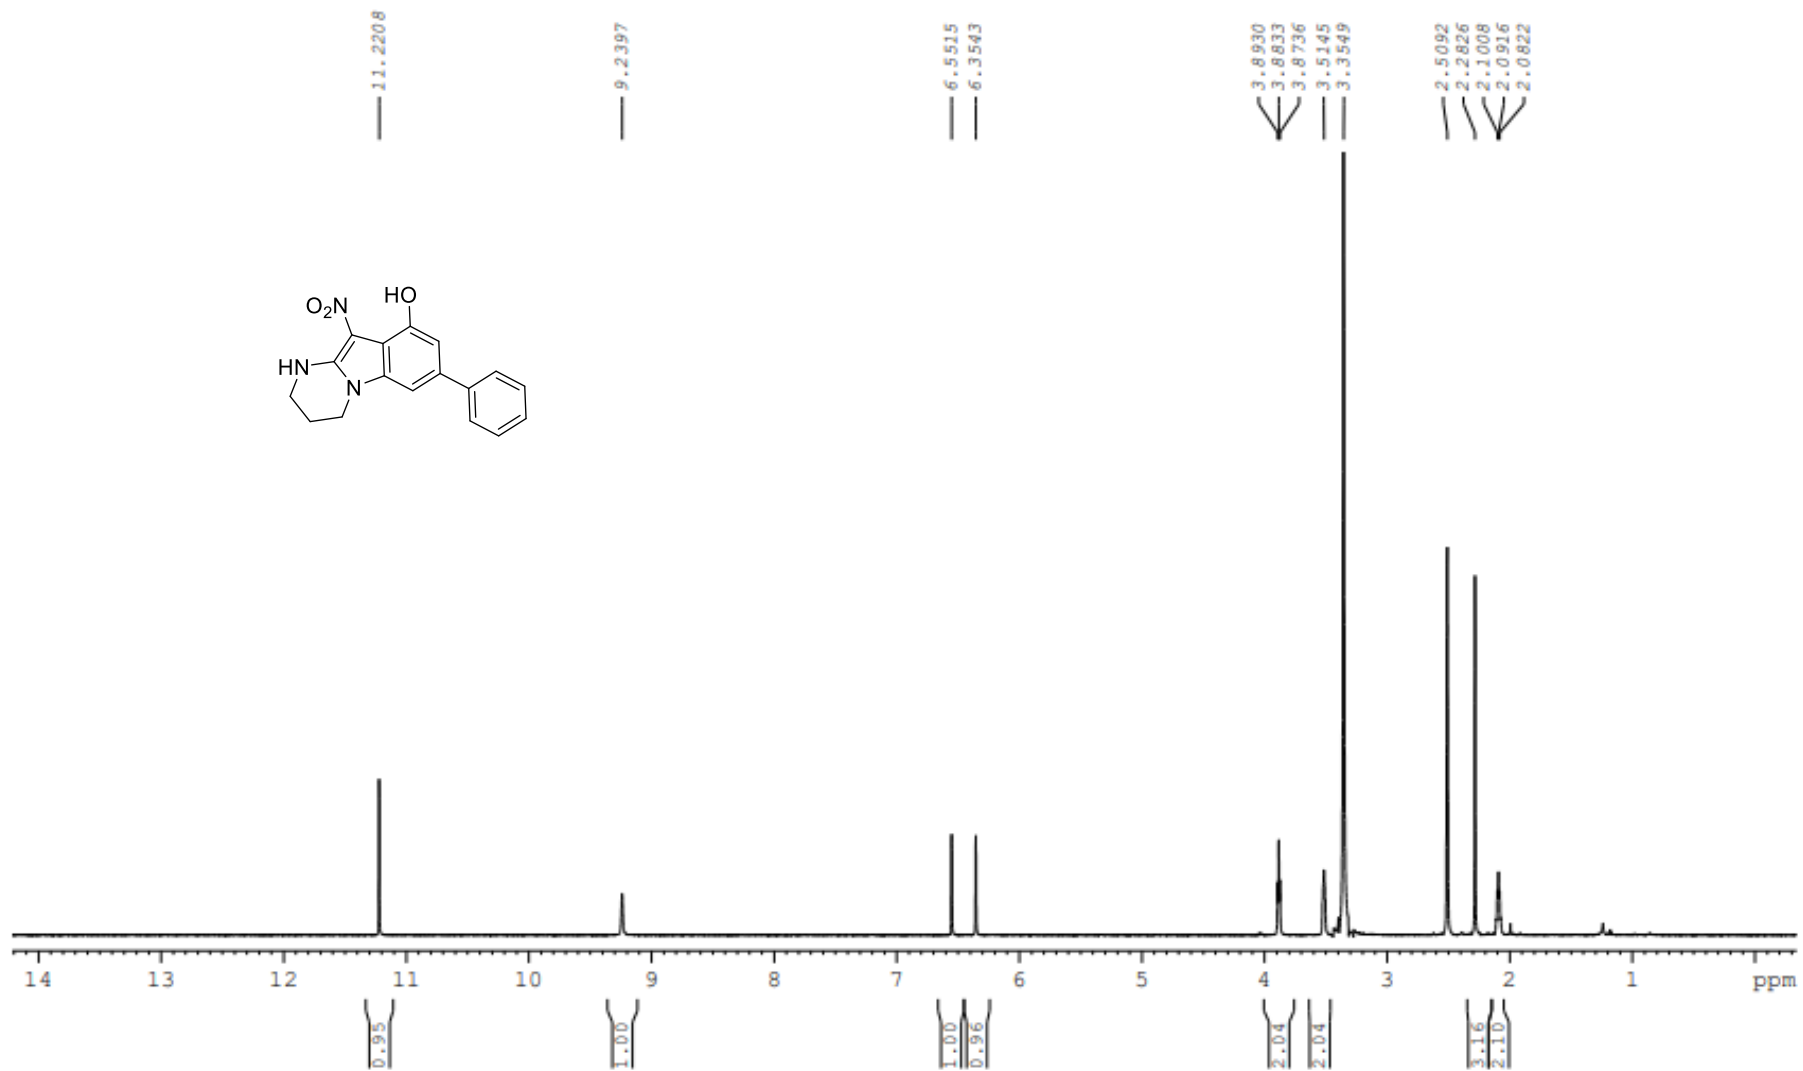

**Figure S69.** <sup>1</sup>H NMR (600 MHz, DMSO-*d*<sub>6</sub>) spectra of compound 5c

DEPT135

YUNNAN UNIVERSITY ASCEND AVIIIHD600 lq-2-13  
Mar08-2024-luoqin  
C13CPD DMSO

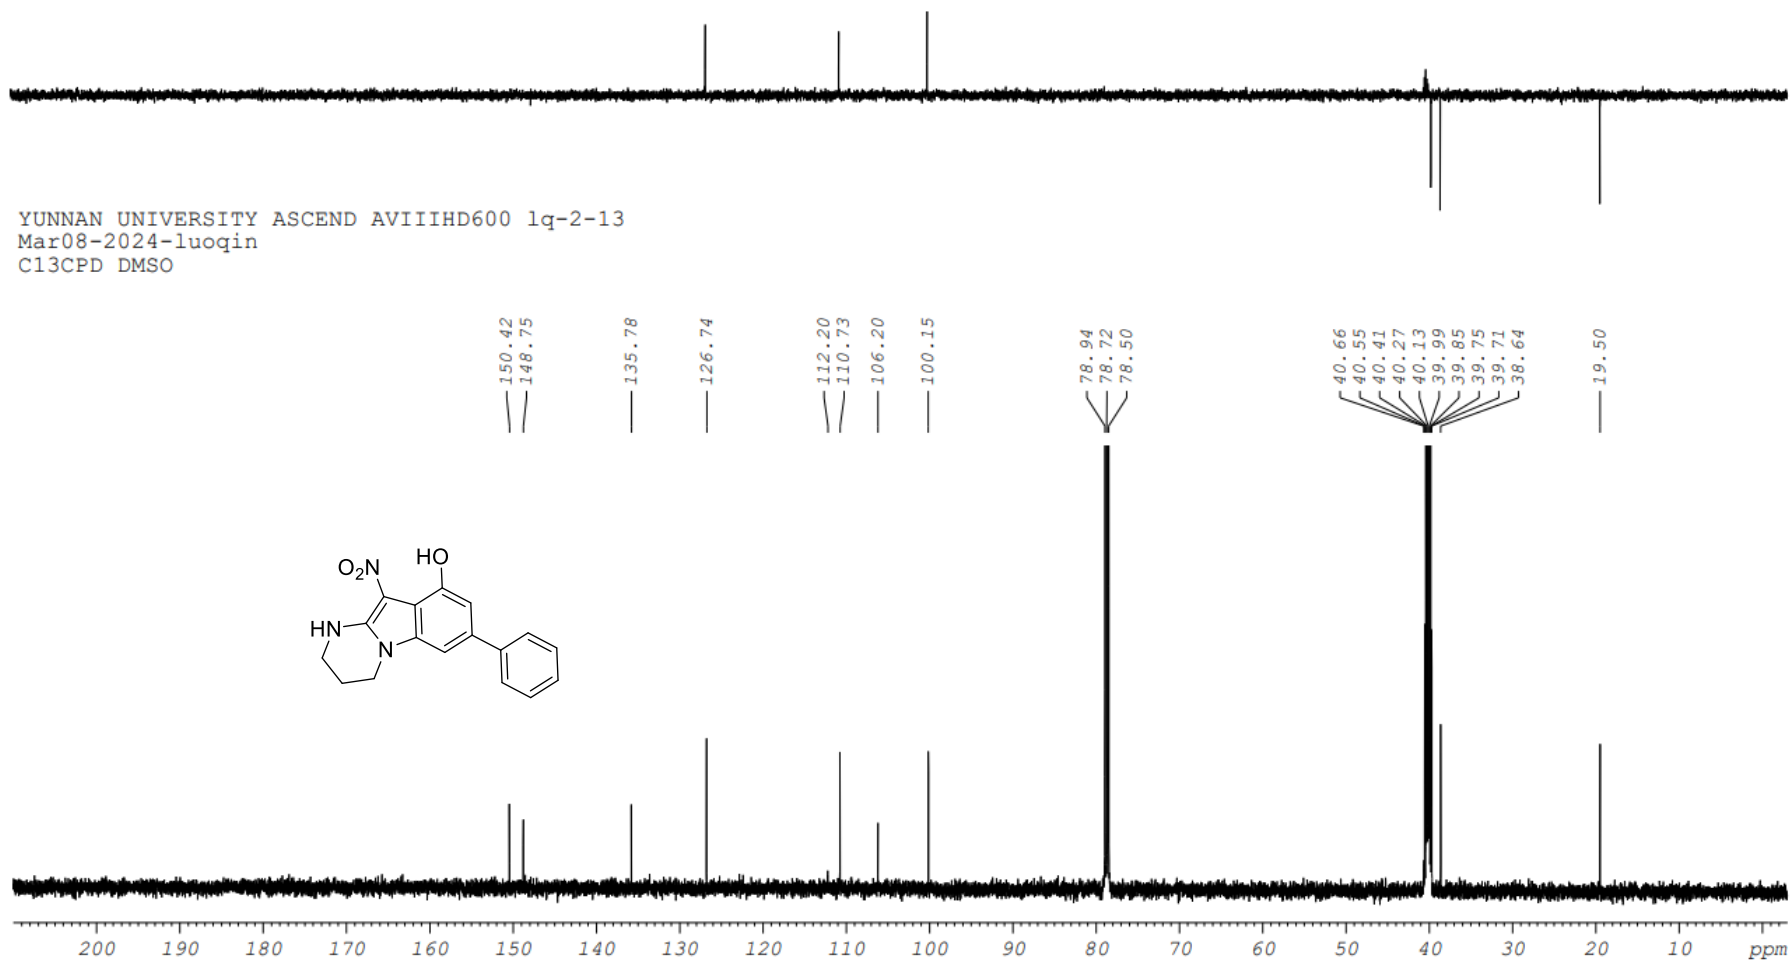

Figure S70. <sup>13</sup>C NMR (150 MHz, DMSO-*d*<sub>6</sub>) spectra of compound 5c

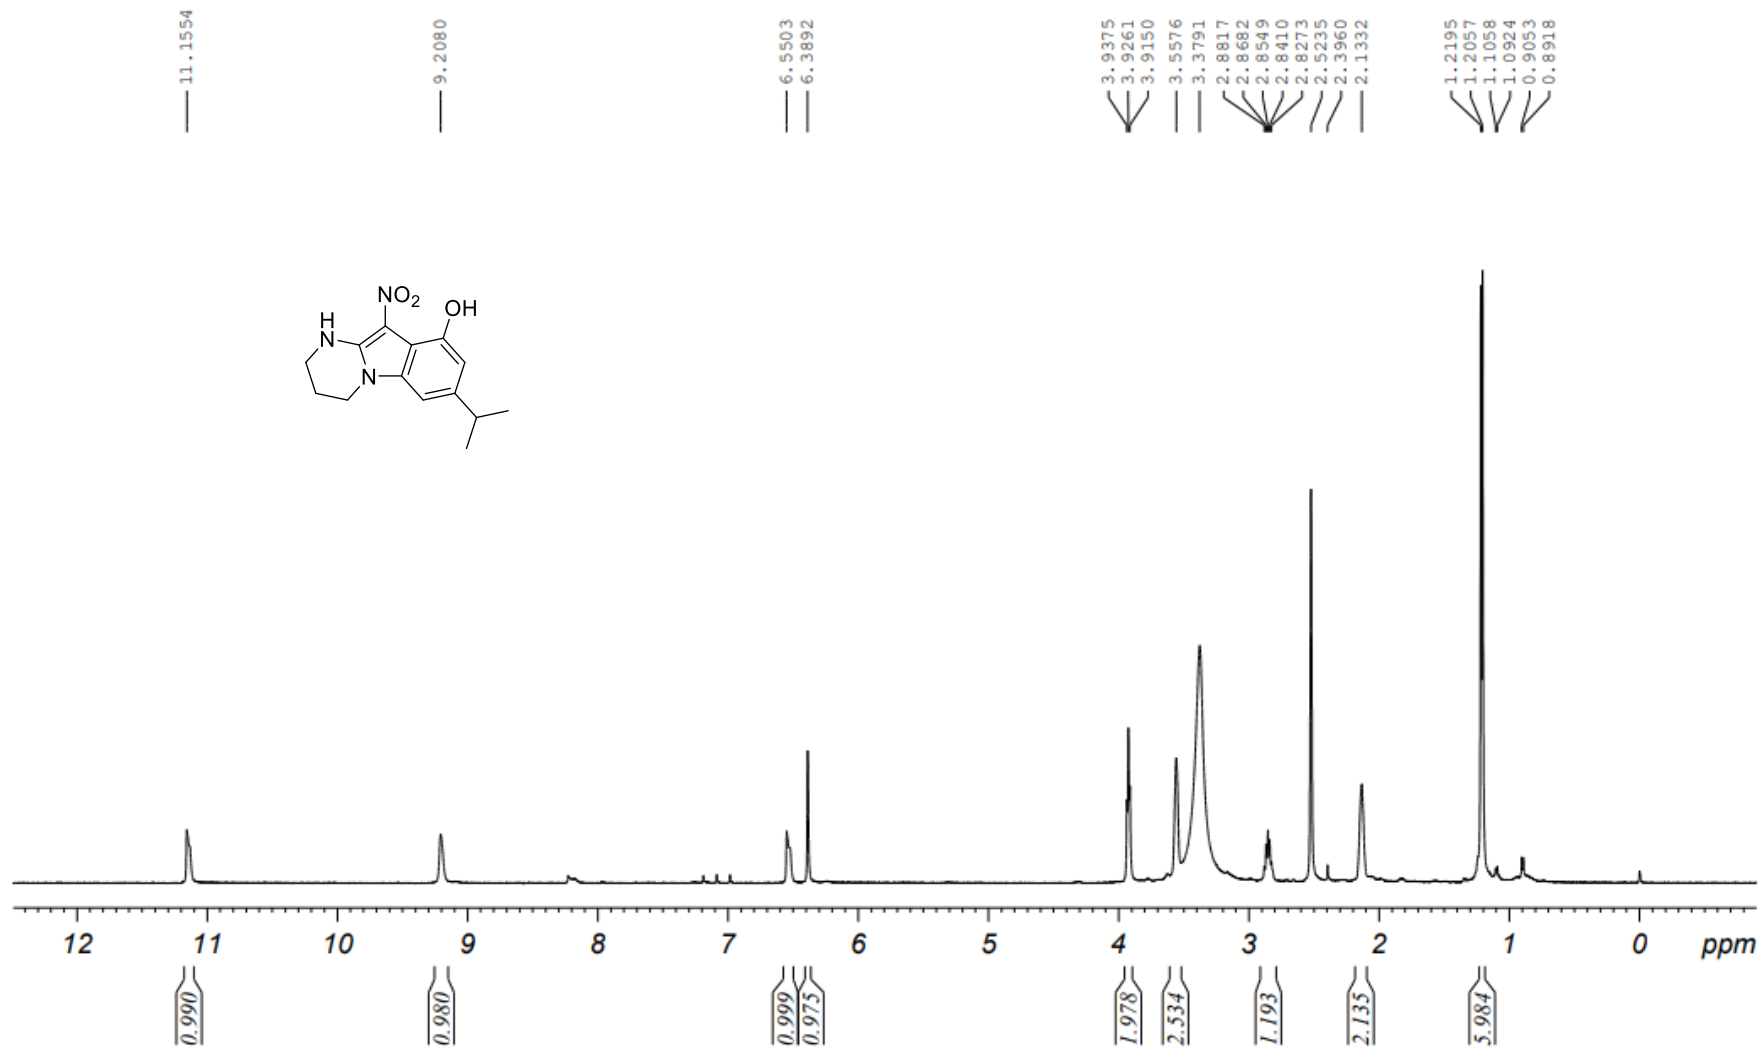

**Figure S71.** <sup>1</sup>H NMR (500 MHz, DMSO-*d*<sub>6</sub>) spectra of compound **5d**

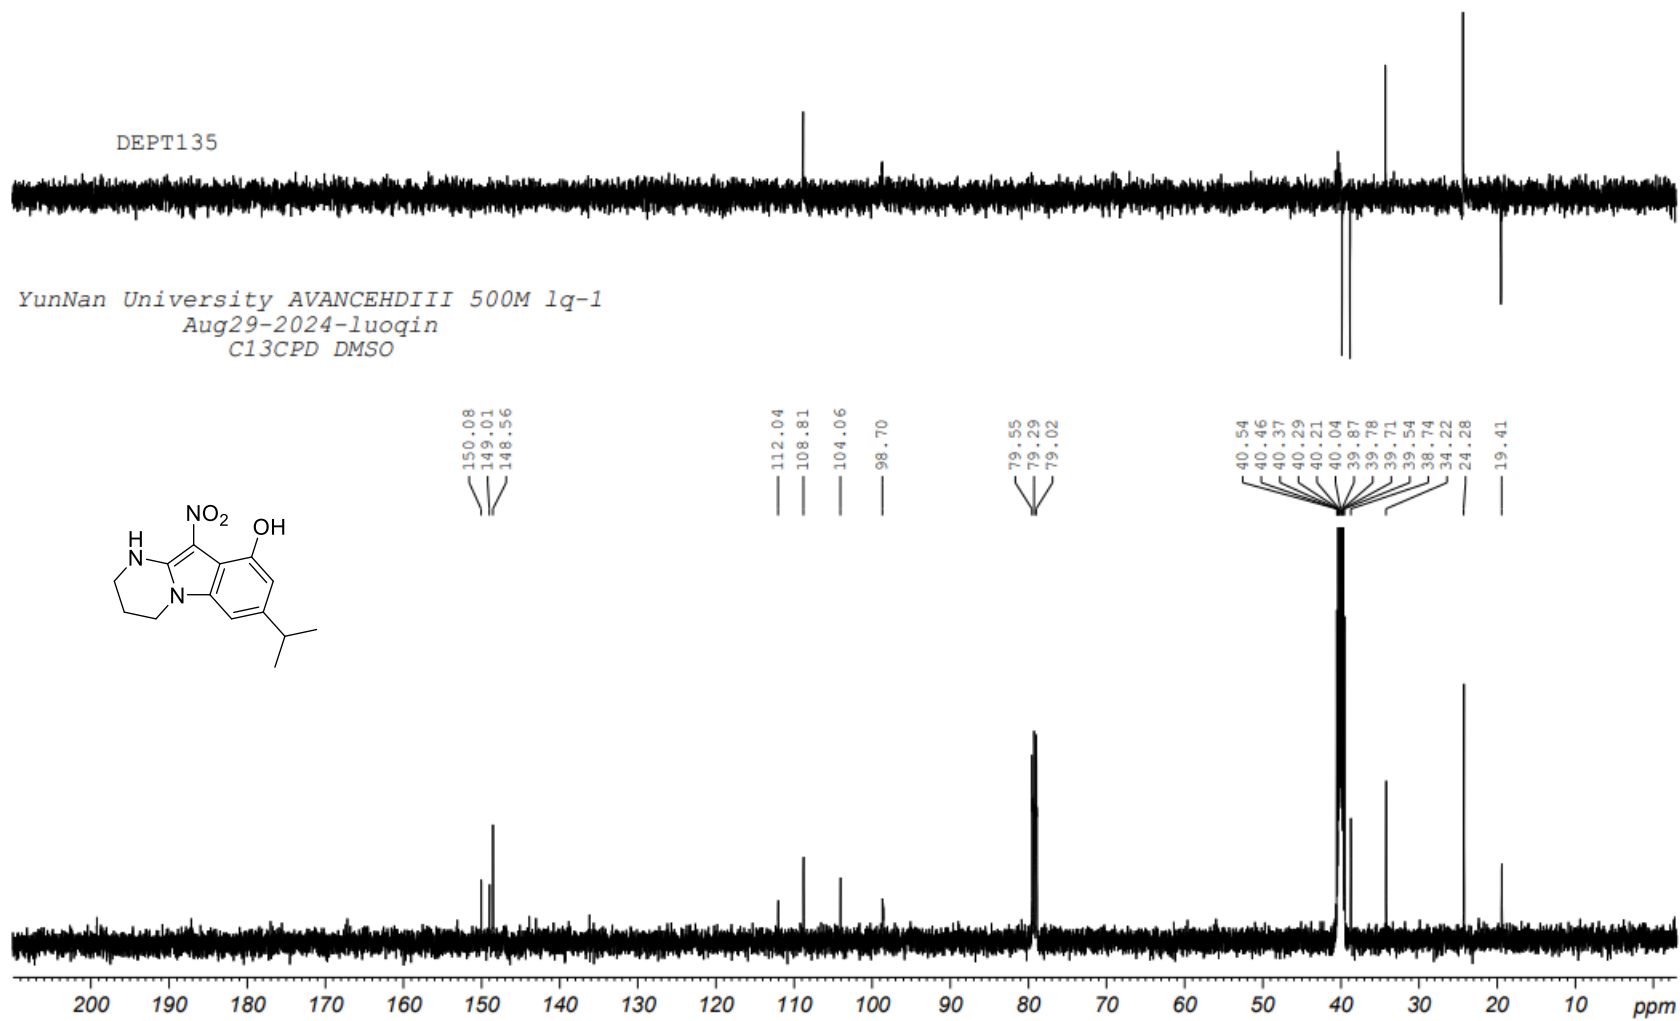

Figure S72.  $^{13}\text{C}$  NMR (125 MHz, DMSO- $d_6$ ) spectra of compound 5d

## References

1. (a) Q.-X. Zi, C.-L. Yang, K. Li, Q. Luo, J. Lin, S.-J. Yan, *J. Org. Chem.*, 2020, 85, 327. (b) Z.-T. Huang, Z.-R. Liu, *Synthesis*, 1987, 357. (c) C.-Y. Yu, P.-H. Yang, M.-X. Zhao, Z.-T. Huang, *Synthesis*, 2006, 12, 1835. (d) K. Luo, Y. Zhao, J. Zhang, J. He, R. Huang, S. Yan, J. Lin, Y. Jin, *Org. Lett.*, 2019, 21, 423. (e) Z.-T. Huang, Z.-R. Liu, *Synth. Commun.*, 1989, 19, 943.
2. (a) Mayakrishnan, S.; Tamizmani, M.; Maheswari, N. *U. Chem. Commun.*, 2020, 56, 15462. (b) Yang, L.; Pi, C.; Wu, Y.; Cui, X. *Org. Lett.*, 2022, 24, 7502.
3. CCDC 2373953 contain the supplementary crystallographic data for compound **3d**. CCDC 2373954 contain the supplementary crystallographic data for compound **4h**. These data can be obtained free of charge from The Cambridge Crystallographic Data Center *via* [www.ccdc.cam.ac.uk/data\\_request/cif](http://www.ccdc.cam.ac.uk/data_request/cif)
